# Supplementary material for: Reviews and syntheses: Insights into deep-sea food webs and global environmental gradients revealed by stable isotopes (δ 15 N, δ 13 C) and fatty acids trophic biomarkers
Source: Copernicus journal article supplement (doi:10.5194/bg-2019-80), 2019-03-12
Supplement: Supplementary file 1 [file Table S1.xlsx]

## Sheet: SI dataset
Table S1. Dataset applied to analyze trends the isotopic composition of deep-sea animals. Values of δ15N and δ13C are expressed in parts per thousand (‰). For the polar latitudes, data were provided by Iken et al. (2005), Bergmann et al. (2009), van Øevelen et al. (2018). For temperate regions, data from Iken et al. (2001), Madurell et al. (2008), Sherwood et al. (2008), Carlier et al. (2009), Fa…
Latitude	Ocean/Ocean region	Habitat	Collection depth	Phylum	Class	Species	δ15N	δ13C
Polar	Canadian Arctic	Benthic	Bathyal	Mollusca	Bivalvia	Bathyarca sp.	12.7	-22.3
Polar	Canadian Arctic	Benthic	Bathyal	Annelida	Polychaeta	Chaetozone setosa	15.3	-23.3
Polar	Canadian Arctic	Benthic	Bathyal	Echinodermata	Crinoidea	Crinoidea sp 1	6.9	-18
Polar	Canadian Arctic	Benthic	Bathyal	Mollusca	Bivalvia	Dacrydium cf. viteum	10.2	-20.1
Polar	Canadian Arctic	Benthic	Bathyal	Annelida	Polychaeta	Dorvillea cf. rudolphi	16.2	-20.7
Polar	Canadian Arctic	Benthic	Bathyal	Annelida	Echiura	Echiura sp 1	16.6	-17.8
Polar	Canadian Arctic	Benthic	Bathyal	Annelida	Polychaeta	Glycinde wireni	17.7	-21.4
Polar	Canadian Arctic	Benthic	Bathyal	Mollusca	Gastropoda	Limacina helicina	5.9	-22.4
Polar	Canadian Arctic	Benthic	Bathyal	Annelida	Polychaeta	Nephtys cf. malmgreni	17.4	-17.1
Polar	Canadian Arctic	Benthic	Bathyal	Annelida	Polychaeta	Nereidae	17.4	-17.4
Polar	Canadian Arctic	Benthic	Bathyal	Annelida	Polychaeta	Ophelina cylindricaudata	15.3	-19.5
Polar	Canadian Arctic	Benthic	Bathyal	Echinodermata	Ophiuroidea	Ophiuroidea sp 1	11.7	-23.5
Polar	Canadian Arctic	Benthic	Bathyal	Echinodermata	Ophiuroidea	Ophiuroidea sp 2	12.2	-20.8
Polar	Canadian Arctic	Benthic	Bathyal	Annelida	Polychaeta	Polychaeta sp 1	15.3	-19
Polar	Canadian Arctic	Benthic	Bathyal	Annelida	Polychaeta	Polychaeta sp 2	15.5	-20.7
Polar	Canadian Arctic	Benthic	Bathyal	Annelida	Polychaeta	Polychaeta sp 3	10.2	-21.3
Polar	Canadian Arctic	Benthic	Bathyal	Annelida	Polychaeta	Polychaeta sp 4	13.7	-19.5
Polar	Canadian Arctic	Benthic	Bathyal	Annelida	Polychaeta	Polychaeta sp 5	13.4	-19.7
Polar	Canadian Arctic	Benthic	Bathyal	Annelida	Polychaeta	Polychaeta sp 6	8.6	-20.3
Polar	Canadian Arctic	Benthic	Bathyal	Annelida	Polychaeta	Prionospio sp.	14.5	-19.8
Polar	Canadian Arctic	Benthic	Bathyal	Mollusca	Scaphopoda	Siphonodentalium lobatum	10.7	-21
Polar	Canadian Arctic	Demersal	Bathyal	Chordata	Elasmobranchi	Somniosus microcephalus	17.9	-17.7
Polar	Canadian Arctic	Benthic	Bathyal	Annelida	Polychaeta	Terebellides stroemi	16.5	-19
Polar	Canadian Arctic	Benthic	Bathyal	Mollusca	Bivalvia	Thyasiridae	12.4	-21.2
Polar	Canadian Arctic	Benthic	Bathyal	Mollusca	Bivalvia	Yoldiidae	14.2	-18.8
Polar	Northeast Atlantic	Demersal	Bathyal	Chordata	Actinopterigii	Argentina sphyraena	12.6647	-20.8396
Polar	Northeast Atlantic	Demersal	Bathyal	Chordata	Actinopterigii	Argentina sphyraena	12.9776	-18.6109
Polar	Northeast Atlantic	Benthic	Bathyal	Chordata	Actinopterigii	Artediellus atlanticus	12.3801	-18.5001
Polar	Northeast Atlantic	Demersal	Bathyal	Chordata	Actinopterigii	Artediellus atlanticus	11.634	-18.6893
Polar	Northeast Atlantic	Demersal	Bathyal	Chordata	Tunicata	Ascidia sp.	13.3666	-20.5867
Polar	Northeast Atlantic	Benthic	Bathyal	Annelida	Polychaeta	Bonellia sp.	10.3775	-18.7537
Polar	Northeast Atlantic	Benthic	Bathyal	Brachiopoda		Brachiopoda sp.	11.1202	-20.4858
Polar	Northeast Atlantic	Demersal	Bathyal	Chordata	Actinopterigii	Brosme brosme	14.4237	-19.0414
Polar	Northeast Atlantic	Demersal	Bathyal	Chordata	Actinopterigii	Brosme brosme	14.4237	-19.0414
Polar	Northeast Atlantic	Demersal	Bathyal	Chordata	Actinopterigii	Brosme brosme	13.7644	-18.9212
Polar	Northeast Atlantic	Demersal	Bathyal	Chordata	Actinopterigii	Brosme brosme	13.7644	-18.9212
Polar	Northeast Atlantic	Demersal	Bathyal	Chordata	Actinopterigii	Brosme brosme	13.4729	-20.3536
Polar	Northeast Atlantic	Demersal	Bathyal	Chordata	Actinopterigii	Brosme brosme	13.4729	-20.3536
Polar	Northeast Atlantic	Demersal	Bathyal	Chordata	Actinopterigii	Brosme brosme	13.0379	-18.8392
Polar	Northeast Atlantic	Demersal	Bathyal	Chordata	Actinopterigii	Brosme brosme	13.0379	-18.8392
Polar	Northeast Atlantic	Demersal	Bathyal	Chordata	Actinopterigii	Brosme brosme	13.5667	-18.856
Polar	Northeast Atlantic	Demersal	Bathyal	Chordata	Actinopterigii	Brosme brosme	13.5667	-18.856
Polar	Northeast Atlantic	Demersal	Bathyal	Chordata	Actinopterigii	Brosme brosme	13.6274	-18.9614
Polar	Northeast Atlantic	Demersal	Bathyal	Chordata	Actinopterigii	Brosme brosme	13.6274	-18.9614
Polar	Northeast Atlantic	Demersal	Bathyal	Arthropoda	Hexanauplia	Calanus sp.	5.40397	-23.8951
Polar	Northeast Atlantic	Demersal	Bathyal	Arthropoda	Hexanauplia	Calanus sp.	5.68611	-24.0178
Polar	Northeast Atlantic	Demersal	Bathyal	Arthropoda	Hexanauplia	Calanus sp.	5.32365	-24.575
Polar	Northeast Atlantic	Demersal	Bathyal	Arthropoda	Hexanauplia	Calanus sp.	5.39192	-24.4503
Polar	Northeast Atlantic	Demersal	Bathyal	Chordata	Actinopterigii	Chimaera monstrosa	13.5782	-17.9114
Polar	Northeast Atlantic	Demersal	Bathyal	Chordata	Actinopterigii	Chimaera monstrosa	13.5773	-18.2409
Polar	Northeast Atlantic	Benthic	Bathyal	Cnidaria	Anthozoa	Desmophyllum pertusum	8.94581	-24.5837
Polar	Northeast Atlantic	Benthic	Bathyal	Cnidaria	Anthozoa	Desmophyllum pertusum	8.94581	-24.5837
Polar	Northeast Atlantic	Benthic	Bathyal	Cnidaria	Anthozoa	Desmophyllum pertusum	7.53296	-24.3371
Polar	Northeast Atlantic	Benthic	Bathyal	Cnidaria	Anthozoa	Desmophyllum pertusum	7.53296	-24.3371
Polar	Northeast Atlantic	Benthic	Bathyal	Echinodermata	Asteroidea	Henricia pertusa	16.604	-15.8428
Polar	Northeast Atlantic	Benthic	Bathyal	Echinodermata	Asteroidea	Henricia pertusa	16.6155	-17.6502
Polar	Northeast Atlantic	Benthic	Bathyal	Echinodermata	Asteroidea	Henricia pertusa	17.3625	-17.5572
Polar	Northeast Atlantic	Benthic	Bathyal	Echinodermata	Asteroidea	Henricia pertusa	15.9474	-16.7936
Polar	Northeast Atlantic	Demersal	Bathyal	Chordata	Actinopterigii	Hippoglossoides platessoides	11.7151	-19.3787
Polar	Northeast Atlantic	Demersal	Bathyal	Chordata	Actinopterigii	Hippoglossoides platessoides	11.8961	-19.7487
Polar	Northeast Atlantic	Demersal	Bathyal	Chordata	Actinopterigii	Hippoglossoides platessoides	11.8849	-19.5296
Polar	Northeast Atlantic	Benthic	Bathyal	Arthropoda	Malacostraca	Lithodes maja	12.0792	-18.4539
Polar	Northeast Atlantic	Pelagic	Mesopelagic	Chordata	Actinopterigii	Maurolicus muelleri	10.3899	-22.3301
Polar	Northeast Atlantic	Pelagic	Mesopelagic	Chordata	Actinopterigii	Maurolicus muelleri	13.4103	-22.335
Polar	Northeast Atlantic	Pelagic	Mesopelagic	Arthropoda	Malacostraca	Meganyctiphanes norvegica	9.12869	-21.7526
Polar	Northeast Atlantic	Pelagic	Mesopelagic	Arthropoda	Malacostraca	Meganyctiphanes norvegica	9.52048	-21.7031
Polar	Northeast Atlantic	Pelagic	Mesopelagic	Arthropoda	Malacostraca	Meganyctiphanes norvegica	9.53021	-21.299
Polar	Northeast Atlantic	Benthic	Bathyal	Porifera	Demospongiae	mix of large sponges	8.61399	-18.758
Polar	Northeast Atlantic	Benthic	Bathyal	Porifera	Demospongiae	mix of large sponges	15.672	-19.0656
Polar	Northeast Atlantic	Benthic	Bathyal	Porifera	Demospongiae	mix of large sponges	19.85	-18.0994
Polar	Northeast Atlantic	Benthic	Bathyal	Porifera	Demospongiae	mix of large sponges	31.1197	-12.6709
Polar	Northeast Atlantic	Benthic	Bathyal	Porifera	Demospongiae	mix of large sponges	34.8117	-13.2012
Polar	Northeast Atlantic	Benthic	Bathyal	Porifera	Demospongiae	mix of large sponges	11.4774	-19.1512
Polar	Northeast Atlantic	Benthic	Bathyal	Porifera	Demospongiae	mix of large sponges	15.9298	-18.0279
Polar	Northeast Atlantic	Benthic	Bathyal	Porifera	Demospongiae	mix of large sponges	14.5955	-18.5766
Polar	Northeast Atlantic	Benthic	Bathyal	Porifera	Demospongiae	mix of large sponges	31.5683	-14.9033
Polar	Northeast Atlantic	Benthic	Bathyal	Porifera	Demospongiae	mix of large sponges	9.47272	-18.4741
Polar	Northeast Atlantic	Benthic	Bathyal	Porifera	Demospongiae	mix of large sponges	8.99042	-18.7594
Polar	Northeast Atlantic	Benthic	Bathyal	Porifera	Demospongiae	mix of large sponges	9.95852	-17.9931
Polar	Northeast Atlantic	Benthic	Bathyal	Porifera	Demospongiae	mix of large sponges	13.1971	-18.7968
Polar	Northeast Atlantic	Benthic	Bathyal	Porifera	Demospongiae	mix of large sponges	13.4661	-19.3328
Polar	Northeast Atlantic	Benthic	Bathyal	Porifera	Demospongiae	mix of large sponges	8.68621	-18.4182
Polar	Northeast Atlantic	Benthic	Bathyal	Porifera	Demospongiae	mix of large sponges	8.2419	-18.4473
Polar	Northeast Atlantic	Benthic	Bathyal	Porifera	Demospongiae	mix of large sponges	14.4062	-20.4541
Polar	Northeast Atlantic	Benthic	Bathyal	Porifera	Demospongiae	mix of large sponges	9.87135	-24.1846
Polar	Northeast Atlantic	Demersal	Bathyal	Arthropoda	Malacostraca	Munida rugosa	9.73277	-19.15
Polar	Northeast Atlantic	Demersal	Bathyal	Arthropoda	Malacostraca	Munida rugosa	10.9121	-19.1454
Polar	Northeast Atlantic	Demersal	Bathyal	Arthropoda	Malacostraca	Munida rugosa	10.5383	-19.3166
Polar	Northeast Atlantic	Benthic	Bathyal	Echinodermata	Ophiuroidea	Ophiopholis aculeata	9.84208	-20.0479
Polar	Northeast Atlantic	Benthic	Bathyal	Echinodermata	Ophiuroidea	Ophiopholis aculeata	10.6592	-21.7366
Polar	Northeast Atlantic	Benthic	Bathyal	Echinodermata	Ophiuroidea	Ophiopholis aculeata	9.82593	-19.1056
Polar	Northeast Atlantic	Benthic	Bathyal	Echinodermata	Ophiuroidea	Ophiopholis aculeata	9.58257	-21.1803
Polar	Northeast Atlantic	Pelagic	Mesopelagic	Arthropoda	Malacostraca	Pandalus borealis	11.1732	-19.2576
Polar	Northeast Atlantic	Pelagic	Mesopelagic	Arthropoda	Malacostraca	Pandalus borealis	11.8704	-18.6383
Polar	Northeast Atlantic	Pelagic	Mesopelagic	Arthropoda	Malacostraca	Pandalus borealis	11.8359	-19.2129
Polar	Northeast Atlantic	Pelagic	Mesopelagic	Arthropoda	Malacostraca	Pandalus borealis	12.1547	-19.4166
Polar	Northeast Atlantic	Pelagic	Mesopelagic	Arthropoda	Malacostraca	Pandalus borealis	12.3297	-18.6652
Polar	Northeast Atlantic	Pelagic	Mesopelagic	Arthropoda	Malacostraca	Pandalus borealis	11.9761	-19.3947
Polar	Northeast Atlantic	Pelagic	Mesopelagic	Arthropoda	Malacostraca	Pandalus borealis	11.8778	-19.2858
Polar	Northeast Atlantic	Benthic	Bathyal	Echinodermata	Holothuroidea	Parastichopus tremulus	8.9147	-20.6672
Polar	Northeast Atlantic	Demersal	Bathyal	Chordata	Actinopterigii	Phycis blennoides	12.6345	-19.7665
Polar	Northeast Atlantic	Demersal	Bathyal	Chordata	Actinopterigii	Phycis blennoides	14.2076	-19.7203
Polar	Northeast Atlantic	Demersal	Bathyal	Chordata	Actinopterigii	Pollachius virens	11.6091	-20.0594
Polar	Northeast Atlantic	Demersal	Bathyal	Chordata	Actinopterigii	Pollachius virens	11.6533	-20.2917
Polar	Northeast Atlantic	Demersal	Bathyal	Chordata	Actinopterigii	Sebastes viviparus	12.8722	-19.4905
Polar	Northeast Atlantic	Benthic	Bathyal	Mollusca	Cephalopoda	Sepiola atlantica	11.9367	-20.9375
Polar	Northeast Atlantic	Benthic	Bathyal	Mollusca	Cephalopoda	Sepiola atlantica	11.0423	-20.2718
Polar	Northeast Atlantic	Pelagic	Mesopelagic	Arthropoda	Malacostraca	Thysanoessa inermis	9.7364	-21.1998
Polar	Northeast Atlantic	Pelagic	Mesopelagic	Arthropoda	Malacostraca	Thysanoessa inermis	8.75619	-20.4082
Polar	Northeast Atlantic	Demersal	Bathyal	Chordata	Actinopterigii	Trisopterus esmarkii	10.5349	-21.1741
Polar	Northeast Atlantic	Demersal	Bathyal	Chordata	Actinopterigii	Trisopterus esmarkii	10.5986	-21.0723
Polar	Northeast Atlantic	Demersal	Bathyal	Chordata	Actinopterigii	Trisopterus esmarkii	9.95369	-21.2517
Polar	Northeast Atlantic	Demersal	Bathyal	Chordata	Actinopterigii	Trisopterus esmarkii	10.1078	-21.2367
Polar	Northeast Atlantic	Demersal	Bathyal	Chordata	Actinopterigii	Trisopterus esmarkii	8.56842	-21.0014
Polar	Northeast Atlantic	Demersal	Bathyal	Chordata	Actinopterigii	Trisopterus esmarkii	11.7694	-20.5552
Polar	Svalbard	Benthic	Bathyal-Abyssal	Cnidaria	Anthozoa	Acontiaria gen. et sp. nov.	10.8	-21.6
Polar	Svalbard	Benthic	Bathyal-Abyssal	Cnidaria	Anthozoa	Amphianthus sp 1	11.4	-21.8
Polar	Svalbard	Benthic	Bathyal-Abyssal	Cnidaria	Anthozoa	Amphianthus sp 2	11.3	-22.1
Polar	Svalbard	Benthic	Bathyal-Abyssal	Cnidaria	Anthozoa	Amphianthus sp 4, Isophelliidae gen.1	9.8	-22.6
Polar	Svalbard	Benthic	Bathyal-Abyssal	Chordata	Ascidiacea	Ascidiacea	13.1	-18.9
Polar	Svalbard	Benthic	Bathyal-Abyssal	Arthropoda	Pantopoda	Ascorhynchus abyssi	9.7	-21.6
Polar	Svalbard	Benthic	Bathyal-Abyssal	Porifera	Demospongiae	Axinellidae sp.	7.8	-23
Polar	Svalbard	Benthic	Bathyal-Abyssal	Echinodermata	Asteroidea	Bathybiaster vexillifer	15.8	-17.1
Polar	Svalbard	Benthic	Bathyal-Abyssal	Echinodermata	Asteroidea	Bathybiaster vexillifer	16.8	-17.1
Polar	Svalbard	Benthic	Bathyal-Abyssal	Echinodermata	Asteroidea	Bathybiaster vexillifer	17	-17.1
Polar	Svalbard	Benthic	Bathyal-Abyssal	Echinodermata	Crinoidea	Bathycrinus cf. carpenteri	8.3	-23.1
Polar	Svalbard	Benthic	Bathyal-Abyssal	Echinodermata	Crinoidea	Bathycrinus cf. carpenteri	10.4	-22.2
Polar	Svalbard	Benthic	Bathyal-Abyssal	Echinodermata	Crinoidea	Bathycrinus cf. carpenteri	11	-22.8
Polar	Svalbard	Benthic	Bathyal-Abyssal	Cnidaria	Anthozoa	Bathyphellia margaritacea	11.2	-21.4
Polar	Svalbard	Benthic	Bathyal-Abyssal	Cnidaria	Anthozoa	Bathyphellia margaritacea	11.9	-21.9
Polar	Svalbard	Benthic	Bathyal-Abyssal	Cnidaria	Anthozoa	Bathyphellia margaritacea	16.6	-19.6
Polar	Svalbard	Benthic	Bathyal-Abyssal	Annelida	Polychaeta	Bylgides cf. groenlandica	11.8	-19.8
Polar	Svalbard	Benthic	Bathyal-Abyssal	Arthropoda	Malacostraca	Bythocaris spp.	15.2	-18.3
Polar	Svalbard	Benthic	Bathyal-Abyssal	Arthropoda	Malacostraca	Bythocaris spp.	13	-19.6
Polar	Svalbard	Benthic	Bathyal-Abyssal	Arthropoda	Malacostraca	Bythocaris spp.	13.2	-19.4
Polar	Svalbard	Benthic	Bathyal-Abyssal	Arthropoda	Malacostraca	Bythocaris spp.	13.8	-19.7
Polar	Svalbard	Benthic	Bathyal-Abyssal	Arthropoda	Malacostraca	Caecognathia stygia	9.7	-21.9
Polar	Svalbard	Benthic	Bathyal-Abyssal	Arthropoda	Malacostraca	Caecognathia stygia	10.4	-22.1
Polar	Svalbard	Benthic	Bathyal-Abyssal	Porifera	Hexactinellida	Caulophacus arcticus	12.2	-21.2
Polar	Svalbard	Benthic	Bathyal-Abyssal	Porifera	Demospongiae	Cladorhiza gelida	9.1	-19.5
Polar	Svalbard	Benthic	Bathyal-Abyssal	Porifera	Demospongiae	Cladorhiza gelida	9.6	-18.2
Polar	Svalbard	Benthic	Bathyal-Abyssal	Porifera	Demospongiae	Cladorhiza gelida	11.2	-21.2
Polar	Svalbard	Benthic	Bathyal-Abyssal	Arthropoda	Pantopoda	Colossendeis proboscidea	12.2	-18
Polar	Svalbard	Benthic	Bathyal-Abyssal	Arthropoda	Pantopoda	Colossendeis proboscidea	9.5	-19.7
Polar	Svalbard	Benthic	Bathyal-Abyssal	Mollusca	Gastropoda	Cryptonatica affinis	9.7	-19.1
Polar	Svalbard	Benthic	Bathyal-Abyssal	Arthropoda	Malacostraca	Diastylis spp.	5.4	-21.6
Polar	Svalbard	Benthic	Bathyal-Abyssal	Echinodermata	Holothuroidea	Elpidia heckeri	6	-22.2
Polar	Svalbard	Benthic	Bathyal-Abyssal	Porifera	Demospongiae	Esperiopsis sp.	11.3	-21.3
Polar	Svalbard	Benthic	Bathyal-Abyssal	Porifera	Demospongiae	Esperiopsis sp.	16.6	-19.5
Polar	Svalbard	Benthic	Bathyal-Abyssal	Arthropoda	Malacostraca	Eurythenes gryllus	14.8	-22.1
Polar	Svalbard	Benthic	Bathyal-Abyssal	Arthropoda	Malacostraca	Eurythenes gryllus	12.8	-22.8
Polar	Svalbard	Benthic	Bathyal-Abyssal	Arthropoda	Malacostraca	Eurythenes gryllus	12.7	-21.7
Polar	Svalbard	Benthic	Bathyal-Abyssal	Cnidaria	Anthozoa	Gersemia rubiformis	8.9	-21.7
Polar	Svalbard	Benthic	Bathyal-Abyssal	Cnidaria	Anthozoa	Gersemia rubiformis	11.2	-21.9
Polar	Svalbard	Benthic	Bathyal-Abyssal	Arthropoda	Malacostraca	Halirages quadridentatus	10	-21.3
Polar	Svalbard	Benthic	Bathyal-Abyssal	Annelida	Echiura	Hamingia arctica	12.9	-18
Polar	Svalbard	Benthic	Bathyal-Abyssal	Annelida	Echiura	Hamingia arctica	14.7	-16
Polar	Svalbard	Benthic	Bathyal-Abyssal	Arthropoda	Malacostraca	Haploops sp.	8.7	-22.1
Polar	Svalbard	Benthic	Bathyal-Abyssal	Cnidaria	Anthozoa	Hormathiidae cf. Amphianthus sp.	12.2	-22
Polar	Svalbard	Benthic	Bathyal-Abyssal	Echinodermata	Asteroidea	Hymenaster pellucidus	13.1	-19.5
Polar	Svalbard	Benthic	Bathyal-Abyssal	Echinodermata	Asteroidea	Hymenaster pellucidus	11.9	-19.9
Polar	Svalbard	Benthic	Bathyal-Abyssal	Echinodermata	Asteroidea	Hymenaster pellucidus	24.6	-19.5
Polar	Svalbard	Benthic	Bathyal-Abyssal	Cnidaria	Anthozoa	Kadosactis rosea	15.3	-19.1
Polar	Svalbard	Benthic	Bathyal-Abyssal	Mollusca	Bivalvia	Katadesmia kolthoffi	10.5	-19.7
Polar	Svalbard	Benthic	Bathyal-Abyssal	Arthropoda	Malacostraca	Liljeborgia fissicornis	10.9	-19.8
Polar	Svalbard	Benthic	Bathyal-Abyssal	Arthropoda	Malacostraca	Lysianassidae cf. tryphosa	14.2	-23.4
Polar	Svalbard	Benthic	Bathyal-Abyssal	Arthropoda	Malacostraca	Mesidothea megalura	11.3	-19.6
Polar	Svalbard	Benthic	Bathyal-Abyssal	Arthropoda	Malacostraca	Mesidothea megalura	10.5	-19.6
Polar	Svalbard	Benthic	Bathyal-Abyssal	Mollusca	Gastropoda	Mohnia mohni, Tacita danielsseni	13.4	-18.2
Polar	Svalbard	Benthic	Bathyal-Abyssal	Mollusca	Gastropoda	Mohnia mohni, Tacita danielsseni	10.9	-19
Polar	Svalbard	Benthic	Bathyal-Abyssal	Mollusca	Gastropoda	Mohnia mohni, Tacita danielsseni	13.2	-18
Polar	Svalbard	Benthic	Bathyal-Abyssal	Mollusca	Gastropoda	Mohnia mohni, Tacita danielsseni	10.6	-19.7
Polar	Svalbard	Benthic	Bathyal-Abyssal	Nemertea		Nemertea sp.	12.4	-19
Polar	Svalbard	Benthic	Bathyal-Abyssal	Annelida	Polychaeta	Nereis cf. gracilis	15.8	-18
Polar	Svalbard	Benthic	Bathyal-Abyssal	Echinodermata	Asteroidea	Poraniomorpha tumida	21.3	-17.3
Polar	Svalbard	Benthic	Bathyal-Abyssal	Annelida	Polychaeta	Praxillura longissima	15.1	-21.3
Polar	Svalbard	Benthic	Bathyal-Abyssal	Annelida	Priapulidae	Priapulus caudatus	13.8	-17.2
Polar	Svalbard	Benthic	Bathyal-Abyssal	Porifera	Demospongiae	Tentorium semisuberites	13	-21.8
Polar	Svalbard	Benthic	Bathyal-Abyssal	Cnidaria	Hydrozoa	Thecate hydroid	7.6	-23.1
Polar	Svalbard	Benthic	Bathyal-Abyssal	Cnidaria	Hydrozoa	Turbulariidae cf. Bouillonia cornucopia	6.3	-22.7
Polar	Svalbard	Benthic	Bathyal-Abyssal	Arthropoda	Malacostraca	Unciola sp.	5.6	-21.1
Polar	Svalbard	Benthic	Bathyal-Abyssal	Arthropoda	Hexanauplia	Verum striolatum	11.3	-21.5
Polar	Svalbard	Benthic	Bathyal-Abyssal	Arthropoda	Hexanauplia	Verum striolatum	10	-22.2
Temperate	central Mediterranean	Pelagic	Bathypelagic	Arthropoda	Malacostraca	Acanthephyra eximia	6.71	-17.89
Temperate	central Mediterranean	Pelagic	Bathypelagic	Arthropoda	Malacostraca	Acanthephyra eximia	7.38	-18.01
Temperate	central Mediterranean	Pelagic	Bathypelagic	Arthropoda	Malacostraca	Acanthephyra pelagica	6.01	-17.83
Temperate	central Mediterranean	Pelagic	Bathypelagic	Arthropoda	Malacostraca	Acanthephyra pelagica	4.67	-19.25
Temperate	central Mediterranean	Pelagic	Bathypelagic	Chordata	Actinopterygii	Argyropelecus hemigymnus	6.76	-18.41
Temperate	central Mediterranean	Benthic	Bathyal	Arthropoda	Malacostraca	Aristeus antennatus	8.34	-17.39
Temperate	central Mediterranean	Benthic	Bathyal	Arthropoda	Malacostraca	Aristeus antennatus	6.97	-17.79
Temperate	central Mediterranean	Benthic	Bathyal	Mollusca	Bivalvia	Asperarca nodulosa	6.7	-17.4
Temperate	central Mediterranean	Demersal	Bathyal	Chordata	Actinopterygii	Bathypterois dubius	10.03	-17.9
Temperate	central Mediterranean	Demersal	Bathyal	Chordata	Actinopterygii	Bathypterois dubius	10.23	-17.63
Temperate	central Mediterranean	Demersal	Bathyal	Chordata	Actinopterygii	Bathypterois dubius	10.87	-18.15
Temperate	central Mediterranean	Demersal	Bathyal	Chordata	Actinopterygii	Cataetyx laticeps	10.85	-18.79
Temperate	central Mediterranean	Benthic	Bathyal	Echinodermata	Asteroidea	Ceramaster grenadensis	10.6	-15.8
Temperate	central Mediterranean	Benthic	Bathyal	Arthropoda	Malacostraca	Chaceon mediterraneus	10.15	-18.77
Temperate	central Mediterranean	Pelagic	Bathypelagic	Chordata	Actinopterygii	Chauliodus sloani	7.07	-17.75
Temperate	central Mediterranean	Pelagic	Bathypelagic	Chordata	Actinopterygii	Chauliodus sloani	5.03	-19.1
Temperate	central Mediterranean	Demersal	Bathyal	Chordata	Actinopterygii	Chimaera monstrosa	11.16	-14.29
Temperate	central Mediterranean	Benthic	Bathyal	Echinodermata	Echinoidea	Cidaris cidaris	9.3	-14
Temperate	central Mediterranean	Demersal	Bathyal	Chordata	Actinopterygii	Coelorinchus mediterraneus	10.28	-15.86
Temperate	central Mediterranean	Demersal	Bathyal	Chordata	Actinopterygii	Coryphaenoides guentheri	10.62	-15.97
Temperate	central Mediterranean	Demersal	Bathyal	Chordata	Actinopterygii	Coryphaenoides guentheri	11.04	-15.98
Temperate	central Mediterranean	Demersal	Bathyal	Chordata	Actinopterygii	Coryphaenoides mediterraneus	18.6	-18.69
Temperate	central Mediterranean	Demersal	Bathyal	Chordata	Actinopterygii	Coryphaenoides mediterraneus	8.5	-18.2
Temperate	central Mediterranean	Benthic	Bathyal	Mollusca	Bivalvia	Delectopecten vitreus	8	-18.1
Temperate	central Mediterranean	Pelagic	Bathypelagic	Arthropoda	Malacostraca	Deosergestes corniculum	3.79	-19.81
Temperate	central Mediterranean	Benthic	Bathyal	Cnidaria	Anthozoa	Desmophyllum dianthus	8.8	-19.1
Temperate	central Mediterranean	Demersal	Bathyal	Chordata	Elasmobranchii	Etmopterus spinax	9.29	-17.03
Temperate	central Mediterranean	Benthic	Bathyal	Annelida	Polychaeta	Eunice norvegica	10.2	-17.1
Temperate	central Mediterranean	Benthic	Bathyal	Annelida	Polychaeta	Eunice norvegica	10.1	-17.3
Temperate	central Mediterranean	Benthic	Bathyal	Annelida	Polychaeta	Eunice norvegica	10.7	-19.9
Temperate	central Mediterranean	Pelagic	Meso-Bathypelagic	Arthropoda	Malacostraca	Euphausiidae sp.	7.1	-19.3
Temperate	central Mediterranean	Demersal	Bathyal	Chordata	Elasmobranchii	Galeus melastomus	8.14	-15.92
Temperate	central Mediterranean	Demersal	Bathyal	Chordata	Elasmobranchii	Hexanchus griseus	10.58	-14.52
Temperate	central Mediterranean	Demersal	Bathyal	Arthropoda	Malacostraca	Isopoda sp.	6.46	-18.46
Temperate	central Mediterranean	Pelagic	Bathypelagic	Chordata	Actinopterygii	Lampanyctus crocodilus	8.09	-19.58
Temperate	central Mediterranean	Pelagic	Bathypelagic	Chordata	Actinopterygii	Lampanyctus crocodilus	5.57	-20.46
Temperate	central Mediterranean	Benthic	Bathyal	Cnidaria	Anthozoa	Leiopathes glaberrima	7.3	-19.4
Temperate	central Mediterranean	Benthic	Bathyal	Cnidaria	Anthozoa	Leiopathes glaberrima	8.2	-19.6
Temperate	central Mediterranean	Benthic	Bathyal	Cnidaria	Anthozoa	Leiopathes glaberrima	7.3	-20.2
Temperate	central Mediterranean	Pelagic	Bathypelagic	Chordata	Actinopterygii	Lepidion lepidion	10.49	-16.89
Temperate	central Mediterranean	Pelagic	Bathypelagic	Chordata	Actinopterygii	Lepidion lepidion	6.97	-18.34
Temperate	central Mediterranean	Pelagic	Bathypelagic	Chordata	Actinopterygii	Leptocephalus larvae	3.91	-21.6
Temperate	central Mediterranean	Benthic	Bathyal	Cnidaria	Anthozoa	Lophelia pertusa	8	-20.6
Temperate	central Mediterranean	Benthic	Bathyal	Cnidaria	Anthozoa	Lophelia pertusa	10.1	-19.1
Temperate	central Mediterranean	Benthic	Bathyal	Cnidaria	Anthozoa	Madrepora oculata	7.3	-20.7
Temperate	central Mediterranean	Benthic	Bathyal	Cnidaria	Anthozoa	Madrepora oculata	8.6	-20.6
Temperate	central Mediterranean	Pelagic	Bathypelagic	Chordata	Actinopterygii	Melanostigma atlanticum	8.51	-18.56
Temperate	central Mediterranean	Pelagic	Bathypelagic	Chordata	Actinopterygii	Mora moro	9.89	-16.59
Temperate	central Mediterranean	Demersal	Bathyal	Arthropoda	Malacostraca	Nematocarcinus exilis	5.66	-17.62
Temperate	central Mediterranean	Demersal	Bathyal	Arthropoda	Malacostraca	Nematocarcinus exilis	6.16	-17.98
Temperate	central Mediterranean	Benthic	Bathyal	Chordata	Actinopterygii	Nettastoma melanurum	9.8	-17.54
Temperate	central Mediterranean	Demersal	Bathyal	Chordata	Actinopterygii	Nezumia sclerorhynchus	11.32	-16.38
Temperate	central Mediterranean	Demersal	Bathyal	Chordata	Actinopterygii	Notacanthus bonaparte	8.5	-17.57
Temperate	central Mediterranean	Benthic	Bathyal	Porifera	Demospongiae	Pachastrella monilifera	7.4	-17.3
Temperate	central Mediterranean	Benthic	Bathyal	Cnidaria	Anthozoa	Paramuricea cf. macrospina	9.7	-18.5
Temperate	central Mediterranean	Pelagic	Bathypelagic	Arthropoda	Malacostraca	Phronima sedentaria	3.27	-19.13
Temperate	central Mediterranean	Benthic	Bathyal	Arthropoda	Malacostraca	Phrosinidae sp.	6.6	-19.8
Temperate	central Mediterranean	Demersal	Bathyal	Chordata	Actinopterygii	Phycis blennoides	12.51	-16
Temperate	central Mediterranean	Benthic	Bathyal	Arthropoda	Malacostraca	Platyscelidae sp.	5.8	-19.8
Temperate	central Mediterranean	Benthic	Bathyal	Porifera	Demospongiae	Poecillastra compressa	11.1	-18.6
Temperate	central Mediterranean	Benthic	Bathyal	Arthropoda	Malacostraca	Polycheles typhlops	8.87	-17.03
Temperate	central Mediterranean	Pelagic	Bathypelagic	Chordata	Thaliacea	Pyrosoma atlanticum	1.59	-21.75
Temperate	central Mediterranean	Pelagic	Bathypelagic	Arthropoda	Malacostraca	Robustosergia robusta	5.96	-19.13
Temperate	central Mediterranean	Benthic	Bathyal	Arthropoda	Malacostraca	Rochinia rissoana	9.5	-17.8
Temperate	central Mediterranean	Benthic	Bathyal	Annelida	Polychaeta	Serpula cf. vermicularis	6.5	-17.4
Temperate	central Mediterranean	Pelagic	Bathypelagic	Chordata	Actinopterygii	Stomias boa	8.51	-17.23
Temperate	Eastern Mediterranean	Pelagic	Bathypelagic	Arthropoda	Malacostraca	Acanthephyra eximia	4.89	-17.78
Temperate	Eastern Mediterranean	Pelagic	Bathypelagic	Arthropoda	Malacostraca	Acanthephyra eximia	5.84	-17.26
Temperate	Eastern Mediterranean	Pelagic	Bathypelagic	Arthropoda	Malacostraca	Acanthephyra eximia	5.58	-18.38
Temperate	Eastern Mediterranean	Pelagic	Bathypelagic	Chordata	Actinopterygii	Argyropelecus hemigymnus	3.66	-19.67
Temperate	Eastern Mediterranean	Pelagic	Bathypelagic	Chordata	Actinopterygii	Argyropelecus hemigymnus	4.89	-18.62
Temperate	Eastern Mediterranean	Benthic	Bathyal	Arthropoda	Malacostraca	Aristeus antennatus	6.28	-17.45
Temperate	Eastern Mediterranean	Benthic	Bathyal	Arthropoda	Malacostraca	Aristeus antennatus	7.06	-17.4
Temperate	Eastern Mediterranean	Demersal	Bathyal	Chordata	Actinopterygii	Bathypterois dubius	7.68	-17.48
Temperate	Eastern Mediterranean	Demersal	Bathyal	Chordata	Actinopterygii	Bathypterois dubius	7.84	-17.85
Temperate	Eastern Mediterranean	Demersal	Bathyal	Chordata	Actinopterygii	Cataetyx laticeps	8.86	-20.03
Temperate	Eastern Mediterranean	Demersal	Bathyal	Chordata	Actinopterygii	Coryphaenoides mediterraneus	7.27	-16.5
Temperate	Eastern Mediterranean	Demersal	Bathyal	Chordata	Actinopterygii	Coryphaenoides mediterraneus	8.36	-16.6
Temperate	Eastern Mediterranean	Demersal	Bathyal	Chordata	Elasmobranchii	Dalatias licha	7.81	-16.79
Temperate	Eastern Mediterranean	Pelagic	Bathypelagic	Arthropoda	Malacostraca	Deosergestes corniculum	2.43	-19.24
Temperate	Eastern Mediterranean	Demersal	Bathyal	Chordata	Elasmobranchii	Galeus melastomus	7.72	-16.35
Temperate	Eastern Mediterranean	Pelagic	Bathypelagic	Chordata	Actinopterygii	Lepidion lepidion	6.92	-18.44
Temperate	Eastern Mediterranean	Pelagic	Bathypelagic	Chordata	Actinopterygii	Leptocephalus larvae	1.4	-21.04
Temperate	Eastern Mediterranean	Pelagic	Bathypelagic	Chordata	Actinopterygii	Mora moro	8.81	-16.34
Temperate	Eastern Mediterranean	Demersal	Bathyal	Arthropoda	Malacostraca	Nematocarcinus exilis	4.36	-17.91
Temperate	Eastern Mediterranean	Demersal	Bathyal	Arthropoda	Malacostraca	Nematocarcinus exilis	4.18	-17.88
Temperate	Eastern Mediterranean	Benthic	Bathyal	Chordata	Actinopterygii	Nettastoma melanurum	7.72	-16.71
Temperate	Eastern Mediterranean	Demersal	Bathyal	Chordata	Actinopterygii	Nezumia sclerorhynchus	9.41	-16.93
Temperate	Eastern Mediterranean	Demersal	Bathypelagic	Arthropoda	Malacostraca	Pasiphaea multidentata	4.52	-17.76
Temperate	Eastern Mediterranean	Demersal	Bathyal	Arthropoda	Malacostraca	Plesionika acanthonotus	5.06	-17.24
Temperate	Eastern Mediterranean	Benthic	Bathyal	Arthropoda	Malacostraca	Polycheles typhlops	7.3	-17.13
Temperate	Eastern Mediterranean	Benthic	Bathyal	Arthropoda	Malacostraca	Polycheles typhlops	6.17	-16.8
Temperate	Eastern Mediterranean	Pelagic	Bathypelagic	Chordata	Thaliacea	Pyrosoma atlanticum	1.22	-21.39
Temperate	Eastern Mediterranean	Pelagic	Bathypelagic	Arthropoda	Malacostraca	Robustosergia robusta	3.39	-19.28
Temperate	eastern North Pacific	Benthic	Bathyal	Arthropoda	Malacostraca	Chionoecetes tanneri	13.8	-19.5
Temperate	eastern North Pacific	Benthic	Bathyal	Arthropoda	Malacostraca	Chionoecetes tanneri	13.2	-19.7
Temperate	eastern North Pacific	Benthic	Bathyal	Echinodermata	Asteroidea	Crossaster borealis	18.4	-15.9
Temperate	eastern North Pacific	Benthic	Bathyal	Arthropoda	Malacostraca	Eualus biunguis	14.9	-18
Temperate	eastern North Pacific	Benthic	Bathyal	Arthropoda	Malacostraca	Eualus biunguis	15.2	-19.3
Temperate	eastern North Pacific	Benthic	Bathyal	Arthropoda	Malacostraca	Eualus macrophthalmus	15.8	-18.9
Temperate	eastern North Pacific	Benthic	Bathyal	Arthropoda	Malacostraca	Eualus macrophthalmus	14.5	-18.9
Temperate	eastern North Pacific	Pelagic	Meso-Bathypelagic	Arthropoda	Malacostraca	Euphausia pacifica	13.9	-20.3
Temperate	eastern North Pacific	Pelagic	Meso-Bathypelagic	Arthropoda	Malacostraca	Euphausia pacifica	10.2	-20.8
Temperate	eastern North Pacific	Benthic	Bathyal	Cnidaria	Anthozoa	Hormathiidae	14	-18.1
Temperate	eastern North Pacific	Benthic	Bathyal	Cnidaria	Anthozoa	Hormathiidae	15.3	-15.8
Temperate	eastern North Pacific	Benthic	Bathyal	Echinodermata	Asteroidea	Luidia spp.	18.3	-17.4
Temperate	eastern North Pacific	Benthic	Bathyal	Mollusca	Gastropoda	Neptunea sp.	15.5	-17.7
Temperate	eastern North Pacific	Benthic	Bathyal	Annelida	Polychaeta	Onuphidae	16.2	-18.6
Temperate	eastern North Pacific	Benthic	Bathyal	Echinodermata	Holothuroidea	Parastichopus leukothele	13.5	-16.6
Temperate	eastern North Pacific	Benthic	Bathyal	Echinodermata	Holothuroidea	Pseudostichopus mollis	14.6	-17.6
Temperate	eastern North Pacific	Benthic	Bathyal	Echinodermata	Holothuroidea	Pseudostichopus mollis	15.5	-15.5
Temperate	eastern North Pacific	Benthic	Bathyal	Echinodermata	Holothuroidea	Scotoplanes sp.	13.2	-16
Temperate	eastern North Pacific	Benthic	Bathyal	Echinodermata	Holothuroidea	Scotoplanes sp.	14.2	-16.8
Temperate	eastern North Pacific	Benthic	Bathyal	Echinodermata	Holothuroidea	Scotoplanes sp.	15.2	-17.6
Temperate	North Atlantic	Pelagic	Bathypelagic	Arthropoda	Malacostraca	Acanthephyra sp.	8.38	-18.43
Temperate	North Atlantic	Pelagic	Bathypelagic	Arthropoda	Malacostraca	Acanthephyra sp.	8.93	-18.82
Temperate	North Atlantic	Benthic	Bathyal	Cnidaria	Anthozoa	Anthomastus agaricus	9.56	-16.6
Temperate	North Atlantic	Demersal	Bathyal	Chordata	Actinopterygii	Antimora rostrata	12.28	-18.12
Temperate	North Atlantic	Demersal	Bathyal	Chordata	Actinopterygii	Antimora rostrata	11.87	-18.1
Temperate	North Atlantic	Demersal	Bathyal	Chordata	Actinopterygii	Antimora rostrata	12.22	-18.93
Temperate	North Atlantic	Demersal	Bathyal	Chordata	Actinopterygii	Antimora rostrata	12.09	-18.91
Temperate	North Atlantic	Demersal	Bathyal	Chordata	Actinopterygii	Antimora rostrata	12.43	-18.79
Temperate	North Atlantic	Demersal	Bathyal	Chordata	Actinopterygii	Antimora rostrata	12.36	-19.2
Temperate	North Atlantic	Benthic	Bathyal	Echinodermata	Asteroidea	Bathybiaster vexillifer	13.18	-15.88
Temperate	North Atlantic	Pelagic	Bathypelagic	Chordata	Actinopterygii	Bathylagus euryops	11.25	-19.31
Temperate	North Atlantic	Demersal	Bathyal	Chordata	Actinopterygii	Bathysaurus ferox	13.88	-17.64
Temperate	North Atlantic	Benthic	Bathyal	Echinodermata	Holoturoidea	Benthodytes gosarsi	9.31	-15.66
Temperate	North Atlantic	Benthic	Bathyal	Echinodermata	Holoturoidea	Benthothuria funebris	10.99	-15.21
Temperate	North Atlantic	Benthic	Bathyal	Echinodermata	Holoturoidea	Benthothuria funebris	10.7	-16.78
Temperate	North Atlantic	Demersal	Bathyal	Chordata	Actinopterygii	Coryphaenoides armatus	12.52	-16.86
Temperate	North Atlantic	Demersal	Bathyal	Chordata	Actinopterygii	Coryphaenoides armatus	12.55	-18.02
Temperate	North Atlantic	Demersal	Bathyal	Chordata	Actinopterygii	Coryphaenoides armatus	12.7	-18.52
Temperate	North Atlantic	Demersal	Bathyal	Chordata	Actinopterygii	Coryphaenoides armatus	12.86	-17.26
Temperate	North Atlantic	Demersal	Bathyal	Chordata	Actinopterygii	Coryphaenoides armatus	12.7	-18.76
Temperate	North Atlantic	Demersal	Bathyal	Chordata	Actinopterygii	Coryphaenoides brevibarbis	12.34	-17.09
Temperate	North Atlantic	Demersal	Bathyal	Chordata	Actinopterygii	Coryphaenoides brevibarbis	11.36	-18.33
Temperate	North Atlantic	Demersal	Bathyal	Chordata	Actinopterygii	Coryphaenoides brevibarbis	12.34	-17.78
Temperate	North Atlantic	Demersal	Bathyal	Chordata	Actinopterygii	Coryphaenoides brevibarbis	10.59	-19.04
Temperate	North Atlantic	Demersal	Bathyal	Chordata	Actinopterygii	Coryphaenoides brevibarbis	11.01	-18.87
Temperate	North Atlantic	Demersal	Bathyal	Chordata	Actinopterygii	Coryphaenoides brevibarbis	12.2	-18.19
Temperate	North Atlantic	Demersal	Bathyal	Chordata	Actinopterygii	Coryphaenoides brevibarbis	10.85	-19.44
Temperate	North Atlantic	Demersal	Bathyal	Chordata	Actinopterygii	Coryphaenoides mediterraneus	12.25	-18.1
Temperate	North Atlantic	Demersal	Bathyal	Arthropoda	Malacostraca	Eurythenes gryllus	10.15	-17.72
Temperate	North Atlantic	Benthic	Bathyal	Echinodermata	Asteroidea	Freyella sp.	14.02	-14.76
Temperate	North Atlantic	Demersal	Bathyal	Arthropoda	Malacostraca	Glyphocrangon sculpta	12.02	-15.75
Temperate	North Atlantic	Demersal	Bathyal	Arthropoda	Malacostraca	Glyphocrangon sculpta	12.83	-17.44
Temperate	North Atlantic	Pelagic	Bathypelagic	Arthropoda	Malacostraca	Gnathophausia zoea	10.35	-18.28
Temperate	North Atlantic	Demersal	Bathyal	Chordata	Actinopterygii	Halosauropsis macrochir	12.9	-17.08
Temperate	North Atlantic	Demersal	Bathyal	Chordata	Actinopterygii	Halosauropsis macrochir	12.91	-17.56
Temperate	North Atlantic	Demersal	Bathyal	Chordata	Actinopterygii	Halosauropsis macrochir	13.04	-17.63
Temperate	North Atlantic	Demersal	Bathyal	Chordata	Actinopterygii	Halosauropsis macrochir	13.19	-18.41
Temperate	North Atlantic	Demersal	Bathyal	Chordata	Actinopterygii	Halosauropsis macrochir	13.01	-17.73
Temperate	North Atlantic	Demersal	Bathyal	Chordata	Actinopterygii	Histiobranchus bathybius	11.77	-17.94
Temperate	North Atlantic	Benthic	Bathyal	Echinodermata	Asteroidea	Hymenaster cf.	9.42	-16.01
Temperate	North Atlantic	Benthic	Bathyal	Echinodermata	Asteroidea	Hymenaster membranaceus	9.7	-16.01
Temperate	North Atlantic	Benthic	Bathyal	Echinodermata	Asteroidea	Hyphalaster inermis	10.69	-15.96
Temperate	North Atlantic	Benthic	Bathyal	Arthropoda	Malacostraca	Munidopsis bermudezi	10.88	-17.88
Temperate	North Atlantic	Benthic	Bathyal	Arthropoda	Malacostraca	Munidopsis rostrata	10.66	-16.35
Temperate	North Atlantic	Benthic	Bathyal	Echinodermata	Ophiuroidea	Ophuiroid sp.	11.35	-17.94
Temperate	North Atlantic	Benthic	Bathyal	Echinodermata	Holoturoidea	Paelopatides grisea	11.05	-17.37
Temperate	North Atlantic	Benthic	Bathyal	Echinodermata	Holoturoidea	Peniagone azorica	7.68	-18.36
Temperate	North Atlantic	Benthic	Bathyal	Echinodermata	Holoturoidea	Peniagone longipapillata	8.65	-16.04
Temperate	North Atlantic	Benthic	Bathyal	Echinodermata	Holoturoidea	Peniagone sp. A	7.99	-15.95
Temperate	North Atlantic	Benthic	Bathyal	Echinodermata	Asteroidea	Plutonaster sp.	12.19	-14.55
Temperate	North Atlantic	Demersal	Bathyal	Chordata	Actinopterygii	Polyacanthonotus challengeri	13.47	-15.38
Temperate	North Atlantic	Benthic	Bathyal	Echinodermata	Asteroidea	Porcellanaster cerulus	11.63	-15.88
Temperate	North Atlantic	Benthic	Bathyal	Sipuncula	Sipunculidea	Sipunculus norvegicus	16.18	-16.48
Temperate	North Atlantic	Benthic	Bathyal	Echinodermata	Holoturoidea	Staurocucumis abyssorum	7.92	-16.59
Temperate	North Atlantic	Benthic	Bathyal	Arthropoda	Malacostraca	Stereomastis nana	12.81	-16.18
Temperate	North Atlantic	Benthic	Bathyal	Arthropoda	Malacostraca	Stereomastis nana	11.81	-17.88
Temperate	North Atlantic	Benthic	Bathyal	Echinodermata	Echinoidea	Urechinus naresianus	9.03	-16.69
Temperate	North Atlantic	Demersal	Bathyal	Arthropoda	Malacostraca	Willemoesia forceps	13.72	-18.41
Temperate	Northeast Atlantic	Demersal	Abyssal	Chordata	Actinopterygii	Alepocephalidae	13.91	-17.47
Temperate	Northeast Atlantic	Demersal	Abyssal	Chordata	Actinopterygii	Aphyonidae	10.42	-17.35
Temperate	Northeast Atlantic	Pelagic	Meso-Bathypelagic	Arthropoda	Malacostraca	Acanthephyra pelagica	8.5	-19.9
Temperate	Northeast Atlantic	Benthic	Abyssal	Cnidaria	Anthozoa	Actinauge abyssorum	13.64	-15.11
Temperate	Northeast Atlantic	Benthic	Bathyal	Cnidaria	Anthozoa	Actinauge sp.	9.04865	-19.436
Temperate	Northeast Atlantic	Pelagic	Meso-Bathypelagic	Chordata	Actinopterygii	Alepocephalus agassizii	11.6329	-18.453
Temperate	Northeast Atlantic	Pelagic	Meso-Bathypelagic	Chordata	Actinopterygii	Alepocephalus agassizii	11.037	-18.9805
Temperate	Northeast Atlantic	Demersal	Bathyal	Chordata	Actinopterygii	Alepocephalus bairdii	8.89	-19.7302
Temperate	Northeast Atlantic	Demersal	Bathyal	Chordata	Actinopterygii	Alepocephalus bairdii	7.49	-18.7046
Temperate	Northeast Atlantic	Demersal	Bathyal	Chordata	Actinopterygii	Alepocephalus bairdii	8.13	-18.9007
Temperate	Northeast Atlantic	Demersal	Bathyal	Chordata	Actinopterygii	Alepocephalus bairdii	7.97	-18.7815
Temperate	Northeast Atlantic	Demersal	Bathyal	Chordata	Actinopterygii	Alepocephalus bairdii	7.74	-18.9518
Temperate	Northeast Atlantic	Demersal	Bathyal	Chordata	Actinopterygii	Alepocephalus bairdii	7.75	-19.2173
Temperate	Northeast Atlantic	Demersal	Bathyal	Chordata	Actinopterygii	Alepocephalus bairdii	9.2	-19.3396
Temperate	Northeast Atlantic	Demersal	Bathyal	Chordata	Actinopterygii	Alepocephalus bairdii	9.49	-18.1838
Temperate	Northeast Atlantic	Demersal	Bathyal	Chordata	Actinopterygii	Alepocephalus bairdii	9.47	-19.3945
Temperate	Northeast Atlantic	Demersal	Bathyal	Chordata	Actinopterygii	Alepocephalus bairdii	9.1	-18.8404
Temperate	Northeast Atlantic	Demersal	Bathyal	Chordata	Actinopterygii	Alepocephalus bairdii	10.47	-18.4047
Temperate	Northeast Atlantic	Demersal	Bathyal	Chordata	Actinopterygii	Alepocephalus bairdii	9.85	-18.7675
Temperate	Northeast Atlantic	Demersal	Bathyal	Chordata	Actinopterygii	Alepocephalus bairdii	7.58	-18.9844
Temperate	Northeast Atlantic	Demersal	Bathyal	Chordata	Actinopterygii	Alepocephalus bairdii	10.31	-18.3095
Temperate	Northeast Atlantic	Demersal	Bathyal	Chordata	Actinopterygii	Alepocephalus bairdii	10.28	-18.714
Temperate	Northeast Atlantic	Demersal	Bathyal	Chordata	Actinopterygii	Alepocephalus bairdii	8.87	-18.9018
Temperate	Northeast Atlantic	Demersal	Bathyal	Chordata	Actinopterygii	Alepocephalus bairdii	9.23	-18.8478
Temperate	Northeast Atlantic	Demersal	Bathyal	Chordata	Actinopterygii	Alepocephalus bairdii	9.16	-19.138
Temperate	Northeast Atlantic	Demersal	Bathyal	Chordata	Actinopterygii	Alepocephalus bairdii	9.09	-19.1406
Temperate	Northeast Atlantic	Demersal	Bathyal	Chordata	Actinopterygii	Alepocephalus bairdii	10.31	-18.6114
Temperate	Northeast Atlantic	Demersal	Bathyal	Chordata	Actinopterygii	Alepocephalus bairdii	9.58	-19.0806
Temperate	Northeast Atlantic	Demersal	Bathyal	Chordata	Actinopterygii	Alepocephalus bairdii	10.45	-19.1832
Temperate	Northeast Atlantic	Demersal	Bathyal	Chordata	Actinopterygii	Alepocephalus bairdii	10.5	-18.4124
Temperate	Northeast Atlantic	Demersal	Bathyal	Chordata	Actinopterygii	Alepocephalus bairdii	11.22	-18.4586
Temperate	Northeast Atlantic	Demersal	Bathyal	Chordata	Actinopterygii	Alepocephalus bairdii	10.42	-18.2753
Temperate	Northeast Atlantic	Demersal	Bathyal	Chordata	Actinopterygii	Alepocephalus bairdii	9.84	-18.4354
Temperate	Northeast Atlantic	Demersal	Bathyal	Chordata	Actinopterygii	Alepocephalus bairdii	10.32	-18.4011
Temperate	Northeast Atlantic	Demersal	Bathyal	Chordata	Actinopterygii	Alepocephalus bairdii	9.37	-18.6812
Temperate	Northeast Atlantic	Demersal	Bathyal	Chordata	Actinopterygii	Alepocephalus bairdii	10.65	-17.8522
Temperate	Northeast Atlantic	Demersal	Bathyal	Chordata	Actinopterygii	Alepocephalus bairdii	10.91	-18.1737
Temperate	Northeast Atlantic	Demersal	Bathyal	Chordata	Actinopterygii	Alepocephalus bairdii	10.23	-18.1988
Temperate	Northeast Atlantic	Demersal	Bathyal	Chordata	Actinopterygii	Alepocephalus bairdii	9.95	-18.6166
Temperate	Northeast Atlantic	Demersal	Bathyal	Chordata	Actinopterygii	Alepocephalus bairdii	10.3511	-18.9174
Temperate	Northeast Atlantic	Demersal	Bathyal	Chordata	Actinopterygii	Alepocephalus bairdii	10.2533	-18.8192
Temperate	Northeast Atlantic	Demersal	Bathyal	Chordata	Actinopterygii	Alepocephalus bairdii	11.6148	-18.6828
Temperate	Northeast Atlantic	Demersal	Bathyal	Chordata	Actinopterygii	Alepocephalus bairdii	10.8678	-18.7959
Temperate	Northeast Atlantic	Demersal	Bathyal	Chordata	Actinopterygii	Alepocephalus bairdii	9.74021	-18.9812
Temperate	Northeast Atlantic	Demersal	Bathyal	Chordata	Actinopterygii	Alepocephalus bairdii	11.9319	-18.349
Temperate	Northeast Atlantic	Demersal	Bathyal	Chordata	Actinopterygii	Alepocephalus bairdii	9.66639	-18.6477
Temperate	Northeast Atlantic	Demersal	Bathyal	Chordata	Actinopterygii	Alepocephalus bairdii	11.2028	-17.9445
Temperate	Northeast Atlantic	Demersal	Bathyal	Chordata	Actinopterygii	Alepocephalus bairdii	10.1077	-18.6317
Temperate	Northeast Atlantic	Demersal	Bathyal	Chordata	Actinopterygii	Alepocephalus bairdii	11.8732	-18.4878
Temperate	Northeast Atlantic	Benthic	Abyssal	Echinodermata	Holothuroidea	Amperima rosea	10.75	-16.89
Temperate	Northeast Atlantic	Benthic	Abyssal	Cnidaria	Anthozoa	Amphianthus bathybium	13.7	-15.85
Temperate	Northeast Atlantic	Demersal	Bathyal	Arthropoda	Malacostraca	Amphipoda sp.	12.9086	-21.9866
Temperate	Northeast Atlantic	Benthic	Bathyal	Cnidaria	Anthozoa	Anthomastus sp.	8.50733	-17.5122
Temperate	Northeast Atlantic	Benthic	Bathyal	Cnidaria	Anthozoa	Anthomastus sp.	7.62755	-22.1324
Temperate	Northeast Atlantic	Demersal	Bathyal-Abyssal	Chordata	Actinopterygii	Antimora rostrata	16.1	-16.5
Temperate	Northeast Atlantic	Pelagic	Meso-Bathypelagic	Chordata	Actinopterygii	Aphanopus carbo	11.5551	-18.3104
Temperate	Northeast Atlantic	Pelagic	Meso-Bathypelagic	Chordata	Actinopterygii	Aphanopus carbo	12.2626	-17.8602
Temperate	Northeast Atlantic	Pelagic	Meso-Bathypelagic	Chordata	Actinopterygii	Aphanopus carbo	12.5616	-18.1828
Temperate	Northeast Atlantic	Pelagic	Meso-Bathypelagic	Chordata	Actinopterygii	Aphanopus carbo	13.4315	-17.6471
Temperate	Northeast Atlantic	Pelagic	Meso-Bathypelagic	Chordata	Actinopterygii	Aphanopus carbo	11.2579	-18.039
Temperate	Northeast Atlantic	Pelagic	Meso-Bathypelagic	Chordata	Actinopterygii	Aphanopus carbo	11.5108	-18.2802
Temperate	Northeast Atlantic	Pelagic	Meso-Bathypelagic	Chordata	Actinopterygii	Aphanopus carbo	11.5986	-18.1141
Temperate	Northeast Atlantic	Pelagic	Meso-Bathypelagic	Chordata	Actinopterygii	Aphanopus carbo	11.5411	-18.2374
Temperate	Northeast Atlantic	Pelagic	Meso-Bathypelagic	Chordata	Actinopterygii	Aphanopus carbo	11.4214	-18.0994
Temperate	Northeast Atlantic	Pelagic	Meso-Bathypelagic	Chordata	Actinopterygii	Aphanopus carbo	12.0359	-18.0902
Temperate	Northeast Atlantic	Pelagic	Meso-Bathypelagic	Chordata	Actinopterygii	Aphanopus carbo	12.0475	-17.9458
Temperate	Northeast Atlantic	Pelagic	Meso-Bathypelagic	Chordata	Actinopterygii	Aphanopus carbo	12.4409	-17.9071
Temperate	Northeast Atlantic	Pelagic	Meso-Bathypelagic	Chordata	Actinopterygii	Aphanopus carbo	12.0941	-18.1476
Temperate	Northeast Atlantic	Benthic	Bathyal	Porifera	Demospongiae	Aphrocallistes sp.	14.466	-18.8313
Temperate	Northeast Atlantic	Benthic	Bathyal	Porifera	Demospongiae	Aphrocallistes sp.	21.9995	-17.7475
Temperate	Northeast Atlantic	Benthic	Bathyal	Porifera	Demospongiae	Aphrocallistes sp.	22.3745	-17.0154
Temperate	Northeast Atlantic	Demersal	Bathyal	Chordata	Actinopterygii	Apristurus aphyodes	12.6835	-16.7336
Temperate	Northeast Atlantic	Demersal	Bathyal	Chordata	Actinopterygii	Apristurus aphyodes	13.0429	-16.7216
Temperate	Northeast Atlantic	Demersal	Bathyal	Chordata	Actinopterygii	Apristurus aphyodes	11.6182	-17.0358
Temperate	Northeast Atlantic	Demersal	Bathyal	Chordata	Actinopterygii	Apristurus aphyodes	13.28	-16.6287
Temperate	Northeast Atlantic	Demersal	Bathyal	Chordata	Actinopterygii	Apristurus aphyodes	13	-16.8101
Temperate	Northeast Atlantic	Demersal	Bathyal	Chordata	Actinopterygii	Apristurus longiceps	12.8341	-17.2938
Temperate	Northeast Atlantic	Demersal	Bathyal	Chordata	Actinopterygii	Apristurus longiceps	13.1326	-17.5896
Temperate	Northeast Atlantic	Demersal	Bathyal	Chordata	Actinopterygii	Apristurus longiceps	13.9209	-17.1524
Temperate	Northeast Atlantic	Demersal	Bathyal	Chordata	Actinopterygii	Apristurus longiceps	13.4883	-17.5367
Temperate	Northeast Atlantic	Pelagic	Meso-Bathypelagic	Chordata	Actinopterygii	Argentina silus	9.47271	-18.4511
Temperate	Northeast Atlantic	Pelagic	Meso-Bathypelagic	Chordata	Actinopterygii	Argentina silus	9.12132	-18.4271
Temperate	Northeast Atlantic	Pelagic	Meso-Bathypelagic	Chordata	Actinopterygii	Argentina silus	10.5505	-18.9418
Temperate	Northeast Atlantic	Pelagic	Meso-Bathypelagic	Chordata	Actinopterygii	Argentina silus	8.60772	-18.2613
Temperate	Northeast Atlantic	Pelagic	Meso-Bathypelagic	Chordata	Actinopterygii	Argentina silus	10.9672	-19.2612
Temperate	Northeast Atlantic	Pelagic	Meso-Bathypelagic	Chordata	Actinopterygii	Argentina silus	9.12188	-18.5886
Temperate	Northeast Atlantic	Pelagic	Meso-Bathypelagic	Chordata	Actinopterygii	Argentina silus	8.54822	-18.2031
Temperate	Northeast Atlantic	Pelagic	Meso-Bathypelagic	Chordata	Actinopterygii	Argentina silus	9.74226	-17.7911
Temperate	Northeast Atlantic	Pelagic	Meso-Bathypelagic	Chordata	Actinopterygii	Argentina silus	9.27042	-18.1093
Temperate	Northeast Atlantic	Pelagic	Meso-Bathypelagic	Chordata	Actinopterygii	Argentina silus	5.97565	-18.2963
Temperate	Northeast Atlantic	Pelagic	Meso-Bathypelagic	Chordata	Actinopterygii	Argentina silus	9.72355	-18.3455
Temperate	Northeast Atlantic	Pelagic	Meso-Bathypelagic	Chordata	Actinopterygii	Argentina silus	10.0277	-18.2044
Temperate	Northeast Atlantic	Pelagic	Meso-Bathypelagic	Chordata	Actinopterygii	Argentina silus	8.81513	-18.0605
Temperate	Northeast Atlantic	Pelagic	Meso-Bathypelagic	Chordata	Actinopterygii	Argentina silus	10.3927	-17.6998
Temperate	Northeast Atlantic	Pelagic	Meso-Bathypelagic	Chordata	Actinopterygii	Argentina silus	8.10783	-17.8639
Temperate	Northeast Atlantic	Pelagic	Meso-Bathypelagic	Chordata	Actinopterygii	Argentina silus	7.83862	-17.9801
Temperate	Northeast Atlantic	Pelagic	Meso-Bathypelagic	Chordata	Actinopterygii	Argentina silus	8.55366	-17.7738
Temperate	Northeast Atlantic	Demersal	Bathyal	Chordata	Actinopterygii	Argentina sphyraena	10.6	-18.5
Temperate	Northeast Atlantic	Benthic	Abyssal	Echinodermata	Asteroidea	Asteroidea sp 1	16.73	-12.89
Temperate	Northeast Atlantic	Benthic	Bathyal	Echinodermata	Asteroidea	Asteroidea spp.	13.0867	-12.5911
Temperate	Northeast Atlantic	Benthic	Bathyal	Echinodermata	Asteroidea	Asteroidea spp.	13.5517	-12.1878
Temperate	Northeast Atlantic	Benthic	Bathyal	Echinodermata	Asteroidea	Asteroidea spp.	15.182	-11.8131
Temperate	Northeast Atlantic	Demersal	Bathyal	Chordata	Actinopterygii	Bathopterys dubius	13.9216	-17.8296
Temperate	Northeast Atlantic	Benthic	Bathyal	Arthropoda	Malacostraca	Bathynectes sp.	11.0568	-17.1142
Temperate	Northeast Atlantic	Benthic	Bathyal	Arthropoda	Malacostraca	Bathynectes sp.	11.408	-16.5721
Temperate	Northeast Atlantic	Benthic	Bathyal	Arthropoda	Malacostraca	Bathynectes sp.	10.5858	-18.1587
Temperate	Northeast Atlantic	Demersal	Abyssal	Annelida	Polychaeta	Bathynoe	13.2	-16.18
Temperate	Northeast Atlantic	Demersal	Bathyal	Mollusca	Cephalopoda	Bathypolypus bairdii	11.6625	-16.1323
Temperate	Northeast Atlantic	Demersal	Bathyal	Mollusca	Cephalopoda	Bathypolypus bairdii	9.19363	-16.9718
Temperate	Northeast Atlantic	Demersal	Abyssal	Chordata	Actinopterygii	Bathypterois longipes	10.92	-17.62
Temperate	Northeast Atlantic	Demersal	Abyssal	Chordata	Actinopterygii	Bathysaurus mollis	15.01	-17.27
Temperate	Northeast Atlantic	Demersal	Abyssal	Arthropoda	Malacostraca	Benthesicymus iriaescens	12.12	-17.98
Temperate	Northeast Atlantic	Benthic	Abyssal	Echinodermata	Holothuroidea	Benthodytes sordida	12.33	-14.19
Temperate	Northeast Atlantic	Demersal	Bathyal	Chordata	Actinopterygii	Beryx spp.	8.6	-19.4
Temperate	Northeast Atlantic	Demersal	Bathyal	Chordata	Actinopterygii	Beryx spp.	9.2	-19.1
Temperate	Northeast Atlantic	Demersal	Bathyal	Chordata	Actinopterygii	Brosme brosme	14.9487	-17.3215
Temperate	Northeast Atlantic	Demersal	Bathyal	Chordata	Actinopterygii	Brosme brosme	14.5519	-17.9015
Temperate	Northeast Atlantic	Demersal	Bathyal	Chordata	Actinopterygii	Brosme brosme	14.628	-16.8779
Temperate	Northeast Atlantic	Benthic	Bathyal	Mollusca	Gastropoda	Buccinum humphreysianum	8.7	-17.4
Temperate	Northeast Atlantic	Benthic	Bathyal	Mollusca	Gastropoda	Calliostoma sp.	11.6928	-17.9515
Temperate	Northeast Atlantic	Benthic	Bathyal	Mollusca	Gastropoda	Calliostoma sp.	11.4996	-17.9321
Temperate	Northeast Atlantic	Benthic	Bathyal	Mollusca	Gastropoda	Calliostoma sp.	12.2162	-17.6605
Temperate	Northeast Atlantic	Demersal	Bathyal	Arthropoda	Malacostraca	Caridea spp.	10.0961	-18.1332
Temperate	Northeast Atlantic	Demersal	Bathyal	Arthropoda	Malacostraca	Caridea spp.	9.91337	-18.2251
Temperate	Northeast Atlantic	Demersal	Bathyal	Arthropoda	Malacostraca	Caridea spp.	8.81851	-19.1338
Temperate	Northeast Atlantic	Demersal	Abyssal	Mollusca	Bivalvia	Caspideridae	16.58	-16.09
Temperate	Northeast Atlantic	Demersal	Bathyal	Chordata	Actinopterigii	Cataetyx alleni	12.1998	-16.8136
Temperate	Northeast Atlantic	Demersal	Bathyal	Chordata	Actinopterigii	Cataetyx alleni	11.0143	-17.5508
Temperate	Northeast Atlantic	Demersal	Bathyal	Chordata	Actinopterygii	Cataetyx laticeps	15.7123	-16.2788
Temperate	Northeast Atlantic	Demersal	Bathyal	Chordata	Actinopterygii	Cataetyx laticeps	15.5795	-15.863
Temperate	Northeast Atlantic	Demersal	Bathyal	Chordata	Actinopterygii	Cataetyx laticeps	14.7358	-16.2056
Temperate	Northeast Atlantic	Demersal	Bathyal	Chordata	Actinopterygii	Cataetyx laticeps	15.0785	-15.9275
Temperate	Northeast Atlantic	Demersal	Bathyal	Chordata	Actinopterygii	Cataetyx laticeps	12.4686	-17.9188
Temperate	Northeast Atlantic	Demersal	Bathyal	Chordata	Actinopterygii	Cataetyx laticeps	14.7255	-15.9736
Temperate	Northeast Atlantic	Demersal	Bathyal	Chordata	Elasmobranchi	Centroscynmus ceololepis	13.87	-16.9807
Temperate	Northeast Atlantic	Demersal	Bathyal	Chordata	Elasmobranchi	Centroscynmus ceololepis	13.85	-16.6571
Temperate	Northeast Atlantic	Demersal	Bathyal	Chordata	Elasmobranchi	Centroscynmus ceololepis	14.6429	-16.5776
Temperate	Northeast Atlantic	Demersal	Bathyal	Chordata	Elasmobranchi	Centroscynmus ceololepis	14.0835	-17.0204
Temperate	Northeast Atlantic	Demersal	Bathyal	Chordata	Elasmobranchi	Centroscynmus ceololepis	14.8198	-16.6968
Temperate	Northeast Atlantic	Demersal	Bathyal	Chordata	Elasmobranchi	Centroscynmus ceololepis	14.46	-17.1765
Temperate	Northeast Atlantic	Demersal	Bathyal	Chordata	Elasmobranchi	Centroscynmus crepidator	12.32	-16.9218
Temperate	Northeast Atlantic	Demersal	Bathyal	Chordata	Elasmobranchi	Centroscynmus crepidator	12.8	-16.5253
Temperate	Northeast Atlantic	Demersal	Bathyal	Chordata	Elasmobranchi	Centroscynmus crepidator	12.97	-16.6273
Temperate	Northeast Atlantic	Demersal	Bathyal	Chordata	Elasmobranchi	Centroscynmus crepidator	12.65	-16.9726
Temperate	Northeast Atlantic	Demersal	Bathyal	Chordata	Elasmobranchi	Centroscynmus crepidator	12.14	-17.2542
Temperate	Northeast Atlantic	Demersal	Bathyal	Chordata	Elasmobranchi	Centroscynmus crepidator	12.55	-17.3586
Temperate	Northeast Atlantic	Demersal	Bathyal	Chordata	Elasmobranchi	Centroscynmus crepidator	11.94	-17.1202
Temperate	Northeast Atlantic	Demersal	Bathyal	Chordata	Elasmobranchi	Centroscynmus crepidator	12.88	-16.9248
Temperate	Northeast Atlantic	Demersal	Bathyal	Chordata	Elasmobranchi	Centroscynmus crepidator	13.46	-16.7839
Temperate	Northeast Atlantic	Demersal	Bathyal	Chordata	Elasmobranchi	Centroscynmus crepidator	12.69	-16.7597
Temperate	Northeast Atlantic	Demersal	Bathyal	Chordata	Elasmobranchi	Centroscynmus crepidator	13.22	-17.2877
Temperate	Northeast Atlantic	Demersal	Bathyal	Chordata	Elasmobranchi	Centroscynmus crepidator	13.56	-17.5385
Temperate	Northeast Atlantic	Demersal	Bathyal	Chordata	Elasmobranchi	Centroscynmus crepidator	12.056	-16.5913
Temperate	Northeast Atlantic	Demersal	Bathyal	Chordata	Elasmobranchi	Centroscynmus crepidator	11.92	-17.3497
Temperate	Northeast Atlantic	Demersal	Bathyal	Chordata	Elasmobranchi	Centroscynmus crepidator	13.04	-16.9476
Temperate	Northeast Atlantic	Demersal	Bathyal	Chordata	Elasmobranchi	Centroscynmus crepidator	12.33	-17.2327
Temperate	Northeast Atlantic	Demersal	Bathyal	Chordata	Elasmobranchi	Centroscynmus crepidator	13.3865	-16.9438
Temperate	Northeast Atlantic	Demersal	Bathyal	Chordata	Elasmobranchi	Centroscynmus crepidator	13.26	-16.6196
Temperate	Northeast Atlantic	Demersal	Bathyal	Chordata	Elasmobranchi	Centroscynmus crepidator	12.81	-16.4604
Temperate	Northeast Atlantic	Demersal	Bathyal	Chordata	Elasmobranchi	Centroscynmus crepidator	13.9981	-16.6506
Temperate	Northeast Atlantic	Demersal	Abyssal	Arthropoda	Malacostraca	cf Paracallisoma sp.	11.75	-18.31
Temperate	Northeast Atlantic	Benthic	Bathyal	Arthropoda	Malacostraca	Chaceon affinis	10.3	-18.2
Temperate	Northeast Atlantic	Demersal	Abyssal	Chordata	Actinopterygii	Chalinura leptolepis	15.23	-17.5
Temperate	Northeast Atlantic	Demersal	Abyssal	Chordata	Actinopterygii	Chalinura profundicola	14.64	-17.8
Temperate	Northeast Atlantic	Demersal	Bathyal	Chordata	Actinopterygii	Chimaera monstrosa	9.3	-17.4
Temperate	Northeast Atlantic	Demersal	Bathyal	Chordata	Actinopterygii	Chimaera monstrosa	10.895	-19.4378
Temperate	Northeast Atlantic	Demersal	Bathyal	Chordata	Actinopterygii	Chimaera monstrosa	9.83302	-19.0928
Temperate	Northeast Atlantic	Demersal	Bathyal	Chordata	Actinopterygii	Chimaera monstrosa	10.7015	-18.7612
Temperate	Northeast Atlantic	Demersal	Bathyal	Chordata	Actinopterygii	Chimaera monstrosa	12.7	-16.8931
Temperate	Northeast Atlantic	Demersal	Bathyal	Chordata	Actinopterygii	Chimaera monstrosa	13.17	-16.8772
Temperate	Northeast Atlantic	Demersal	Bathyal	Chordata	Actinopterygii	Chimaera monstrosa	13.2538	-16.948
Temperate	Northeast Atlantic	Demersal	Bathyal	Chordata	Actinopterygii	Chimaera monstrosa	13.1747	-16.6389
Temperate	Northeast Atlantic	Demersal	Bathyal	Chordata	Actinopterygii	Chimaera monstrosa	11.7605	-18.5095
Temperate	Northeast Atlantic	Demersal	Bathyal	Chordata	Actinopterygii	Chimaera monstrosa	11.3964	-18.5046
Temperate	Northeast Atlantic	Demersal	Bathyal	Chordata	Actinopterygii	Chimaera monstrosa	13.8246	-16.7907
Temperate	Northeast Atlantic	Demersal	Bathyal	Chordata	Actinopterygii	Chimaera monstrosa	13.3311	-16.7798
Temperate	Northeast Atlantic	Demersal	Bathyal	Chordata	Actinopterygii	Chimaera monstrosa	10.8638	-18.7025
Temperate	Northeast Atlantic	Demersal	Bathyal	Chordata	Actinopterygii	Chimaera monstrosa	10.7765	-18.4569
Temperate	Northeast Atlantic	Demersal	Bathyal	Chordata	Actinopterygii	Chimaera monstrosa	14.24	-16.5528
Temperate	Northeast Atlantic	Demersal	Bathyal	Chordata	Actinopterygii	Chimaera monstrosa	14.542	-16.6945
Temperate	Northeast Atlantic	Demersal	Bathyal	Chordata	Actinopterygii	Chimaera monstrosa	13.31	-16.8105
Temperate	Northeast Atlantic	Demersal	Bathyal	Chordata	Actinopterygii	Chimaera monstrosa	13.9262	-16.0252
Temperate	Northeast Atlantic	Demersal	Bathyal	Chordata	Actinopterygii	Chimaera monstrosa	12.6691	-16.7963
Temperate	Northeast Atlantic	Demersal	Bathyal	Chordata	Actinopterygii	Chimaera monstrosa	14.8055	-16.5576
Temperate	Northeast Atlantic	Demersal	Bathyal	Chordata	Actinopterygii	Chimaera monstrosa	16.12	-16.1656
Temperate	Northeast Atlantic	Demersal	Bathyal	Chordata	Actinopterygii	Chimaera monstrosa	15.81	-16.3641
Temperate	Northeast Atlantic	Demersal	Bathyal	Chordata	Actinopterygii	Chimaera monstrosa	15.73	-16.3172
Temperate	Northeast Atlantic	Demersal	Bathyal	Chordata	Actinopterygii	Chimaera monstrosa	15.77	-16.5766
Temperate	Northeast Atlantic	Benthic	Bathyal	Echinodermata	Echinoidea	Cidaris sp.	18.1972	-15.9686
Temperate	Northeast Atlantic	Benthic	Bathyal	Echinodermata	Echinoidea	Cidaris sp.	16.4199	-16.7334
Temperate	Northeast Atlantic	Benthic	Bathyal	Cnidaria	Anthozoa	Cirrhipathes sp.		-17.8878
Temperate	Northeast Atlantic	Benthic	Bathyal	Cnidaria	Anthozoa	Cirrhipathes sp.	7.25596	-18.8513
Temperate	Northeast Atlantic	Benthic	Abyssal	Arthropoda	Maxillopoda	Cirripedia sp 1	14.93	-19.27
Temperate	Northeast Atlantic	Benthic	Abyssal	Arthropoda	Maxillopoda	Cirripedia sp 2	16.91	-16.92
Temperate	Northeast Atlantic	Benthic	Bathyal	Arthropoda	Maxillopoda	Cirripedia spp.	8.08886	-23.0923
Temperate	Northeast Atlantic	Benthic	Bathyal	Arthropoda	Maxillopoda	Cirripedia spp.	7.89362	-23.4211
Temperate	Northeast Atlantic	Benthic	Bathyal	Arthropoda	Maxillopoda	Cirripedia spp.	8.34047	-19.1685
Temperate	Northeast Atlantic	Demersal	Abyssal	Mollusca	Cephalopoda	Cirrotheutidae	13.56	-18.94
Temperate	Northeast Atlantic	Demersal	Bathyal	Chordata	Actinopterygii	Coelorinchus caelorhincus	12.2	-17.4
Temperate	Northeast Atlantic	Demersal	Bathyal	Chordata	Actinopterygii	Coelorinchus caelorhincus	11.7725	-17.8407
Temperate	Northeast Atlantic	Demersal	Bathyal	Chordata	Actinopterygii	Coelorinchus caelorhincus	11.2978	-18.2656
Temperate	Northeast Atlantic	Demersal	Bathyal	Chordata	Actinopterygii	Coelorinchus caelorhincus	10.9039	-18.5376
Temperate	Northeast Atlantic	Demersal	Bathyal	Chordata	Actinopterygii	Coelorinchus caelorhincus	11.4579	-18.2009
Temperate	Northeast Atlantic	Demersal	Bathyal	Chordata	Actinopterygii	Coelorinchus caelorhincus	11.6194	-17.9042
Temperate	Northeast Atlantic	Demersal	Bathyal	Chordata	Actinopterygii	Coelorinchus caelorhincus	11.3112	-17.8399
Temperate	Northeast Atlantic	Demersal	Bathyal	Chordata	Actinopterygii	Coelorinchus caelorhincus	10.7282	-17.7434
Temperate	Northeast Atlantic	Demersal	Bathyal	Chordata	Actinopterygii	Coelorinchus caelorhincus	11.9086	-17.3352
Temperate	Northeast Atlantic	Demersal	Bathyal	Chordata	Actinopterygii	Coelorinchus caelorhincus	11.3779	-17.3692
Temperate	Northeast Atlantic	Demersal	Bathyal	Chordata	Actinopterigii	Coelorinchus caudani	11.7673	-16.8228
Temperate	Northeast Atlantic	Demersal	Abyssal	Chordata	Actinopterygii	Conocara salmonea	13.54	-16.27
Temperate	Northeast Atlantic	Demersal	Abyssal	Chordata	Actinopterygii	Coryphaenoides armatus	15.02	-18.07
Temperate	Northeast Atlantic	Demersal	Bathyal-Abyssal	Chordata	Actinopterygii	Coryphaenoides armatus	16.7	-16.8
Temperate	Northeast Atlantic	Demersal	Bathyal-Abyssal	Chordata	Actinopterygii	Coryphaenoides guentheri	18.1	-16.4
Temperate	Northeast Atlantic	Demersal	Bathyal	Chordata	Actinopterygii	Coryphaenoides guntheri	12.08	-17.2557
Temperate	Northeast Atlantic	Demersal	Bathyal	Chordata	Actinopterygii	Coryphaenoides guntheri	12.79	-17.5709
Temperate	Northeast Atlantic	Demersal	Bathyal	Chordata	Actinopterygii	Coryphaenoides guntheri	12.85	-17.4891
Temperate	Northeast Atlantic	Demersal	Bathyal	Chordata	Actinopterygii	Coryphaenoides guntheri	13.38	-17.4398
Temperate	Northeast Atlantic	Demersal	Bathyal	Chordata	Actinopterygii	Coryphaenoides guntheri	13.17	-17.3667
Temperate	Northeast Atlantic	Demersal	Bathyal	Chordata	Actinopterygii	Coryphaenoides guntheri	11.99	-17.3294
Temperate	Northeast Atlantic	Demersal	Bathyal	Chordata	Actinopterygii	Coryphaenoides guntheri	13.02	-18.0333
Temperate	Northeast Atlantic	Demersal	Bathyal	Chordata	Actinopterygii	Coryphaenoides guntheri	12.72	-17.369
Temperate	Northeast Atlantic	Demersal	Bathyal	Chordata	Actinopterygii	Coryphaenoides guntheri	12.54	-17.0359
Temperate	Northeast Atlantic	Demersal	Bathyal	Chordata	Actinopterygii	Coryphaenoides guntheri	12.87	-17.1627
Temperate	Northeast Atlantic	Demersal	Bathyal	Chordata	Actinopterygii	Coryphaenoides guntheri	12.95	-17.6116
Temperate	Northeast Atlantic	Demersal	Bathyal	Chordata	Actinopterygii	Coryphaenoides guntheri	12.57	-17.2067
Temperate	Northeast Atlantic	Demersal	Bathyal	Chordata	Actinopterygii	Coryphaenoides guntheri	12.83	-17.2853
Temperate	Northeast Atlantic	Demersal	Bathyal	Chordata	Actinopterygii	Coryphaenoides guntheri	13.6	-16.9584
Temperate	Northeast Atlantic	Demersal	Bathyal	Chordata	Actinopterygii	Coryphaenoides guntheri	14.76	-16.8532
Temperate	Northeast Atlantic	Demersal	Bathyal	Chordata	Actinopterygii	Coryphaenoides guntheri	13.26	-17.7224
Temperate	Northeast Atlantic	Demersal	Bathyal	Chordata	Actinopterygii	Coryphaenoides guntheri	13.91	-17.5593
Temperate	Northeast Atlantic	Demersal	Bathyal	Chordata	Actinopterygii	Coryphaenoides guntheri	13.01	-17.0959
Temperate	Northeast Atlantic	Demersal	Bathyal	Chordata	Actinopterygii	Coryphaenoides guntheri	14.52	-17.1854
Temperate	Northeast Atlantic	Demersal	Bathyal	Chordata	Actinopterygii	Coryphaenoides guntheri	15.96	-17.1624
Temperate	Northeast Atlantic	Demersal	Bathyal	Chordata	Actinopterygii	Coryphaenoides guntheri	11.8929	-17.3661
Temperate	Northeast Atlantic	Pelagic	Bathypelagic	Chordata	Actinopterigii	Coryphaenoides rupestris	10.3409	-18.5708
Temperate	Northeast Atlantic	Pelagic	Bathy-Abyssopelagic	Chordata	Actinopterygii	Coryphaenoides rupestris	14.4	-18.1
Temperate	Northeast Atlantic	Pelagic	Meso-Bathypelagic	Chordata	Actinopterygii	Coryphaenoides rupestris	7.71	-18.5068
Temperate	Northeast Atlantic	Pelagic	Meso-Bathypelagic	Chordata	Actinopterygii	Coryphaenoides rupestris	7.37	-18.7377
Temperate	Northeast Atlantic	Pelagic	Meso-Bathypelagic	Chordata	Actinopterygii	Coryphaenoides rupestris	7.14	-19.0096
Temperate	Northeast Atlantic	Pelagic	Meso-Bathypelagic	Chordata	Actinopterygii	Coryphaenoides rupestris	8.03	-19.3016
Temperate	Northeast Atlantic	Pelagic	Meso-Bathypelagic	Chordata	Actinopterygii	Coryphaenoides rupestris	8.17	-18.4751
Temperate	Northeast Atlantic	Pelagic	Meso-Bathypelagic	Chordata	Actinopterygii	Coryphaenoides rupestris	9.67	-19.125
Temperate	Northeast Atlantic	Pelagic	Meso-Bathypelagic	Chordata	Actinopterygii	Coryphaenoides rupestris	9.71	-18.6212
Temperate	Northeast Atlantic	Pelagic	Meso-Bathypelagic	Chordata	Actinopterygii	Coryphaenoides rupestris	10.36	-19.2179
Temperate	Northeast Atlantic	Pelagic	Meso-Bathypelagic	Chordata	Actinopterygii	Coryphaenoides rupestris	10.9	-19.3955
Temperate	Northeast Atlantic	Pelagic	Meso-Bathypelagic	Chordata	Actinopterygii	Coryphaenoides rupestris	11.12	-19.3707
Temperate	Northeast Atlantic	Pelagic	Meso-Bathypelagic	Chordata	Actinopterygii	Coryphaenoides rupestris	11.1	-19.0383
Temperate	Northeast Atlantic	Pelagic	Meso-Bathypelagic	Chordata	Actinopterygii	Coryphaenoides rupestris	9.62	-19.1642
Temperate	Northeast Atlantic	Pelagic	Meso-Bathypelagic	Chordata	Actinopterygii	Coryphaenoides rupestris	10.65	-19.5828
Temperate	Northeast Atlantic	Pelagic	Meso-Bathypelagic	Chordata	Actinopterygii	Coryphaenoides rupestris	9.74	-19.5972
Temperate	Northeast Atlantic	Pelagic	Meso-Bathypelagic	Chordata	Actinopterygii	Coryphaenoides rupestris	11.09	-19.4543
Temperate	Northeast Atlantic	Pelagic	Meso-Bathypelagic	Chordata	Actinopterygii	Coryphaenoides rupestris	10.29	-19.0661
Temperate	Northeast Atlantic	Pelagic	Meso-Bathypelagic	Chordata	Actinopterygii	Coryphaenoides rupestris	11.14	-19.0465
Temperate	Northeast Atlantic	Pelagic	Meso-Bathypelagic	Chordata	Actinopterygii	Coryphaenoides rupestris	11.13	-19.3079
Temperate	Northeast Atlantic	Pelagic	Meso-Bathypelagic	Chordata	Actinopterygii	Coryphaenoides rupestris	10.5	-19.2986
Temperate	Northeast Atlantic	Pelagic	Meso-Bathypelagic	Chordata	Actinopterygii	Coryphaenoides rupestris	11.64	-19.2024
Temperate	Northeast Atlantic	Pelagic	Meso-Bathypelagic	Chordata	Actinopterygii	Coryphaenoides rupestris	11.11	-19.6348
Temperate	Northeast Atlantic	Pelagic	Meso-Bathypelagic	Chordata	Actinopterygii	Coryphaenoides rupestris	10.76	-19.5368
Temperate	Northeast Atlantic	Pelagic	Meso-Bathypelagic	Chordata	Actinopterygii	Coryphaenoides rupestris	10.96	-18.8559
Temperate	Northeast Atlantic	Pelagic	Meso-Bathypelagic	Chordata	Actinopterygii	Coryphaenoides rupestris	11.72	-18.6211
Temperate	Northeast Atlantic	Pelagic	Meso-Bathypelagic	Chordata	Actinopterygii	Coryphaenoides rupestris	10.06	-18.7063
Temperate	Northeast Atlantic	Pelagic	Meso-Bathypelagic	Chordata	Actinopterygii	Coryphaenoides rupestris	11.8	-18.7235
Temperate	Northeast Atlantic	Pelagic	Meso-Bathypelagic	Chordata	Actinopterygii	Coryphaenoides rupestris	9.91	-19.1553
Temperate	Northeast Atlantic	Pelagic	Meso-Bathypelagic	Chordata	Actinopterygii	Coryphaenoides rupestris	10.41	-18.8306
Temperate	Northeast Atlantic	Pelagic	Meso-Bathypelagic	Chordata	Actinopterygii	Coryphaenoides rupestris	10.39	-18.7928
Temperate	Northeast Atlantic	Pelagic	Meso-Bathypelagic	Chordata	Actinopterygii	Coryphaenoides rupestris	11.42	-17.6883
Temperate	Northeast Atlantic	Pelagic	Meso-Bathypelagic	Chordata	Actinopterygii	Coryphaenoides rupestris	8.73	-18.5685
Temperate	Northeast Atlantic	Pelagic	Meso-Bathypelagic	Chordata	Actinopterygii	Coryphaenoides rupestris	8.21	-18.4078
Temperate	Northeast Atlantic	Pelagic	Meso-Bathypelagic	Chordata	Actinopterygii	Coryphaenoides rupestris	9.53	-18.325
Temperate	Northeast Atlantic	Pelagic	Meso-Bathypelagic	Chordata	Actinopterygii	Coryphaenoides rupestris	9.46	-19.1764
Temperate	Northeast Atlantic	Pelagic	Meso-Bathypelagic	Chordata	Actinopterygii	Coryphaenoides rupestris	8.75	-19.0657
Temperate	Northeast Atlantic	Pelagic	Meso-Bathypelagic	Chordata	Actinopterygii	Coryphaenoides rupestris	9.02	-19.0028
Temperate	Northeast Atlantic	Pelagic	Meso-Bathypelagic	Chordata	Actinopterygii	Coryphaenoides rupestris	9.67	-18.2288
Temperate	Northeast Atlantic	Pelagic	Meso-Bathypelagic	Chordata	Actinopterygii	Coryphaenoides rupestris	9.69	-18.0804
Temperate	Northeast Atlantic	Pelagic	Meso-Bathypelagic	Chordata	Actinopterygii	Coryphaenoides rupestris	9.13	-19.3096
Temperate	Northeast Atlantic	Pelagic	Meso-Bathypelagic	Chordata	Actinopterygii	Coryphaenoides rupestris	9.41	-18.3278
Temperate	Northeast Atlantic	Pelagic	Meso-Bathypelagic	Chordata	Actinopterygii	Coryphaenoides rupestris	9.75	-19.1098
Temperate	Northeast Atlantic	Pelagic	Meso-Bathypelagic	Chordata	Actinopterygii	Coryphaenoides rupestris	10.73	-19.8464
Temperate	Northeast Atlantic	Pelagic	Meso-Bathypelagic	Chordata	Actinopterygii	Coryphaenoides rupestris	9.82	-18.0257
Temperate	Northeast Atlantic	Pelagic	Meso-Bathypelagic	Chordata	Actinopterygii	Coryphaenoides rupestris	11.53	-19.6021
Temperate	Northeast Atlantic	Pelagic	Meso-Bathypelagic	Chordata	Actinopterygii	Coryphaenoides rupestris	10.05	-19.2957
Temperate	Northeast Atlantic	Pelagic	Meso-Bathypelagic	Chordata	Actinopterygii	Coryphaenoides rupestris	11.22	-18.9538
Temperate	Northeast Atlantic	Pelagic	Meso-Bathypelagic	Chordata	Actinopterygii	Coryphaenoides rupestris	11.09	-18.6818
Temperate	Northeast Atlantic	Pelagic	Meso-Bathypelagic	Chordata	Actinopterygii	Coryphaenoides rupestris	10.49	-18.7353
Temperate	Northeast Atlantic	Pelagic	Meso-Bathypelagic	Chordata	Actinopterygii	Coryphaenoides rupestris	9.9	-19.2246
Temperate	Northeast Atlantic	Pelagic	Meso-Bathypelagic	Chordata	Actinopterygii	Coryphaenoides rupestris	9.91	-18.4261
Temperate	Northeast Atlantic	Pelagic	Meso-Bathypelagic	Chordata	Actinopterygii	Coryphaenoides rupestris	10.09	-19.2547
Temperate	Northeast Atlantic	Pelagic	Meso-Bathypelagic	Chordata	Actinopterygii	Coryphaenoides rupestris	9.79	-19.3878
Temperate	Northeast Atlantic	Pelagic	Meso-Bathypelagic	Chordata	Actinopterygii	Coryphaenoides rupestris	9.28	-19.1853
Temperate	Northeast Atlantic	Pelagic	Meso-Bathypelagic	Chordata	Actinopterygii	Coryphaenoides rupestris	10.64	-19.5232
Temperate	Northeast Atlantic	Pelagic	Meso-Bathypelagic	Chordata	Actinopterygii	Coryphaenoides rupestris	10.2	-19.4464
Temperate	Northeast Atlantic	Pelagic	Meso-Bathypelagic	Chordata	Actinopterygii	Coryphaenoides rupestris	10.37	-19.4395
Temperate	Northeast Atlantic	Pelagic	Meso-Bathypelagic	Chordata	Actinopterygii	Coryphaenoides rupestris	10.22	-19.5127
Temperate	Northeast Atlantic	Pelagic	Meso-Bathypelagic	Chordata	Actinopterygii	Coryphaenoides rupestris	9.81	-19.267
Temperate	Northeast Atlantic	Pelagic	Meso-Bathypelagic	Chordata	Actinopterygii	Coryphaenoides rupestris	9.65	-19.621
Temperate	Northeast Atlantic	Pelagic	Meso-Bathypelagic	Chordata	Actinopterygii	Coryphaenoides rupestris	11.19	-18.3057
Temperate	Northeast Atlantic	Pelagic	Meso-Bathypelagic	Chordata	Actinopterygii	Coryphaenoides rupestris	10.17	-18.2271
Temperate	Northeast Atlantic	Pelagic	Meso-Bathypelagic	Chordata	Actinopterygii	Coryphaenoides rupestris	10.32	-19.1886
Temperate	Northeast Atlantic	Pelagic	Meso-Bathypelagic	Chordata	Actinopterygii	Coryphaenoides rupestris	10.54	-18.8565
Temperate	Northeast Atlantic	Pelagic	Meso-Bathypelagic	Chordata	Actinopterygii	Coryphaenoides rupestris	11.27	-18.8546
Temperate	Northeast Atlantic	Pelagic	Meso-Bathypelagic	Chordata	Actinopterygii	Coryphaenoides rupestris	11.16	-19.4395
Temperate	Northeast Atlantic	Pelagic	Meso-Bathypelagic	Chordata	Actinopterygii	Coryphaenoides rupestris	11.59	-18.4486
Temperate	Northeast Atlantic	Pelagic	Meso-Bathypelagic	Chordata	Actinopterygii	Coryphaenoides rupestris	10.46	-19.0459
Temperate	Northeast Atlantic	Pelagic	Meso-Bathypelagic	Chordata	Actinopterygii	Coryphaenoides rupestris	11.55	-18.8537
Temperate	Northeast Atlantic	Pelagic	Meso-Bathypelagic	Chordata	Actinopterygii	Coryphaenoides rupestris	10.26	-19.3001
Temperate	Northeast Atlantic	Pelagic	Meso-Bathypelagic	Chordata	Actinopterygii	Coryphaenoides rupestris	9.67249	-18.7552
Temperate	Northeast Atlantic	Pelagic	Meso-Bathypelagic	Chordata	Actinopterygii	Coryphaenoides rupestris	10.5092	-18.8865
Temperate	Northeast Atlantic	Pelagic	Meso-Bathypelagic	Chordata	Actinopterygii	Coryphaenoides rupestris	10.8194	-18.6316
Temperate	Northeast Atlantic	Pelagic	Meso-Bathypelagic	Chordata	Actinopterygii	Coryphaenoides rupestris	9.80704	-19.3082
Temperate	Northeast Atlantic	Pelagic	Meso-Bathypelagic	Chordata	Actinopterygii	Coryphaenoides rupestris	10.6783	-18.269
Temperate	Northeast Atlantic	Pelagic	Meso-Bathypelagic	Chordata	Actinopterygii	Coryphaenoides rupestris	11.3529	-18.1276
Temperate	Northeast Atlantic	Pelagic	Meso-Bathypelagic	Chordata	Actinopterygii	Coryphaenoides rupestris	11.403	-18.3635
Temperate	Northeast Atlantic	Pelagic	Meso-Bathypelagic	Chordata	Actinopterygii	Coryphaenoides mediterraneus	12.9	-17.5574
Temperate	Northeast Atlantic	Pelagic	Meso-Bathypelagic	Chordata	Actinopterygii	Coryphaenoides mediterraneus	12.71	-17.7858
Temperate	Northeast Atlantic	Pelagic	Meso-Bathypelagic	Chordata	Actinopterygii	Coryphaenoides mediterraneus	12.89	-17.3427
Temperate	Northeast Atlantic	Pelagic	Meso-Bathypelagic	Chordata	Actinopterygii	Coryphaenoides mediterraneus	12.7	-17.5921
Temperate	Northeast Atlantic	Pelagic	Meso-Bathypelagic	Chordata	Actinopterygii	Coryphaenoides mediterraneus	13.07	-17.408
Temperate	Northeast Atlantic	Pelagic	Meso-Bathypelagic	Chordata	Actinopterygii	Coryphaenoides mediterraneus	12.03	-17.578
Temperate	Northeast Atlantic	Pelagic	Meso-Bathypelagic	Chordata	Actinopterygii	Coryphaenoides mediterraneus	12.35	-17.2467
Temperate	Northeast Atlantic	Pelagic	Meso-Bathypelagic	Chordata	Actinopterygii	Coryphaenoides mediterraneus	13.22	-17.0506
Temperate	Northeast Atlantic	Pelagic	Meso-Bathypelagic	Chordata	Actinopterygii	Coryphaenoides mediterraneus	12.33	-17.161
Temperate	Northeast Atlantic	Pelagic	Meso-Bathypelagic	Chordata	Actinopterygii	Coryphaenoides mediterraneus	12.93	-16.6793
Temperate	Northeast Atlantic	Pelagic	Meso-Bathypelagic	Chordata	Actinopterygii	Coryphaenoides mediterraneus	12.9	-17.0168
Temperate	Northeast Atlantic	Pelagic	Meso-Bathypelagic	Chordata	Actinopterygii	Coryphaenoides mediterraneus	13.28	-17.1521
Temperate	Northeast Atlantic	Pelagic	Meso-Bathypelagic	Chordata	Actinopterygii	Coryphaenoides mediterraneus	13	-17.0834
Temperate	Northeast Atlantic	Pelagic	Meso-Bathypelagic	Chordata	Actinopterygii	Coryphaenoides mediterraneus	13.05	-16.7576
Temperate	Northeast Atlantic	Pelagic	Meso-Bathypelagic	Chordata	Actinopterygii	Coryphaenoides mediterraneus	12.32	-17.0862
Temperate	Northeast Atlantic	Pelagic	Meso-Bathypelagic	Chordata	Actinopterygii	Coryphaenoides mediterraneus	13.26	-16.9432
Temperate	Northeast Atlantic	Pelagic	Meso-Bathypelagic	Chordata	Actinopterygii	Coryphaenoides mediterraneus	12.5078	-18.0204
Temperate	Northeast Atlantic	Benthic	Abyssal	Echinodermata	Crinoidea	Crinoidea sp 1	14.18	-17.09
Temperate	Northeast Atlantic	Demersal	Abyssal	Chordata	Ascidiacea	Culeolus sp.	14.8	-17.71
Temperate	Northeast Atlantic	Benthic	Abyssal	Cnidaria	Anthozoa	Daontesia porcupina	13.29	-16.74
Temperate	Northeast Atlantic	Demersal	Bathyal	Chordata	Actinopterygii	Deania calcea	12.53	-17.0739
Temperate	Northeast Atlantic	Demersal	Bathyal	Chordata	Actinopterygii	Deania calcea	12.82	-17.1545
Temperate	Northeast Atlantic	Demersal	Bathyal	Chordata	Actinopterygii	Deania calcea	12.54	-17.3634
Temperate	Northeast Atlantic	Demersal	Bathyal	Chordata	Actinopterygii	Deania calcea	14.24	-16.7086
Temperate	Northeast Atlantic	Demersal	Bathyal	Chordata	Actinopterygii	Deania calcea	11.88	-17.3632
Temperate	Northeast Atlantic	Demersal	Bathyal	Chordata	Actinopterygii	Deania calcea	12.98	-17.0912
Temperate	Northeast Atlantic	Demersal	Bathyal	Chordata	Actinopterygii	Deania calcea	13.38	-17.2251
Temperate	Northeast Atlantic	Demersal	Bathyal	Chordata	Actinopterygii	Deania calcea	14.5334	-16.3376
Temperate	Northeast Atlantic	Demersal	Bathyal	Chordata	Actinopterygii	Deania calcea	13.2519	-17.3866
Temperate	Northeast Atlantic	Demersal	Bathyal	Chordata	Actinopterygii	Deania calcea	12.81	-17.9335
Temperate	Northeast Atlantic	Demersal	Bathyal	Chordata	Actinopterygii	Deania calcea	13.92	-17.1301
Temperate	Northeast Atlantic	Demersal	Bathyal	Chordata	Actinopterygii	Deania calcea	14.61	-15.4143
Temperate	Northeast Atlantic	Demersal	Bathyal	Chordata	Actinopterygii	Deania calcea	12.23	-17.468
Temperate	Northeast Atlantic	Demersal	Bathyal	Chordata	Actinopterygii	Deania calcea	13.6992	-16.5668
Temperate	Northeast Atlantic	Demersal	Bathyal	Chordata	Actinopterygii	Deania calcea	12.8302	-17.4394
Temperate	Northeast Atlantic	Demersal	Bathyal	Chordata	Actinopterygii	Deania calcea	12.6663	-17.2615
Temperate	Northeast Atlantic	Demersal	Bathyal	Chordata	Actinopterygii	Deania calcea	13.4065	-17.1816
Temperate	Northeast Atlantic	Demersal	Bathyal	Chordata	Actinopterygii	Deania calcea	12.4228	-17.2361
Temperate	Northeast Atlantic	Demersal	Bathyal	Chordata	Actinopterygii	Deania calcea	12.582	-17.1077
Temperate	Northeast Atlantic	Benthic	Abyssal	Echinodermata	Holothuroidea	Deima validum	13.44	-16.15
Temperate	Northeast Atlantic	Benthic	Bathyal	Cnidaria	Anthozoa	Desmophyllum pertusum	8.22914	-14.3108
Temperate	Northeast Atlantic	Benthic	Bathyal	Cnidaria	Anthozoa	Desmophyllum pertusum	6.08196	-20.4673
Temperate	Northeast Atlantic	Benthic	Bathyal	Cnidaria	Anthozoa	Desmophyllum pertusum	8.38983	-20.5045
Temperate	Northeast Atlantic	Demersal	Bathyal	Arthropoda	Malacostraca	Dichelopandalus bonnieri	9.6	-17.3
Temperate	Northeast Atlantic	Benthic	Abyssal	Echinodermata	Asteroidea	Dytaster grandis	17.13	-15.6
Temperate	Northeast Atlantic	Benthic	Abyssal	Annelida	Echiura	Echiura sp 1	12.84	-15.34
Temperate	Northeast Atlantic	Benthic	Abyssal	Annelida	Echiura	Echiura sp 2	12.8	-16.2
Temperate	Northeast Atlantic	Benthic	Abyssal	Annelida	Echiura	Echiura sp 3	13.61	-13.8
Temperate	Northeast Atlantic	Benthic	Abyssal	Echinodermata	Holothuroidea	Ellipinion molle	11.26	-20.35
Temperate	Northeast Atlantic	Demersal	Bathyal	Chordata	Actinopterigii	Epigonus telescopus	12.7371
Temperate	Northeast Atlantic	Demersal	Bathyal	Chordata	Actinopterygii	Etmopterus spinax	10.1	-17.5
Temperate	Northeast Atlantic	Benthic	Abyssal	Annelida	Polychaeta	Euclymeninae	13.03	-16.89
Temperate	Northeast Atlantic	Benthic	Bathyal	Annelida	Polychaeta	Eunice norvegica	11.0135	-17.6921
Temperate	Northeast Atlantic	Benthic	Bathyal	Annelida	Polychaeta	Eunice norvegica	10.5475	-17.8473
Temperate	Northeast Atlantic	Benthic	Bathyal	Annelida	Polychaeta	Eunice norvegica	10.3372	-17.9811
Temperate	Northeast Atlantic	Demersal	Abyssal	Arthropoda	Malacostraca	Eurythenes gryllus	14.2	-18.67
Temperate	Northeast Atlantic	Pelagic	Meso-Bathypelagic	Arthropoda	Malacostraca	Eusergestes arcticus	8.2	-19.4
Temperate	Northeast Atlantic	Benthic	Bathyal	Mollusca	Gastropoda	Euspira fusca	9.7	-17.4
Temperate	Northeast Atlantic	Benthic	Abyssal	Echinodermata	Asteroidea	Freyella sexradiata	14.32	-17.75
Temperate	Northeast Atlantic	Demersal	Bathyal	Chordata	Actinopterygii	Gadiculus argenteus	9.2	-18.6
Temperate	Northeast Atlantic	Demersal	Bathyal	Chordata	Actinopterigii	Gaidropsarus vulgaris	11.0264	-17.2851
Temperate	Northeast Atlantic	Demersal	Bathyal	Chordata	Actinopterigii	Gaidropsarus vulgaris	11.2844	-17.5264
Temperate	Northeast Atlantic	Demersal	Bathyal	Chordata	Actinopterigii	Gaidropsarus vulgaris	10.7945	-18.004
Temperate	Northeast Atlantic	Demersal	Bathyal	Chordata	Actinopterygii	Galeus melastomus	11	-17.1
Temperate	Northeast Atlantic	Benthic	Bathyal	Arthropoda	Malacostraca	Gennadas elegans	7.8	-19.6
Temperate	Northeast Atlantic	Demersal	Abyssal	Arthropoda	Malacostraca	Glyphocrangon sp.	15.52	-16.77
Temperate	Northeast Atlantic	Demersal	Bathyal	Chordata	Actinopterygii	Glyptocephalus cynoglossus	10.2328	-18.0106
Temperate	Northeast Atlantic	Demersal	Bathyal	Chordata	Actinopterygii	Glyptocephalus cynoglossus	11.9533	-17.5956
Temperate	Northeast Atlantic	Demersal	Bathyal	Chordata	Actinopterygii	Glyptocephalus cynoglossus	11.8738	-17.6074
Temperate	Northeast Atlantic	Demersal	Bathyal	Chordata	Actinopterygii	Glyptocephalus cynoglossus	12.213	-17.7972
Temperate	Northeast Atlantic	Demersal	Bathyal	Chordata	Actinopterygii	Glyptocephalus cynoglossus	11.0363	-17.4502
Temperate	Northeast Atlantic	Demersal	Bathyal	Chordata	Actinopterygii	Glyptocephalus cynoglossus	12.1244	-17.7741
Temperate	Northeast Atlantic	Demersal	Bathyal	Chordata	Actinopterygii	Glyptocephalus cynoglossus	12.3874	-17.3248
Temperate	Northeast Atlantic	Demersal	Bathyal	Chordata	Actinopterygii	Glyptocephalus cynoglossus	12.7284	-17.9533
Temperate	Northeast Atlantic	Demersal	Bathyal	Chordata	Actinopterygii	Glyptocephalus cynoglossus	9.85051	-17.8544
Temperate	Northeast Atlantic	Pelagic	Meso-Bathypelagic	Arthropoda	Malacostraca	Gnathophausia zoea	8.1	-18.8
Temperate	Northeast Atlantic	Benthic	Bathyal	Cnidaria	Anthozoa	gorgonian spp.	10.6231	-20.9007
Temperate	Northeast Atlantic	Benthic	Bathyal	Cnidaria	Anthozoa	gorgonian spp.	8.73631	-20.3398
Temperate	Northeast Atlantic	Benthic	Bathyal	Cnidaria	Anthozoa	gorgonian spp.	8.60776	-22.091
Temperate	Northeast Atlantic	Benthic	Bathyal	Echinodermata	Echinoidea	Gracilechinus acutus	7.6	-18.3
Temperate	Northeast Atlantic	Demersal	Bathyal	Chordata	Actinopterigii	Guttigadus latifrons	9.115	-18.2737
Temperate	Northeast Atlantic	Demersal	Bathyal	Chordata	Actinopterygii	Halosauropsis macrochir	14.1533	-17.3854
Temperate	Northeast Atlantic	Demersal	Bathyal	Chordata	Actinopterygii	Halosauropsis macrochir	13.2854	-17.5127
Temperate	Northeast Atlantic	Demersal	Bathyal	Chordata	Actinopterygii	Halosauropsis macrochir	12.937	-17.2489
Temperate	Northeast Atlantic	Demersal	Bathyal	Chordata	Actinopterygii	Halosauropsis macrochir	13.8182	-17.4013
Temperate	Northeast Atlantic	Demersal	Bathyal	Chordata	Actinopterygii	Halosauropsis macrochir	12.5266	-17.3674
Temperate	Northeast Atlantic	Demersal	Bathyal	Chordata	Actinopterygii	Halosauropsis macrochir	13.7812	-17.1072
Temperate	Northeast Atlantic	Demersal	Bathyal	Chordata	Actinopterygii	Halosauropsis macrochir	13.5321	-17.4245
Temperate	Northeast Atlantic	Demersal	Bathyal	Chordata	Actinopterygii	Halosauropsis macrochir	12.9508	-17.5241
Temperate	Northeast Atlantic	Demersal	Bathyal	Chordata	Actinopterygii	Halosauropsis macrochir	13.9335	-17.546
Temperate	Northeast Atlantic	Demersal	Bathyal	Chordata	Actinopterygii	Halosauropsis macrochir	14.1829	-17.2973
Temperate	Northeast Atlantic	Demersal	Bathyal	Chordata	Actinopterygii	Halosauropsis macrochir	12.6709	-17.4449
Temperate	Northeast Atlantic	Demersal	Bathyal	Chordata	Actinopterygii	Halosauropsis macrochir	12.801	-17.4459
Temperate	Northeast Atlantic	Demersal	Bathyal	Chordata	Actinopterygii	Halosauropsis macrochir	13.6037	-17.2316
Temperate	Northeast Atlantic	Demersal	Bathyal	Chordata	Actinopterygii	Helicolenus dactylopterus	9.8188	-17.6872
Temperate	Northeast Atlantic	Demersal	Bathyal	Chordata	Actinopterygii	Helicolenus dactylopterus	12.4913	-17.4694
Temperate	Northeast Atlantic	Demersal	Bathyal	Chordata	Actinopterygii	Helicolenus dactylopterus	11.1972	-17.5557
Temperate	Northeast Atlantic	Demersal	Bathyal	Chordata	Actinopterygii	Helicolenus dactylopterus	12.3228	-17.3585
Temperate	Northeast Atlantic	Demersal	Bathyal	Chordata	Actinopterygii	Helicolenus dactylopterus	11.792	-17.6082
Temperate	Northeast Atlantic	Demersal	Bathyal	Chordata	Actinopterygii	Helicolenus dactylopterus	12.614	-17.34
Temperate	Northeast Atlantic	Demersal	Bathyal	Chordata	Actinopterygii	Helicolenus dactylopterus	11.9768	-17.7422
Temperate	Northeast Atlantic	Demersal	Bathyal	Chordata	Actinopterygii	Helicolenus dactylopterus	11.8051	-17.3166
Temperate	Northeast Atlantic	Demersal	Bathyal	Chordata	Actinopterygii	Helicolenus dactylopterus	13.1467	-17.5022
Temperate	Northeast Atlantic	Demersal	Bathyal	Chordata	Actinopterygii	Helicolenus dactylopterus	11.9839	-17.1608
Temperate	Northeast Atlantic	Demersal	Bathyal	Chordata	Actinopterygii	Helicolenus dactylopterus	11	-18
Temperate	Northeast Atlantic	Benthic	Bathyal	Annelida	Polychaeta	Hesionidae sp.	7.94696	-18.5539
Temperate	Northeast Atlantic	Benthic	Bathyal	Annelida	Polychaeta	Hesionidae sp.	7.482	-19.9762
Temperate	Northeast Atlantic	Benthic	Bathyal	Annelida	Polychaeta	Hesionidae sp.	6.72719	-20.6276
Temperate	Northeast Atlantic	Benthic	Abyssal	Chordata	Ascidiacea	Hexacrobylidae	15.11	-16.79
Temperate	Northeast Atlantic	Benthic	Bathyal	Porifera	Hexactinellida	Hexactinellida sp.	12.7936	-19.9862
Temperate	Northeast Atlantic	Benthic	Abyssal	Porifera	Hexactinellida	Hexactinellidae	17.93	-17.25
Temperate	Northeast Atlantic	Benthic	Bathyal	Mollusca	Bivalvia	Hiatella arctica	9.94871	-16.4465
Temperate	Northeast Atlantic	Benthic	Bathyal	Mollusca	Bivalvia	Hiatella arctica	10.458	-16.3832
Temperate	Northeast Atlantic	Demersal	Abyssal	Chordata	Actinopterygii	Histiobranchus bathybius	14.4	-17.19
Temperate	Northeast Atlantic	Benthic	Abyssal	Echinodermata	Holothuroidea	Holothuroidea sp 1	11.67	-17.13
Temperate	Northeast Atlantic	Demersal	Bathyal	Chordata	Actinopterygii	Hoplostethus atlanticus	10.5071	-18.0894
Temperate	Northeast Atlantic	Demersal	Bathyal	Chordata	Actinopterygii	Hoplostethus atlanticus	11.2006	-18.0551
Temperate	Northeast Atlantic	Demersal	Bathyal	Chordata	Actinopterygii	Hoplostethus atlanticus	11.746	-18.1634
Temperate	Northeast Atlantic	Demersal	Bathyal	Chordata	Actinopterygii	Hoplostethus atlanticus	10.4661	-17.9781
Temperate	Northeast Atlantic	Demersal	Bathyal	Chordata	Actinopterygii	Hoplostethus atlanticus	10.7632	-18.3728
Temperate	Northeast Atlantic	Demersal	Bathyal	Chordata	Actinopterygii	Hoplostethus atlanticus	13.7805	-17.2474
Temperate	Northeast Atlantic	Demersal	Bathyal	Chordata	Actinopterygii	Hoplostethus atlanticus	10.9333	-17.8521
Temperate	Northeast Atlantic	Demersal	Bathyal	Chordata	Actinopterygii	Hoplostethus atlanticus	11.4004	-17.9091
Temperate	Northeast Atlantic	Demersal	Bathyal	Chordata	Actinopterygii	Hoplostethus atlanticus	11.4699	-18.3636
Temperate	Northeast Atlantic	Demersal	Bathyal	Chordata	Actinopterygii	Hoplostethus atlanticus	10.5676	-18.1643
Temperate	Northeast Atlantic	Demersal	Bathyal	Chordata	Actinopterygii	Hoplostethus atlanticus	11.6281	-18.069
Temperate	Northeast Atlantic	Demersal	Bathyal	Chordata	Actinopterygii	Hoplostethus atlanticus	11.6775	-18.0357
Temperate	Northeast Atlantic	Demersal	Bathyal	Chordata	Actinopterygii	Hoplostethus atlanticus	11.3756	-18.0463
Temperate	Northeast Atlantic	Demersal	Bathyal	Chordata	Actinopterygii	Hoplostethus atlanticus	11.1416	-18.329
Temperate	Northeast Atlantic	Demersal	Bathyal	Chordata	Actinopterygii	Hoplostethus atlanticus	10.5981	-18.0032
Temperate	Northeast Atlantic	Demersal	Bathyal	Chordata	Actinopterygii	Hoplostethus atlanticus	10.0812	-18.2766
Temperate	Northeast Atlantic	Demersal	Bathyal	Chordata	Actinopterygii	Hoplostethus atlanticus	11.3809	-18.1573
Temperate	Northeast Atlantic	Demersal	Bathyal	Chordata	Actinopterygii	Hoplostethus atlanticus	11.1454	-18.1557
Temperate	Northeast Atlantic	Demersal	Bathyal	Chordata	Actinopterygii	Hoplostethus atlanticus	11.212	-17.552
Temperate	Northeast Atlantic	Demersal	Bathyal	Chordata	Actinopterygii	Hoplostethus atlanticus	11.5843	-18.073
Temperate	Northeast Atlantic	Demersal	Bathyal	Chordata	Actinopterygii	Hoplostethus atlanticus	11.8295	-18.0388
Temperate	Northeast Atlantic	Demersal	Bathyal	Chordata	Actinopterygii	Hoplostethus atlanticus	11.6477	-17.8076
Temperate	Northeast Atlantic	Demersal	Bathyal	Chordata	Actinopterygii	Hoplostethus atlanticus	11.3446	-17.6685
Temperate	Northeast Atlantic	Demersal	Bathyal	Chordata	Actinopterygii	Hoplostethus atlanticus	11.3657	-18.3011
Temperate	Northeast Atlantic	Demersal	Bathyal	Chordata	Actinopterygii	Hoplostethus atlanticus	11.492	-17.988
Temperate	Northeast Atlantic	Demersal	Bathyal	Chordata	Actinopterygii	Hoplostethus atlanticus	10.8582	-18.2535
Temperate	Northeast Atlantic	Demersal	Bathyal	Chordata	Actinopterygii	Hoplostethus atlanticus	11.7548	-17.9174
Temperate	Northeast Atlantic	Demersal	Bathyal	Chordata	Actinopterygii	Hoplostethus atlanticus	11.4141	-17.892
Temperate	Northeast Atlantic	Demersal	Bathyal	Chordata	Actinopterygii	Hoplostethus atlanticus	10.6705	-18.2905
Temperate	Northeast Atlantic	Demersal	Bathyal	Chordata	Actinopterygii	Hoplostethus atlanticus	13.04	-17.5533
Temperate	Northeast Atlantic	Demersal	Bathyal	Chordata	Actinopterygii	Hoplostethus atlanticus	12.73	-17.4254
Temperate	Northeast Atlantic	Demersal	Bathyal	Chordata	Actinopterygii	Hoplostethus atlanticus	13.23	-17.4166
Temperate	Northeast Atlantic	Demersal	Bathyal	Chordata	Actinopterygii	Hoplostethus atlanticus	13.15	-17.4966
Temperate	Northeast Atlantic	Demersal	Bathyal	Chordata	Actinopterygii	Hoplostethus atlanticus	12.42	-17.5005
Temperate	Northeast Atlantic	Demersal	Bathyal	Chordata	Actinopterygii	Hoplostethus atlanticus	13.49	-17.4554
Temperate	Northeast Atlantic	Demersal	Bathyal	Chordata	Actinopterygii	Hoplostethus atlanticus	13.47	-17.4424
Temperate	Northeast Atlantic	Demersal	Bathyal	Chordata	Actinopterygii	Hoplostethus atlanticus	13.8	-17.2447
Temperate	Northeast Atlantic	Demersal	Bathyal	Chordata	Actinopterygii	Hoplostethus atlanticus	12.97	-17.6258
Temperate	Northeast Atlantic	Demersal	Bathyal	Chordata	Actinopterygii	Hoplostethus atlanticus	13.8	-17.2518
Temperate	Northeast Atlantic	Demersal	Bathyal	Chordata	Actinopterygii	Hoplostethus atlanticus	12.01	-17.2085
Temperate	Northeast Atlantic	Demersal	Bathyal	Chordata	Actinopterygii	Hoplostethus atlanticus	13.21	-17.4066
Temperate	Northeast Atlantic	Demersal	Bathyal	Chordata	Actinopterygii	Hoplostethus atlanticus	13.01	-17.2539
Temperate	Northeast Atlantic	Demersal	Bathyal	Chordata	Actinopterygii	Hoplostethus atlanticus	12.83	-17.3594
Temperate	Northeast Atlantic	Demersal	Bathyal	Chordata	Actinopterygii	Hoplostethus atlanticus	12.76	-17.2807
Temperate	Northeast Atlantic	Demersal	Bathyal	Chordata	Actinopterygii	Hoplostethus atlanticus	12.27	-17.3535
Temperate	Northeast Atlantic	Demersal	Bathyal	Chordata	Actinopterygii	Hoplostethus atlanticus	13.09	-17.5281
Temperate	Northeast Atlantic	Demersal	Bathyal	Chordata	Actinopterygii	Hoplostethus atlanticus	14.03	-17.4458
Temperate	Northeast Atlantic	Demersal	Bathyal	Chordata	Actinopterygii	Hoplostethus atlanticus	14.88	-17.1619
Temperate	Northeast Atlantic	Demersal	Bathyal	Chordata	Actinopterygii	Hoplostethus atlanticus	14.9	-17.1193
Temperate	Northeast Atlantic	Demersal	Bathyal	Chordata	Actinopterygii	Hoplostethus atlanticus	14.49	-17.3524
Temperate	Northeast Atlantic	Demersal	Bathyal	Chordata	Actinopterygii	Hoplostethus atlanticus	14.21	-17.0565
Temperate	Northeast Atlantic	Demersal	Bathyal	Chordata	Actinopterygii	Hoplostethus atlanticus	14.75	-17.0122
Temperate	Northeast Atlantic	Demersal	Bathyal	Chordata	Actinopterygii	Hoplostethus atlanticus	14.63	-17.4143
Temperate	Northeast Atlantic	Demersal	Bathyal	Chordata	Actinopterygii	Hoplostethus atlanticus	14.91	-17.008
Temperate	Northeast Atlantic	Demersal	Bathyal	Chordata	Actinopterygii	Hoplostethus atlanticus	14.65	-16.9574
Temperate	Northeast Atlantic	Demersal	Bathyal	Chordata	Actinopterygii	Hoplostethus atlanticus	14.38	-17.1542
Temperate	Northeast Atlantic	Demersal	Bathyal	Chordata	Actinopterygii	Hoplostethus atlanticus	15.26	-17.0916
Temperate	Northeast Atlantic	Demersal	Bathyal	Chordata	Actinopterygii	Hoplostethus atlanticus	14.91	-16.9285
Temperate	Northeast Atlantic	Demersal	Bathyal	Chordata	Actinopterygii	Hoplostethus atlanticus	14.7	-17.2692
Temperate	Northeast Atlantic	Demersal	Bathyal	Chordata	Actinopterygii	Hoplostethus atlanticus	14.16	-17.1149
Temperate	Northeast Atlantic	Demersal	Bathyal	Chordata	Actinopterygii	Hoplostethus atlanticus	14.45	-17.2334
Temperate	Northeast Atlantic	Demersal	Bathyal	Chordata	Actinopterygii	Hydrolagus mirabilis	10.9853	-16.7935
Temperate	Northeast Atlantic	Demersal	Bathyal	Chordata	Actinopterygii	Hydrolagus mirabilis	11.94	-16.9498
Temperate	Northeast Atlantic	Demersal	Bathyal	Chordata	Actinopterygii	Hydrolagus mirabilis	12.89	-16.5232
Temperate	Northeast Atlantic	Demersal	Bathyal	Chordata	Actinopterygii	Hydrolagus mirabilis	12.64	-16.722
Temperate	Northeast Atlantic	Demersal	Bathyal	Chordata	Actinopterygii	Hydrolagus mirabilis	12.68	-16.55
Temperate	Northeast Atlantic	Demersal	Bathyal	Chordata	Actinopterygii	Hydrolagus mirabilis	13.4704	-16.3012
Temperate	Northeast Atlantic	Demersal	Bathyal	Chordata	Actinopterygii	Hydrolagus mirabilis	13.2691	-16.308
Temperate	Northeast Atlantic	Demersal	Bathyal	Chordata	Actinopterygii	Hydrolagus mirabilis	14.0867	-16.3917
Temperate	Northeast Atlantic	Demersal	Bathyal	Chordata	Actinopterygii	Hydrolagus mirabilis	12.43	-16.2946
Temperate	Northeast Atlantic	Demersal	Bathyal	Chordata	Actinopterygii	Hydrolagus mirabilis	13.33	-16.2641
Temperate	Northeast Atlantic	Demersal	Bathyal	Chordata	Actinopterygii	Hydrolagus mirabilis	12.6809	-16.3629
Temperate	Northeast Atlantic	Demersal	Bathyal	Chordata	Actinopterygii	Hydrolagus mirabilis	13.7542	-16.5054
Temperate	Northeast Atlantic	Demersal	Bathyal	Chordata	Actinopterygii	Hydrolagus mirabilis	13.97	-16.2375
Temperate	Northeast Atlantic	Demersal	Bathyal	Chordata	Actinopterygii	Hydrolagus mirabilis	13.0893	-16.6234
Temperate	Northeast Atlantic	Demersal	Bathyal	Chordata	Actinopterygii	Hydrolagus mirabilis	13.7259	-16.3507
Temperate	Northeast Atlantic	Demersal	Bathyal	Chordata	Actinopterygii	Hydrolagus mirabilis	13.38	-16.7522
Temperate	Northeast Atlantic	Demersal	Bathyal	Chordata	Actinopterygii	Hydrolagus mirabilis	13.642	-16.4589
Temperate	Northeast Atlantic	Demersal	Bathyal	Chordata	Actinopterygii	Hydrolagus mirabilis	13.23	-16.7253
Temperate	Northeast Atlantic	Demersal	Bathyal	Chordata	Actinopterygii	Hydrolagus mirabilis	12.86	-16.6371
Temperate	Northeast Atlantic	Benthic	Bathyal	Cnidaria	Hydrozoa	Hydrozoa spp.	9.40217	-21.0841
Temperate	Northeast Atlantic	Benthic	Bathyal	Cnidaria	Hydrozoa	Hydrozoa spp.	17.6124	-17.5283
Temperate	Northeast Atlantic	Benthic	Bathyal	Cnidaria	Hydrozoa	Hydrozoa spp.	9.34794	-21.1468
Temperate	Northeast Atlantic	Pelagic	Mesopelagic	Mollusca	Cephalopoda	Illex coindetii	10.9	-19.5
Temperate	Northeast Atlantic	Benthic	Abyssal	Cnidaria	Anthozoa	Iosactis vagabunda	14.92	-15.6
Temperate	Northeast Atlantic	Demersal	Abyssal	Arthropoda	Malacostraca	Isopoda	14.35	-17.72
Temperate	Northeast Atlantic	Benthic	Abyssal	Cnidaria	Anthozoa	Kadosactis commensalis	13.93	-15.47
Temperate	Northeast Atlantic	Benthic	Abyssal	Annelida	Polychaeta	Laetmonice sp.	14.72	-16.43
Temperate	Northeast Atlantic	Benthic	Bathyal	Cnidaria	Anthozoa	Leiopathes sp.	7.39656	-21.7587
Temperate	Northeast Atlantic	Benthic	Bathyal	Cnidaria	Anthozoa	Leiopathes sp.	7.45381	-21.3901
Temperate	Northeast Atlantic	Benthic	Bathyal	Cnidaria	Anthozoa	Leiopathes sp.	7.68279	-21.1821
Temperate	Northeast Atlantic	Demersal	Bathyal	Chordata	Actinopterigii	Lepidion eques	6.79637	-18.7756
Temperate	Northeast Atlantic	Demersal	Bathyal-Abyssal	Chordata	Actinopterygii	Lepidion eques	13.8	-17.4
Temperate	Northeast Atlantic	Demersal	Bathyal	Chordata	Actinopterygii	Lepidion eques	9.24508	-19.1701
Temperate	Northeast Atlantic	Demersal	Bathyal	Chordata	Actinopterygii	Lepidion eques	10.1087	-18.7921
Temperate	Northeast Atlantic	Demersal	Bathyal	Chordata	Actinopterygii	Lepidion eques	11.96	-17.4265
Temperate	Northeast Atlantic	Demersal	Bathyal	Chordata	Actinopterygii	Lepidion eques	8.25386	-18.7536
Temperate	Northeast Atlantic	Demersal	Bathyal	Chordata	Actinopterygii	Lepidion eques	9.67291	-18.399
Temperate	Northeast Atlantic	Demersal	Bathyal	Chordata	Actinopterygii	Lepidion eques	9.81153	-18.894
Temperate	Northeast Atlantic	Demersal	Bathyal	Chordata	Actinopterygii	Lepidion eques	10.7905	-18.6443
Temperate	Northeast Atlantic	Demersal	Bathyal	Chordata	Actinopterygii	Lepidion eques	11.4223	-18.336
Temperate	Northeast Atlantic	Demersal	Bathyal	Chordata	Actinopterygii	Lepidion eques	9.93216	-18.5058
Temperate	Northeast Atlantic	Demersal	Bathyal	Chordata	Actinopterygii	Lepidion eques	11.5715	-17.8605
Temperate	Northeast Atlantic	Demersal	Bathyal	Chordata	Actinopterygii	Lepidion eques	10.3866	-17.7499
Temperate	Northeast Atlantic	Demersal	Bathyal	Chordata	Actinopterygii	Lepidion eques	11.5507	-17.7087
Temperate	Northeast Atlantic	Demersal	Bathyal	Chordata	Actinopterygii	Lepidion eques	10.4017	-17.8279
Temperate	Northeast Atlantic	Demersal	Bathyal	Chordata	Actinopterygii	Lepidion eques	11.1768	-17.9621
Temperate	Northeast Atlantic	Demersal	Bathyal	Chordata	Actinopterygii	Lepidion eques	12.0754	-17.3591
Temperate	Northeast Atlantic	Demersal	Bathyal	Chordata	Actinopterygii	Lepidion eques	11.5464	-17.592
Temperate	Northeast Atlantic	Demersal	Bathyal	Chordata	Actinopterygii	Lepidion eques	10.4451	-17.6755
Temperate	Northeast Atlantic	Demersal	Bathyal	Chordata	Actinopterygii	Lepidion eques	10.6969	-17.7046
Temperate	Northeast Atlantic	Demersal	Bathyal	Chordata	Actinopterygii	Lepidion eques	11.9687	-17.7496
Temperate	Northeast Atlantic	Demersal	Bathyal	Chordata	Actinopterygii	Lepidion eques	11.5015	-17.7027
Temperate	Northeast Atlantic	Demersal	Bathyal	Chordata	Actinopterygii	Lepidion eques	11.5125	-17.8007
Temperate	Northeast Atlantic	Demersal	Bathyal	Chordata	Actinopterygii	Lepidion eques	11.6292	-17.6286
Temperate	Northeast Atlantic	Demersal	Bathyal	Chordata	Actinopterygii	Lepidion eques	12.2062	-16.9458
Temperate	Northeast Atlantic	Demersal	Bathyal	Chordata	Actinopterygii	Lepidion eques	11.9515	-17.8184
Temperate	Northeast Atlantic	Demersal	Bathyal	Chordata	Actinopterygii	Lepidorhombus whiffiagonis	8.9	-17.7
Temperate	Northeast Atlantic	Demersal	Bathyal	Chordata	Actinopterygii	Lophius piscatorius	12.7	-18.3
Temperate	Northeast Atlantic	Demersal	Bathyal	Chordata	Actinopterygii	Lophius piscatorius	14.7	-17.1
Temperate	Northeast Atlantic	Benthic	Bathyal	Cnidaria	Anthozoa	Madrepora oculata	7.48394	-22.2132
Temperate	Northeast Atlantic	Benthic	Bathyal	Cnidaria	Anthozoa	Madrepora oculata	6.90479	-17.5157
Temperate	Northeast Atlantic	Benthic	Bathyal	Cnidaria	Anthozoa	Madrepora oculata	8.49528	-18.1413
Temperate	Northeast Atlantic	Demersal	Bathyal	Chordata	Actinopterygii	Malacocephalus laevis	10.5	-18.2
Temperate	Northeast Atlantic	Pelagic	Meso-Bathypelagic	Arthropoda	Malacostraca	Meganyctiphanes norvegica	8.1	-20.8
Temperate	Northeast Atlantic	Demersal	Bathyal	Chordata	Actinopterygii	Merluccius merluccius	11.6	-18.8
Temperate	Northeast Atlantic	Demersal	Bathyal	Chordata	Actinopterygii	Merluccius merluccius	14.3718	-17.5698
Temperate	Northeast Atlantic	Demersal	Bathyal	Chordata	Actinopterygii	Merluccius merluccius	13.1485	-17.6324
Temperate	Northeast Atlantic	Demersal	Bathyal	Chordata	Actinopterygii	Merluccius merluccius	13.0027	-18.8478
Temperate	Northeast Atlantic	Demersal	Bathyal	Chordata	Actinopterygii	Merluccius merluccius	13.1108	-18.2036
Temperate	Northeast Atlantic	Demersal	Bathyal	Chordata	Actinopterygii	Merluccius merluccius	12.7837	-18.8382
Temperate	Northeast Atlantic	Benthic	Abyssal	Echinodermata	Holothuroidea	Mesothuria candelabri	15.74	-15.04
Temperate	Northeast Atlantic	Demersal	Bathyal	Chordata	Actinopterygii	Microchirus variegatus	9.4	-17.6
Temperate	Northeast Atlantic	Demersal	Bathyal	Chordata	Actinopterygii	Microchirus variegatus	9.6	-17.3
Temperate	Northeast Atlantic	Pelagic	Meso-Bathypelagic	Chordata	Actinopterygii	Micromesistius poutassou	9.1	-18.9
Temperate	Northeast Atlantic	Pelagic	Meso-Bathypelagic	Chordata	Actinopterygii	Micromesistius poutassou	7.89792	-18.93
Temperate	Northeast Atlantic	Pelagic	Meso-Bathypelagic	Chordata	Actinopterygii	Micromesistius poutassou	7.95272	-18.5527
Temperate	Northeast Atlantic	Pelagic	Meso-Bathypelagic	Chordata	Actinopterygii	Micromesistius poutassou	10.0422	-18.3638
Temperate	Northeast Atlantic	Pelagic	Meso-Bathypelagic	Chordata	Actinopterygii	Micromesistius poutassou	10.3782	-18.9303
Temperate	Northeast Atlantic	Pelagic	Meso-Bathypelagic	Chordata	Actinopterygii	Micromesistius poutassou	9.29787	-18.4323
Temperate	Northeast Atlantic	Pelagic	Meso-Bathypelagic	Chordata	Actinopterygii	Micromesistius poutassou	10.1568	-18.9783
Temperate	Northeast Atlantic	Pelagic	Meso-Bathypelagic	Chordata	Actinopterygii	Micromesistius poutassou	10.1839	-18.2987
Temperate	Northeast Atlantic	Pelagic	Meso-Bathypelagic	Chordata	Actinopterygii	Micromesistius poutassou	10.7435	-19.2683
Temperate	Northeast Atlantic	Pelagic	Meso-Bathypelagic	Chordata	Actinopterygii	Micromesistius poutassou	11.2783	-19.0901
Temperate	Northeast Atlantic	Pelagic	Meso-Bathypelagic	Chordata	Actinopterygii	Micromesistius poutassou	11.0819	-19.0202
Temperate	Northeast Atlantic	Pelagic	Meso-Bathypelagic	Chordata	Actinopterygii	Micromesistius poutassou	10.7577	-18.3727
Temperate	Northeast Atlantic	Pelagic	Meso-Bathypelagic	Chordata	Actinopterygii	Micromesistius poutassou	9.67351	-18.4507
Temperate	Northeast Atlantic	Pelagic	Meso-Bathypelagic	Chordata	Actinopterygii	Micromesistius poutassou	11.0282	-18.1392
Temperate	Northeast Atlantic	Pelagic	Meso-Bathypelagic	Chordata	Actinopterygii	Micromesistius poutassou	10.6543	-19.3412
Temperate	Northeast Atlantic	Pelagic	Meso-Bathypelagic	Chordata	Actinopterygii	Micromesistius poutassou	11.4153	-18.1515
Temperate	Northeast Atlantic	Benthic	Abyssal	Echinodermata	Holothuroidea	Molpadia blakei	15.87	-16.3
Temperate	Northeast Atlantic	Demersal	Bathyal	Chordata	Actinopterygii	Molva dypterygia	11.5805	-18.0099
Temperate	Northeast Atlantic	Demersal	Bathyal	Chordata	Actinopterygii	Molva dypterygia	11.7437	-17.9138
Temperate	Northeast Atlantic	Demersal	Bathyal	Chordata	Actinopterygii	Molva macrophthalma	11.2	-17.8
Temperate	Northeast Atlantic	Demersal	Bathyal	Chordata	Actinopterygii	Molva molva	12.8	-17.9
Temperate	Northeast Atlantic	Demersal	Bathyal	Chordata	Actinopterygii	Molva molva	13.062	-17.7001
Temperate	Northeast Atlantic	Demersal	Bathyal	Chordata	Actinopterygii	Molva molva	14.3051	-17.1033
Temperate	Northeast Atlantic	Demersal	Bathyal	Chordata	Actinopterygii	Molva molva	14.1983	-16.9336
Temperate	Northeast Atlantic	Benthic	Bathyal	Arthropoda	Malacostraca	Munida sp.	9.68335	-17.1756
Temperate	Northeast Atlantic	Benthic	Bathyal	Arthropoda	Malacostraca	Munida sp.	9.39536	-18.7898
Temperate	Northeast Atlantic	Benthic	Bathyal	Arthropoda	Malacostraca	Munida sp.	8.92575	-17.6776
Temperate	Northeast Atlantic	Benthic	Bathyal	Arthropoda	Malacostraca	Munida sp.	9.2619	-17.6277
Temperate	Northeast Atlantic	Benthic	Bathyal	Arthropoda	Malacostraca	Munida sp.	9.40439	-17.7713
Temperate	Northeast Atlantic	Benthic	Abyssal	Arthropoda	Malacostraca	Munidopsis crassa	14.56	-17.62
Temperate	Northeast Atlantic	Benthic	Abyssal	Arthropoda	Malacostraca	Munidopsis antonii	14.44	-17.75
Temperate	Northeast Atlantic	Benthic	Abyssal	Nematoda		Nematoda	14.33	-16.85
Temperate	Northeast Atlantic	Demersal	Bathyal	Chordata	Actinopterigii	Neocyttus helgae	11.4084	-16.4659
Temperate	Northeast Atlantic	Benthic	Bathyal	Arthropoda	Malacostraca	Nephrops norvegicus	9.4	-17
Temperate	Northeast Atlantic	Demersal	Bathyal	Chordata	Actinopterygii	Nezumia aequalis	11.23	-18.691
Temperate	Northeast Atlantic	Demersal	Bathyal	Chordata	Actinopterygii	Nezumia aequalis	11.97	-18.1627
Temperate	Northeast Atlantic	Demersal	Bathyal	Chordata	Actinopterygii	Nezumia aequalis	12.1	-18.4116
Temperate	Northeast Atlantic	Demersal	Bathyal	Chordata	Actinopterygii	Nezumia aequalis	11.32	-18.4481
Temperate	Northeast Atlantic	Demersal	Bathyal	Chordata	Actinopterygii	Nezumia aequalis	11.33	-17.987
Temperate	Northeast Atlantic	Demersal	Bathyal	Chordata	Actinopterygii	Nezumia aequalis	12.74	-17.4841
Temperate	Northeast Atlantic	Demersal	Bathyal	Chordata	Actinopterygii	Nezumia aequalis	11.4	-17.6014
Temperate	Northeast Atlantic	Demersal	Bathyal	Chordata	Actinopterygii	Nezumia aequalis	11.97	-17.571
Temperate	Northeast Atlantic	Demersal	Bathyal	Chordata	Actinopterygii	Nezumia aequalis	12.75	-18.0061
Temperate	Northeast Atlantic	Demersal	Bathyal	Chordata	Actinopterygii	Nezumia aequalis	13.05	-17.7135
Temperate	Northeast Atlantic	Demersal	Bathyal	Chordata	Actinopterygii	Nezumia aequalis	13.37	-17.2455
Temperate	Northeast Atlantic	Demersal	Bathyal	Chordata	Actinopterygii	Nezumia aequalis	12.74	-17.4851
Temperate	Northeast Atlantic	Demersal	Bathyal	Chordata	Actinopterygii	Nezumia aequalis	12.99	-17.3643
Temperate	Northeast Atlantic	Demersal	Bathyal	Chordata	Actinopterygii	Nezumia aequalis	13.08	-17.2641
Temperate	Northeast Atlantic	Demersal	Bathyal	Chordata	Actinopterygii	Nezumia aequalis	13.09	-17.8178
Temperate	Northeast Atlantic	Demersal	Bathyal	Chordata	Actinopterygii	Nezumia aequalis	12.73	-17.3835
Temperate	Northeast Atlantic	Demersal	Bathyal	Chordata	Actinopterygii	Nezumia aequalis	13.55	-16.7971
Temperate	Northeast Atlantic	Benthic	Abyssal	Annelida	Polychaeta	Nicon sp.	17.66	-16.44
Temperate	Northeast Atlantic	Benthic	Abyssal	Annelida	Polychaeta	Nothria sp.	10.84	-19.92
Temperate	Northeast Atlantic	Benthic	Abyssal	Echinodermata	Holothuroidea	Oneirophanta mutabilis	13.16	-16.32
Temperate	Northeast Atlantic	Benthic	Abyssal	Echinodermata	Ophiuroidea	Ophiocten hastatum	10.7	-17.85
Temperate	Northeast Atlantic	Benthic	Bathyal	Echinodermata	Ophiuroidea	Ophiuroidea spp.	8.32354	-18.6725
Temperate	Northeast Atlantic	Benthic	Bathyal	Echinodermata	Ophiuroidea	Ophiuroidea spp.	8.10259	-22.0738
Temperate	Northeast Atlantic	Demersal	Abyssal	Arthropoda	Malacostraca	Orchomene chevrieux	14.13	-17.45
Temperate	Northeast Atlantic	Demersal	Abyssal	Arthropoda	Malacostraca	Orchomene gerulicorbis	13.4	-16.2
Temperate	Northeast Atlantic	Benthic	Bathyal	Arthropoda	Malacostraca	Pagurus alatus	9.3	-20.5
Temperate	Northeast Atlantic	Demersal	Bathyal	Arthropoda	Malacostraca	Pandalus montagui	9.4	-17.5
Temperate	Northeast Atlantic	Benthic	Abyssal	Arthropoda	Pantopoda	Pantopoda sp 1	14.5	-17.11
Temperate	Northeast Atlantic	Demersal	Abyssal	Arthropoda	Malacostraca	Paralicella caperesca	13.6	-19.15
Temperate	Northeast Atlantic	Benthic	Abyssal	Annelida	Polychaeta	Paramage	13.26	-18.39
Temperate	Northeast Atlantic	Benthic	Abyssal	Annelida	Polychaeta	Paraninoe	15.11	-17.89
Temperate	Northeast Atlantic	Benthic	Abyssal	Cnidaria	Anthozoa	Parasicyonis biotrans	14.8	-14.74
Temperate	Northeast Atlantic	Demersal	Abyssal	Echinodermata	Holothuroidea	Paroriza prouhoi	15.83	-16.53
Temperate	Northeast Atlantic	Demersal	Bathyal	Arthropoda	Malacostraca	Pasiphaea multidentata	9.6	-19.7
Temperate	Northeast Atlantic	Demersal	Bathyal	Arthropoda	Malacostraca	Pasiphaea sivado	9	-18.6
Temperate	Northeast Atlantic	Demersal	Bathyal	Arthropoda	Malacostraca	Pasiphaea sivado	9.3	-19.5
Temperate	Northeast Atlantic	Benthic	Abyssal	Echinodermata	Holothuroidea	Peniagone diaphana	11.61	-16.99
Temperate	Northeast Atlantic	Benthic	Abyssal	Cnidaria	Anthozoa	Pennatulacea	12.31	-14.65
Temperate	Northeast Atlantic	Pelagic	Meso-Bathypelagic	Arthropoda	Malacostraca	Phronima sedentaria	4	-20.5
Temperate	Northeast Atlantic	Demersal	Bathyal	Chordata	Actinopterygii	Phycis blennoides	11.2	-18.1
Temperate	Northeast Atlantic	Demersal	Bathyal	Chordata	Actinopterygii	Phycis blennoides	10.8676	-18.6118
Temperate	Northeast Atlantic	Demersal	Bathyal	Chordata	Actinopterygii	Phycis blennoides	9.98412	-18.8834
Temperate	Northeast Atlantic	Demersal	Bathyal	Chordata	Actinopterygii	Phycis blennoides	11.979	-18.27
Temperate	Northeast Atlantic	Demersal	Bathyal	Chordata	Actinopterygii	Phycis blennoides	11.2576	-17.9934
Temperate	Northeast Atlantic	Demersal	Bathyal	Chordata	Actinopterygii	Phycis blennoides	10.7668	-18.1353
Temperate	Northeast Atlantic	Demersal	Bathyal	Chordata	Actinopterygii	Phycis blennoides	10.5459	-18.367
Temperate	Northeast Atlantic	Demersal	Bathyal	Chordata	Actinopterygii	Phycis blennoides	11.7453	-18.1673
Temperate	Northeast Atlantic	Demersal	Bathyal	Chordata	Actinopterygii	Phycis blennoides	13.6061	-17.121
Temperate	Northeast Atlantic	Demersal	Bathyal	Chordata	Actinopterygii	Phycis blennoides	11.6827	-18.0443
Temperate	Northeast Atlantic	Demersal	Bathyal	Chordata	Actinopterygii	Phycis blennoides	12.5029	-17.7025
Temperate	Northeast Atlantic	Demersal	Abyssal	Arthropoda	Malacostraca	Plesiopenaeus armatus	13.17	-17.38
Temperate	Northeast Atlantic	Benthic	Bathyal	Arthropoda	Malacostraca	Polycheles typhlops	8.4	-17
Temperate	Northeast Atlantic	Demersal	Bathyal	Arthropoda	Malacostraca	Pontophilus spinosus	8.8	-17.9
Temperate	Northeast Atlantic	Demersal	Bathyal	Arthropoda	Malacostraca	Pontophilus spinosus	8.9	-17
Temperate	Northeast Atlantic	Demersal	Abyssal	Arthropoda	Malacostraca	Pralicella tenuipes	15.6	-20.36
Temperate	Northeast Atlantic	Benthic	Abyssal	Echinodermata	Holothuroidea	Protankyra brychia	15.58	-13.91
Temperate	Northeast Atlantic	Demersal	Bathyal	Mollusca	Cephalopoda	Pseudamussium peslutrae	6.2	-18.3
Temperate	Northeast Atlantic	Benthic	Abyssal	Echinodermata	Holothuroidea	Pseudostichopus sp.	13.4	-17.37
Temperate	Northeast Atlantic	Benthic	Abyssal	Echinodermata	Holothuroidea	Pseudostichopus villosus	16.18	-16.06
Temperate	Northeast Atlantic	Benthic	Bathyal	Echinodermata	Holothuroidea	Psolus sp.	9.93446	-17.8717
Temperate	Northeast Atlantic	Benthic	Abyssal	Echinodermata	Holothuroidea	Psychropotes longicauda	13.92	-15.67
Temperate	Northeast Atlantic	Benthic	Abyssal	Echinodermata	Holothuroidea	Psychropotes semperiana	11.93	-18.05
Temperate	Northeast Atlantic	Demersal	Bathyal	Chordata	Actinopterygii	Rhinochimaera atlantica	14.66	-15.9363
Temperate	Northeast Atlantic	Demersal	Bathyal	Chordata	Actinopterygii	Rhinochimaera atlantica	14.2981	-16.1952
Temperate	Northeast Atlantic	Demersal	Bathyal	Chordata	Actinopterygii	Rhinochimaera atlantica	14.77	-15.9619
Temperate	Northeast Atlantic	Demersal	Bathyal	Chordata	Actinopterygii	Rhinochimaera atlantica	13.5222	-16.1665
Temperate	Northeast Atlantic	Demersal	Bathyal	Chordata	Actinopterygii	Rhinochimaera atlantica	14.7257	-16.1039
Temperate	Northeast Atlantic	Demersal	Bathyal	Chordata	Actinopterygii	Rhinochimaera atlantica	14.3394	-16.0677
Temperate	Northeast Atlantic	Demersal	Bathyal	Chordata	Actinopterygii	Rhinochimaera atlantica	14.0625	-15.8503
Temperate	Northeast Atlantic	Demersal	Bathyal	Chordata	Actinopterygii	Rhinochimaera atlantica	14.07	-15.9625
Temperate	Northeast Atlantic	Demersal	Bathyal	Chordata	Actinopterygii	Rhinochimaera atlantica	14.0899	-16.2562
Temperate	Northeast Atlantic	Demersal	Bathyal	Chordata	Actinopterygii	Rhinochimaera atlantica	14.5716	-15.989
Temperate	Northeast Atlantic	Demersal	Bathyal	Chordata	Actinopterygii	Rhinochimaera atlantica	15.5398	-15.723
Temperate	Northeast Atlantic	Pelagic	Meso-Bathypelagic	Arthropoda	Malacostraca	Robustosergia robusta	8.8	-19.8
Temperate	Northeast Atlantic	Demersal	Bathyal	Mollusca	Cephalopoda	Rossia macrosoma	9.1	-18.1
Temperate	Northeast Atlantic	Benthic	Bathyal	Chordata	Ascidiacea	Salpidae sp.	10.3874	-18.8563
Temperate	Northeast Atlantic	Benthic	Abyssal	Cnidaria	Anthozoa	Segonzactis platypus	16.23	-13.64
Temperate	Northeast Atlantic	Demersal	Bathyal	Mollusca	Cephalopoda	Sepiola spp.	11	-19.1
Temperate	Northeast Atlantic	Demersal	Abyssal	Chordata	Actinopterygii	Serrivomer beani	10.28	-18.02
Temperate	Northeast Atlantic	Benthic	Abyssal	Sipuncula	Sipunculidea	Sipunculida	14.03	-15.05
Temperate	Northeast Atlantic	Benthic	Bathyal	Echinodermata	Echinoidea	Spatangus purpureus	8.4	-18.4
Temperate	Northeast Atlantic	Benthic	Bathyal	Porifera	Demospongiae	Spongosorites sp.	8.25812	-17.7099
Temperate	Northeast Atlantic	Benthic	Bathyal	Porifera	Demospongiae	Spongosorites sp.	9.63518	-17.0387
Temperate	Northeast Atlantic	Benthic	Bathyal	Porifera	Demospongiae	Spongosorites sp.	8.60087	-17.133
Temperate	Northeast Atlantic	Benthic	Abyssal	Cnidaria	Anthozoa	stony coral	12.68	-17.57
Temperate	Northeast Atlantic	Demersal	Abyssal	Arthropoda	Malacostraca	Storthyngyra	13.43	-17.36
Temperate	Northeast Atlantic	Demersal	Bathyal	Chordata	Actinopterygii	Synaphobranchus kaupii	9.755	-18.5806
Temperate	Northeast Atlantic	Demersal	Bathyal	Chordata	Actinopterygii	Synaphobranchus kaupii	10.111	-18.8246
Temperate	Northeast Atlantic	Demersal	Bathyal	Chordata	Actinopterygii	Synaphobranchus kaupii	10.4909	-17.9018
Temperate	Northeast Atlantic	Demersal	Bathyal	Chordata	Actinopterygii	Synaphobranchus kaupii	10.9079	-18.8945
Temperate	Northeast Atlantic	Demersal	Bathyal	Chordata	Actinopterygii	Synaphobranchus kaupii	10.8197	-19.2444
Temperate	Northeast Atlantic	Demersal	Bathyal	Chordata	Actinopterygii	Synaphobranchus kaupii	11.2265	-18.7666
Temperate	Northeast Atlantic	Demersal	Bathyal	Chordata	Actinopterygii	Synaphobranchus kaupii	11.9147	-18.7507
Temperate	Northeast Atlantic	Demersal	Bathyal	Chordata	Actinopterygii	Synaphobranchus kaupii	12.248	-19.2404
Temperate	Northeast Atlantic	Demersal	Bathyal	Chordata	Actinopterygii	Synaphobranchus kaupii	10.9273	-19.1681
Temperate	Northeast Atlantic	Demersal	Bathyal	Chordata	Actinopterygii	Synaphobranchus kaupii	10.3731	-19.0567
Temperate	Northeast Atlantic	Benthic	Bathyal	Arthropoda	Malacostraca	Systellaspis debilis	7.8	-19.8
Temperate	Northeast Atlantic	Demersal	Bathyal	Mollusca	Cephalopoda	Todaropsis eblanae	11.5	-19.2
Temperate	Northeast Atlantic	Demersal	Bathyal	Chordata	Actinopterygii	Trachyrhynchus murrayi	12.89	-17.3713
Temperate	Northeast Atlantic	Demersal	Bathyal	Chordata	Actinopterygii	Trachyrhynchus murrayi	12.51	-17.5204
Temperate	Northeast Atlantic	Demersal	Bathyal	Chordata	Actinopterygii	Trachyrhynchus murrayi	12.27	-17.6805
Temperate	Northeast Atlantic	Demersal	Bathyal	Chordata	Actinopterygii	Trachyrhynchus murrayi	12.72	-17.2307
Temperate	Northeast Atlantic	Demersal	Bathyal	Chordata	Actinopterygii	Trachyrhynchus murrayi	12.1	-17.5252
Temperate	Northeast Atlantic	Demersal	Bathyal	Chordata	Actinopterygii	Trachyrhynchus murrayi	13.51	-17.9014
Temperate	Northeast Atlantic	Demersal	Bathyal	Chordata	Actinopterygii	Trachyrhynchus murrayi	12.41	-18.1727
Temperate	Northeast Atlantic	Demersal	Bathyal	Chordata	Actinopterygii	Trachyrhynchus murrayi	14.43	-17.9734
Temperate	Northeast Atlantic	Demersal	Bathyal	Chordata	Actinopterygii	Trachyrhynchus murrayi	12.52	-17.7901
Temperate	Northeast Atlantic	Demersal	Bathyal	Chordata	Actinopterygii	Trachyrhynchus murrayi	12.57	-18.0304
Temperate	Northeast Atlantic	Demersal	Bathyal	Chordata	Actinopterygii	Trachyrhynchus murrayi	12.52	-17.7687
Temperate	Northeast Atlantic	Demersal	Bathyal	Chordata	Actinopterygii	Trachyrhynchus murrayi	13.1	-18.031
Temperate	Northeast Atlantic	Demersal	Bathyal	Chordata	Actinopterygii	Trachyrhynchus murrayi	13.7	-17.62
Temperate	Northeast Atlantic	Demersal	Bathyal	Chordata	Actinopterygii	Trachyrhynchus murrayi	13.47	-17.4224
Temperate	Northeast Atlantic	Demersal	Bathyal	Chordata	Actinopterygii	Trachyrhynchus murrayi	12.94	-17.7301
Temperate	Northeast Atlantic	Demersal	Bathyal	Chordata	Actinopterygii	Trachyrhynchus murrayi	13.09	-17.7103
Temperate	Northeast Atlantic	Demersal	Bathyal	Chordata	Actinopterygii	Trachyrhynchus murrayi	13.24	-17.7961
Temperate	Northeast Atlantic	Demersal	Bathyal	Chordata	Actinopterygii	Trachyrhynchus murrayi	13.44	-17.8061
Temperate	Northeast Atlantic	Demersal	Bathyal	Chordata	Actinopterygii	Trachyrhynchus murrayi	13.52	-17.3999
Temperate	Northeast Atlantic	Demersal	Bathyal	Chordata	Actinopterygii	Trachyrhynchus murrayi	12.86	-17.4334
Temperate	Northeast Atlantic	Benthic	Abyssal	Cnidaria	Anthozoa	Umbellula sp.	15.14	-14.57
Temperate	Northeast Atlantic	Demersal	Abyssal	Arthropoda	Malacostraca	Willemoesia leptodactyla	13.38	-17.92
Temperate	Northeast Atlantic	Pelagic	Abyssopelagic	Chordata	Actinopterygii	Xenodermichthys copei	15.52	-18.62
Temperate	Northeast Atlantic	Pelagic	Meso-Bathypelagic	Chordata	Actinopterygii	Xenodermichthys copei	8.01196	-19.2975
Temperate	Northeast Atlantic	Pelagic	Meso-Bathypelagic	Chordata	Actinopterygii	Xenodermichthys copei	7.87296	-19.0329
Temperate	Northeast Atlantic	Pelagic	Meso-Bathypelagic	Chordata	Actinopterygii	Xenodermichthys copei	7.61265	-18.2559
Temperate	Northeast Atlantic	Pelagic	Meso-Bathypelagic	Chordata	Actinopterygii	Xenodermichthys copei	8.3	-18.9341
Temperate	Northeast Atlantic	Pelagic	Meso-Bathypelagic	Chordata	Actinopterygii	Xenodermichthys copei	6.84663	-18.7466
Temperate	Northeast Atlantic	Pelagic	Meso-Bathypelagic	Chordata	Actinopterygii	Xenodermichthys copei	8.1	-18.7269
Temperate	Northeast Atlantic	Pelagic	Meso-Bathypelagic	Chordata	Actinopterygii	Xenodermichthys copei	9.68451	-18.3276
Temperate	Northeast Atlantic	Pelagic	Meso-Bathypelagic	Chordata	Actinopterygii	Xenodermichthys copei	8.60714	-18.6174
Temperate	Northeast Atlantic	Pelagic	Meso-Bathypelagic	Chordata	Actinopterygii	Xenodermichthys copei	7.3131	-18.5573
Temperate	Northeast Atlantic	Pelagic	Meso-Bathypelagic	Chordata	Actinopterygii	Xenodermichthys copei	7.52041	-18.2977
Temperate	Northeast Atlantic	Pelagic	Meso-Bathypelagic	Chordata	Actinopterygii	Xenodermichthys copei	6.90406	-19.2148
Temperate	Northeast Atlantic	Pelagic	Meso-Bathypelagic	Chordata	Actinopterygii	Xenodermichthys copei	8.33646	-18.6444
Temperate	Northeast Atlantic	Pelagic	Meso-Bathypelagic	Chordata	Actinopterygii	Xenodermichthys copei	8.55676	-18.4668
Temperate	Northeast Atlantic	Demersal	Bathyal	Chordata	Actinopterygii	Zeux faber	13.8	-17.1
Temperate	Northeast Atlantic	Benthic	Abyssal	Cnidaria	Anthozoa	Zoanthidea	14.73	-16.59
Temperate	Northwest Atlantic	Benthic	Bathyal	Cnidaria	Anthozoa	Acanella arbuscula	10.5	-19.4
Temperate	Northwest Atlantic	Pelagic	Meso-bathypelagic	Arthropoda	Malacostraca	Acanthephyra pelagica	9.4	-20.1
Temperate	Northwest Atlantic	Benthic	Bathyal	Cnidaria	Anthozoa	Acanthogorgia armata	11.3	-18.9
Temperate	Northwest Atlantic	Benthic	Bathyal	Cnidaria	Anthozoa	Actinauge cristata	11.1	-18.6
Temperate	Northwest Atlantic	Benthic	Bathyal	Cnidaria	Anthozoa	Actinoscyphia aurelia	11.7	-16.8
Temperate	Northwest Atlantic	Benthic	Bathyal	Cnidaria	Anthozoa	Actinostola callosa	10.8	-18.6
Temperate	Northwest Atlantic	Demersal	Bathyal	Chordata	Actinopterygii	Alepocephalus bairdii	10.89	-19.3589
Temperate	Northwest Atlantic	Demersal	Bathyal	Chordata	Elasmobranchi	Amblyraja jenseni	11.59	-19.4434
Temperate	Northwest Atlantic	Pelagic	Meso-Bathypelagic	Chordata	Actinopterygii	Anoplogaster cornuta	11.5475	-18.6127
Temperate	Northwest Atlantic	Benthic	Bathyal	Cnidaria	Anthozoa	Anthomastus grandiflorus	11.2	-18.7
Temperate	Northwest Atlantic	Benthic	Bathyal	Cnidaria	Anthozoa	Anthomastus spp.	11.1	-13.9
Temperate	Northwest Atlantic	Benthic	Bathyal	Cnidaria	Anthozoa	Anthoptilum grandiflorum	11.6	-19.5
Temperate	Northwest Atlantic	Demersal	Bathyal	Chordata	Actinopterygii	Antimora rostrata	11.22	-19.8826
Temperate	Northwest Atlantic	Demersal	Bathyal	Chordata	Elasmobranchi	Apristurus profundorum	11.3722	-19.5098
Temperate	Northwest Atlantic	Benthic	Bathyal	Arthropoda	Hexanauplia	Arcoscalpellum michelottianum	13.3	-18.9
Temperate	Northwest Atlantic	Pelagic	Meso-Bathypelagic	Chordata	Actinopterygii	Arctozenus risso	9.51	-19.7778
Temperate	Northwest Atlantic	Pelagic	Meso-Bathypelagic	Chordata	Actinopterygii	Bathylagus euryops	9.595	-20.2968
Temperate	Northwest Atlantic	Benthic	Bathyal	Cnidaria	Anthozoa	Bathypathes sp.	10.8	-19.8
Temperate	Northwest Atlantic	Pelagic	Meso-Bathypelagic	Chordata	Actinopterygii	Bathytroctes macrolepis	12.27	-19.7769
Temperate	Northwest Atlantic	Pelagic	Meso-Bathypelagic	Chordata	Actinopterygii	Borostomias antarcticus	10.3575	-19.3877
Temperate	Northwest Atlantic	Benthic	Bathyal	Mollusca	Gastropoda	Buccinum sp.	12.6	-17
Temperate	Northwest Atlantic	Pelagic	Meso-Bathypelagic	Chordata	Actinopterygii	Caristius macropus	13.64	-18.9003
Temperate	Northwest Atlantic	Demersal	Bathyal	Chordata	Elasmobranchi	Centroscyllium fabricii	11.57	-19.6753
Temperate	Northwest Atlantic	Benthic	Bathyal	Echinodermata	Asteroidea	Ceramaster granularis	17	-13.2
Temperate	Northwest Atlantic	Pelagic	Meso-Bathypelagic	Chordata	Actinopterygii	Chauliodus sloani	9.925	-19.8104
Temperate	Northwest Atlantic	Pelagic	Meso-Bathypelagic	Chordata	Actinopterygii	Chiasmodon niger	11.28	-19.2825
Temperate	Northwest Atlantic	Benthic	Bathyal	Porifera	Demospongiae	Cliona sp.	7.7	-17.4
Temperate	Northwest Atlantic	Benthic	Bathyal	Mollusca	Gastropoda	Colus islandicus	14.2	-15
Temperate	Northwest Atlantic	Demersal	Bathyal	Chordata	Actinopterygii	Coryphaenoides rupestris	9.65667	-20.5123
Temperate	Northwest Atlantic	Demersal	Bathyal	Chordata	Actinopterygii	Cottunculus microps	13.845	-18.338
Temperate	Northwest Atlantic	Demersal	Bathyal	Chordata	Actinopterygii	Cottunculus thomsonii	15.6467	-16.8957
Temperate	Northwest Atlantic	Benthic	Bathyal	Porifera	Demospongiae	Craniella cranium	7.5	-18.5
Temperate	Northwest Atlantic	Benthic	Bathyal	Echinodermata	Asteroidea	Ctenodiscus crispatus	12.4	-14.3
Temperate	Northwest Atlantic	Pelagic	Meso-Bathypelagic	Chordata	Actinopterygii	Cyclothone microdon	9.695	-19.6055
Temperate	Northwest Atlantic	Benthic	Bathyal	Cnidaria	Anthozoa	Duva florida	11.5	-18.6
Temperate	Northwest Atlantic	Benthic	Bathyal	Porifera	Hexactinellida	Euplectella spp.	12.9	-16.3
Temperate	Northwest Atlantic	Benthic	Bathyal	Cnidaria	Anthozoa	Flabellum alabastrum	12.8	-17.2
Temperate	Northwest Atlantic	Benthic	Bathyal	Cnidaria	Anthozoa	Freyella microspina	12.3	-9.1
Temperate	Northwest Atlantic	Benthic	Bathyal	Cnidaria	Anthozoa	Funiculina sp.	10.9	-14.8
Temperate	Northwest Atlantic	Demersal	Bathyal	Chordata	Actinopterygii	Gaidropsarus ensis	13.5283	-18.7
Temperate	Northwest Atlantic	Benthic	Bathyal	Porifera	Demospongiae	Geodia sp.	8.7	-17.1
Temperate	Northwest Atlantic	Demersal	Bathyal	Chordata	Actinopterygii	Glyptocephalus cynoglossus	12.8767	-16.9287
Temperate	Northwest Atlantic	Benthic	Bathyal	Echinodermata	Ophiuroidea	Gorgonocephalus sp.	11.8	-14.5
Temperate	Northwest Atlantic	Benthic	Bathyal	Porifera	Demospongiae	Haliclona sp.	7.9	-17.1
Temperate	Northwest Atlantic	Benthic	Bathyal	Porifera	Demospongiae	Hamacantha (Vomerula) carteri	15.4	-14.6
Temperate	Northwest Atlantic	Pelagic	Meso-Bathypelagic	Chordata	Actinopterygii	Haplophryne mollis	12.01	-20.0065
Temperate	Northwest Atlantic	Benthic	Bathyal	Porifera	Hexactinellida	Hexactinellida sp.	6.8	-17.3
Temperate	Northwest Atlantic	Benthic	Bathyal	Echinodermata	Asteroidea	Hippasteria phrygiana	15.8	-15.1
Temperate	Northwest Atlantic	Benthic	Bathyal	Porifera	Demospongiae	Iophon piceum	16.5	-18
Temperate	Northwest Atlantic	Benthic	Bathyal	Annelida	Polychaeta	Laetmonice filicornis	13.7	-16
Temperate	Northwest Atlantic	Pelagic	Meso-Bathypelagic	Chordata	Actinopterygii	Lampadena speculigera	11.52	-19.9485
Temperate	Northwest Atlantic	Pelagic	Meso-Bathypelagic	Chordata	Actinopterygii	Lampanyctus spp.	10.225	-19.3283
Temperate	Northwest Atlantic	Demersal	Bathyal	Chordata	Actinopterygii	Lepidion eques	14.19	-18.999
Temperate	Northwest Atlantic	Benthic	Bathyal	Echinodermata	Asteroidea	Leptychaster arcticus	12.4	-9.6
Temperate	Northwest Atlantic	Benthic	Bathyal	Echinodermata	Asteroidea	Leptychaster arcticus	12.1	-17.2
Temperate	Northwest Atlantic	Demersal	Bathyal	Chordata	Actinopterygii	Macrourus berglax	14.744	-17.8909
Temperate	Northwest Atlantic	Pelagic	Meso-Bathypelagic	Chordata	Actinopterygii	Magnisudis atlantica	9.37	-19.441
Temperate	Northwest Atlantic	Demersal	Bathyal	Chordata	Elasmobranchi	Malacoraja senta	12.63	-19.2607
Temperate	Northwest Atlantic	Pelagic	Meso-Bathypelagic	Chordata	Actinopterygii	Malacosteus niger	9.245	-19.1167
Temperate	Northwest Atlantic	Benthic	Bathyal	Echinodermata	Asteroidea	Mediaster bairdi	16.5	-14.2
Temperate	Northwest Atlantic	Benthic	Bathyal	Echinodermata	Asteroidea	Mediaster bairdi	16	-8.2
Temperate	Northwest Atlantic	Pelagic	Meso-Bathypelagic	Chordata	Actinopterygii	Melanocetus johnsoni	12.71	-18.5657
Temperate	Northwest Atlantic	Pelagic	Meso-Bathypelagic	Chordata	Actinopterygii	Myctophum sp.	8.46	-19.603
Temperate	Northwest Atlantic	Benthic	Bathyal	Echinodermata	Asteroidea	Myxaster sol	16.8	-12.4
Temperate	Northwest Atlantic	Benthic	Bathyal	Mollusca	Gastropoda	Neptunea despecta	15.2	-15.4
Temperate	Northwest Atlantic	Benthic	Bathyal	Annelida	Polychaeta	Nereididae sp.	13.9	-17.1
Temperate	Northwest Atlantic	Demersal	Bathyal	Chordata	Actinopterygii	Nezumia bairdii	14.62	-18.0644
Temperate	Northwest Atlantic	Demersal	Bathyal	Chordata	Actinopterygii	Notacanthus chemnitzii	14.5267	-16.8321
Temperate	Northwest Atlantic	Pelagic	Meso-Bathypelagic	Chordata	Actinopterygii	Notoscopelus sp.	9.575	-19.1615
Temperate	Northwest Atlantic	Pelagic	Meso-bathypelagic	Arthropoda	Malacostraca	Notostomus robustus	11.6	-19.8
Temperate	Northwest Atlantic	Benthic	Bathyal	Echinodermata	Asteroidea	Novodinia americana	12.2	-18
Temperate	Northwest Atlantic	Pelagic	Meso-Bathypelagic	Chordata	Actinopterygii	Oneirodes macrosteus	11.78	-19.7905
Temperate	Northwest Atlantic	Pelagic	Meso-bathypelagic	Arthropoda	Malacostraca	Pandalus borealis	11.1	-19.1
Temperate	Northwest Atlantic	Benthic	Bathyal	Cnidaria	Anthozoa	Paragorgia arborea	10.4	-11.5
Temperate	Northwest Atlantic	Benthic	Bathyal	Cnidaria	Anthozoa	Paragorgia arborea	11.3	-19.9
Temperate	Northwest Atlantic	Benthic	Bathyal	Cnidaria	Anthozoa	Paramuricea sp.	11.7	-18.9
Temperate	Northwest Atlantic	Pelagic	Meso-bathypelagic	Arthropoda	Malacostraca	Pasiphaea tarda	11.4	-19.2
Temperate	Northwest Atlantic	Benthic	Bathyal	Cnidaria	Anthozoa	Pennatula aculeata	10.3	-8.6
Temperate	Northwest Atlantic	Benthic	Bathyal	Cnidaria	Anthozoa	Pennatula grandis	10.5	-13.1
Temperate	Northwest Atlantic	Benthic	Bathyal	Cnidaria	Anthozoa	Pennatula sp.	10.9	-19
Temperate	Northwest Atlantic	Benthic	Bathyal	Porifera	Demospongiae	Phakellia spp.	14.9	-15.8
Temperate	Northwest Atlantic	Benthic	Bathyal	Echinodermata	Echinoidea	Phormosoma placenta	12.3	-14.3
Temperate	Northwest Atlantic	Demersal	Bathyal	Chordata	Actinopterygii	Polyacanthonotus rissoanus	14.7033	-17.3458
Temperate	Northwest Atlantic	Benthic	Bathyal	Annelida	Polychaeta	Polychaeta sp 1	13.2	-15.7
Temperate	Northwest Atlantic	Benthic	Bathyal	Annelida	Polychaeta	Polychaeta sp 2	11.1	-19
Temperate	Northwest Atlantic	Benthic	Bathyal	Annelida	Polychaeta	Polychaeta sp 3	7.9	-15.8
Temperate	Northwest Atlantic	Benthic	Bathyal	Porifera	Demospongiae	Polymastia spp.	14.8	-16.7
Temperate	Northwest Atlantic	Benthic	Bathyal	Annelida	Polychaeta	Polynoidae sp 1	12.6	-17.8
Temperate	Northwest Atlantic	Benthic	Bathyal	Annelida	Polychaeta	Polynoidae sp 2	12	-17.5
Temperate	Northwest Atlantic	Benthic	Bathyal	Cnidaria	Anthozoa	Primnoa resedaeformis	10.3	-20.3
Temperate	Northwest Atlantic	Benthic	Bathyal	Echinodermata	Asteroidea	Psilaster andromeda	16.9	-13
Temperate	Northwest Atlantic	Demersal	Bathyal	Chordata	Elasmobranchi	Rajella fyllae	13.1675	-16.8272
Temperate	Northwest Atlantic	Demersal	Bathyal	Chordata	Actinopterygii	Reinhardtius hippoglossoides	11.54	-19.4539
Temperate	Northwest Atlantic	Pelagic	Meso-bathypelagic	Arthropoda	Malacostraca	Sabinea hystrix	14.9	-16.4
Temperate	Northwest Atlantic	Pelagic	Meso-Bathypelagic	Chordata	Actinopterygii	Scopeloberyx opisthopterus	11.945	-19.4217
Temperate	Northwest Atlantic	Pelagic	Meso-Bathypelagic	Chordata	Actinopterygii	Scopelosaurus lepidus	11.12	-19.7613
Temperate	Northwest Atlantic	Demersal	Bathyal	Chordata	Actinopterygii	Sebastes mentella	11.21	-19.7886
Temperate	Northwest Atlantic	Demersal	Bathyal	Chordata	Actinopterygii	Serrivomer beanii	9.37333	-20.1755
Temperate	Northwest Atlantic	Benthic	Bathyal	Sipuncula	Sipunculidea	Sipunculidea sp 1	11.4	-16
Temperate	Northwest Atlantic	Benthic	Bathyal	Sipuncula	Sipunculidea	Sipunculidea sp 2	15	-15.3
Temperate	Northwest Atlantic	Benthic	Bathyal	Porifera	Demospongiae	Stelletta spp.	8	-17.2
Temperate	Northwest Atlantic	Benthic	Bathyal	Arthropoda	Malacostraca	Stereomastis sculpta	12.6	-19.2
Temperate	Northwest Atlantic	Demersal	Bathyal	Chordata	Actinopterygii	Synaphobranchus kaupii	12.2067	-18.8105
Temperate	Northwest Atlantic	Benthic	Bathyal	Porifera	Demospongiae	Tentorium semisuberites	15.5	-17.6
Temperate	Northwest Atlantic	Benthic	Bathyal	Porifera	Demospongiae	Thenea muricata	14.2	-17.4
Temperate	Northwest Atlantic	Demersal	Bathyal	Chordata	Actinopterygii	Trachyrhynchus murrayi	14.5567	-18.6109
Temperate	Northwest Atlantic	Benthic	Bathyal	Cnidaria	Anthozoa	Umbellula sp.	11.7	-19.3
Temperate	Northwest Atlantic	Pelagic	Meso-Bathypelagic	Chordata	Actinopterygii	Xenodermichthys copei	9.3925	-19.7416
Temperate	Northwest Atlantic	Benthic	Bathyal	Echinodermata	Asteroidea	Zoroaster fulgens	14.1	-6.3
Temperate	Northwest Atlantic	Benthic	Bathyal	Echinodermata	Asteroidea	Zoroaster fulgens	11.6	-12.9
Temperate	Sea of Japan	Benthic	Bathyal	Mollusca	Bivalvia	Cardiomya beringensis	12.8	-20
Temperate	Sea of Japan	Benthic	Bathyal	Mollusca	Bivalvia	Cardiomya beringensis	12.9	-19.8
Temperate	Sea of Japan	Benthic	Bathyal	Arthropoda	Malacostraca	Chionoecetes japonicus	13.5	-19.9
Temperate	Sea of Japan	Benthic	Bathyal	Echinodermata	Asteroidea	Ctenodiscus crispatus	12.6	-16.7
Temperate	Sea of Japan	Benthic	Bathyal	Echinodermata	Asteroidea	Ctenodiscus crispatus	13.6	-17.4
Temperate	Sea of Japan	Benthic	Bathyal	Echinodermata	Asteroidea	Ctenodiscus crispatus	15.5	-16.1
Temperate	Sea of Japan	Benthic	Bathyal	Arthropoda	Malacostraca	Eualus biungus	11.5	-19.7
Temperate	Sea of Japan	Benthic	Bathyal	Mollusca	Scaphopoda	Fustiaria nipponica	9.3	-18.5
Temperate	Sea of Japan	Benthic	Bathyal	Echinodermata	Crinoidea	Heliometra glacialis	9.6	-22.3
Temperate	Sea of Japan	Benthic	Bathyal	Mollusca	Bivalvia	Megayoldia sp.	6	-18.1
Temperate	Sea of Japan	Benthic	Bathyal	Mollusca	Bivalvia	Megayoldia sp.	6.6	-17.6
Temperate	Sea of Japan	Benthic	Bathyal	Mollusca	Bivalvia	Megayoldia sp.	6.5	-18
Temperate	Sea of Japan	Benthic	Bathyal	Echinodermata	Ophiuroidea	Ophiura leptoctenia	9.1	-21.1
Temperate	Sea of Japan	Benthic	Bathyal	Mollusca	Bivalvia	Robaia robai	8.2	-18.2
Temperate	Sea of Japan	Benthic	Bathyal	Mollusca	Bivalvia	Robaia robai	8	-18.9
Temperate	western Mediterranean	Benthic	Bathyal	Mollusca	Bivalvia	Abra longicallus	6.26	-16.71
Temperate	western Mediterranean	Pelagic	Mesopelagic	Mollusca	Cephalopoda	Abralia veranyi	9.37	-19.82
Temperate	western Mediterranean	Pelagic	Mesopelagic	Mollusca	Cephalopoda	Abralia veranyi	9.98	-19.21
Temperate	western Mediterranean	Pelagic	Mesopelagic	Mollusca	Cephalopoda	Abralia veranyi	9.66	-19.63
Temperate	western Mediterranean	Pelagic	Meso-Bathypelagic	Arthropoda	Malacostraca	Acanthephyra eximia	8.2	-17.1
Temperate	western Mediterranean	Pelagic	Bathypelagic	Arthropoda	Malacostraca	Acanthephyra eximia	8.35	-18.11
Temperate	western Mediterranean	Pelagic	Bathypelagic	Arthropoda	Malacostraca	Acanthephyra eximia	8.87	-17.98
Temperate	western Mediterranean	Pelagic	Meso-Bathypelagic	Arthropoda	Malacostraca	Acanthephyra eximia	8.4	-16
Temperate	western Mediterranean	Pelagic	Meso-Bathypelagic	Arthropoda	Malacostraca	Acanthephyra eximia	7.5	-16.2
Temperate	western Mediterranean	Pelagic	Meso-Bathypelagic	Arthropoda	Malacostraca	Acanthephyra eximia	8.1	-16
Temperate	western Mediterranean	Pelagic	Meso-Bathypelagic	Arthropoda	Malacostraca	Acanthephyra eximia	6.9	-16.3
Temperate	western Mediterranean	Pelagic	Bathypelagic	Arthropoda	Malacostraca	Acanthephyra pelagica	7.33	-18.28
Temperate	western Mediterranean	Pelagic	Meso-Bathypelagic	Arthropoda	Malacostraca	Acanthephyra pelagica	6.9	-17.4
Temperate	western Mediterranean	Pelagic	Meso-Bathypelagic	Arthropoda	Malacostraca	Acanthephyra pelagica	6.7	-16.7
Temperate	western Mediterranean	Demersal	Bathyal	Chordata	Actinopterygii	Alepocephalus rostratus	10.02	-19.92
Temperate	western Mediterranean	Demersal	Bathyal	Chordata	Actinopterygii	Alepocephalus rostratus	9.86	-19.12
Temperate	western Mediterranean	Demersal	Bathyal	Chordata	Actinopterygii	Alepocephalus rostratus	10.59	-19.54
Temperate	western Mediterranean	Demersal	Bathyal	Arthropoda	Malacostraca	Alpheus glaber	7.31	-18.1
Temperate	western Mediterranean	Demersal	Bathyal	Arthropoda	Malacostraca	Alpheus glaber	6.98	-16.71
Temperate	western Mediterranean	Benthic	Bathyal	Echinodermata	Ophiuroidea	Amphipholis squamata	4.05	-20.97
Temperate	western Mediterranean	Benthic	Bathyal	Echinodermata	Ophiuroidea	Amphiura chiajei	4.45	-19.65
Temperate	western Mediterranean	Benthic	Bathyal	Arthropoda	Malacostraca	Anchialina agilis	4.67	-19.82
Temperate	western Mediterranean	Pelagic	Mesopelagic	Mollusca	Cephalopoda	Ancistrocheirus lesueurii	9.62	-20.18
Temperate	western Mediterranean	Pelagic	Mesopelagic	Mollusca	Cephalopoda	Ancistroteuthis lichtensteinii	10.07	-19.35
Temperate	western Mediterranean	Benthic	Bathyal	Annelida	Polychaeta	Aphroditidae sp.	7.28	-17.78
Temperate	western Mediterranean	Benthic	Bathyal	Mollusca	Gastropoda	Aporrhais serresianus	5.06	-16.45
Temperate	western Mediterranean	Pelagic	Mesopelagic	Chordata	Actinopterygii	Arctozenus risso	7.2	-18.43
Temperate	western Mediterranean	Pelagic	Mesopelagic	Chordata	Actinopterygii	Arctozenus risso	8.44	-19.85
Temperate	western Mediterranean	Pelagic	Bathypelagic	Chordata	Actinopterygii	Argyropelecus hemigymnus	7.8	-20.52
Temperate	western Mediterranean	Pelagic	Mesopelagic	Chordata	Actinopterygii	Argyropelecus hemigymnus	8.97	-19.1
Temperate	western Mediterranean	Pelagic	Mesopelagic	Chordata	Actinopterygii	Argyropelecus hemigymnus	6.42	-20.21
Temperate	western Mediterranean	Pelagic	Mesopelagic	Chordata	Actinopterygii	Argyropelecus hemigymnus	8.24	-19.24
Temperate	western Mediterranean	Pelagic	Mesopelagic	Chordata	Actinopterygii	Argyropelecus hemigymnus	6.55	-20.24
Temperate	western Mediterranean	Pelagic	Mesopelagic	Chordata	Actinopterygii	Argyropelecus hemigymnus	6.23	-18.51
Temperate	western Mediterranean	Benthic	Bathyal	Arthropoda	Malacostraca	Aristeus antennatus	10.06	-17.95
Temperate	western Mediterranean	Benthic	Bathyal	Arthropoda	Malacostraca	Aristeus antennatus	10.32	-17.77
Temperate	western Mediterranean	Benthic	Bathyal	Arthropoda	Malacostraca	Aristeus antennatus	9.5	-15.7
Temperate	western Mediterranean	Benthic	Bathyal	Arthropoda	Malacostraca	Aristeus antennatus	9.61	-17.59
Temperate	western Mediterranean	Benthic	Bathyal	Arthropoda	Malacostraca	Aristeus antennatus	10.35	-17.28
Temperate	western Mediterranean	Benthic	Bathyal	Arthropoda	Malacostraca	Aristeus antennatus	10.53	-17.29
Temperate	western Mediterranean	Benthic	Bathyal	Arthropoda	Malacostraca	Aristeus antennatus	9.7	-15.3
Temperate	western Mediterranean	Benthic	Bathyal	Arthropoda	Malacostraca	Aristeus antennatus	8.8	-15.5
Temperate	western Mediterranean	Benthic	Bathyal	Arthropoda	Malacostraca	Aristeus antennatus	8.7	-15.9
Temperate	western Mediterranean	Benthic	Bathyal	Arthropoda	Malacostraca	Aristeus antennatus	8.3	-14.3
Temperate	western Mediterranean	Benthic	Bathyal	Arthropoda	Malacostraca	Aristeus antennatus	8.5	-13.8
Temperate	western Mediterranean	Benthic	Bathyal	Sipuncula	Phascolosomatidea	Aspidosiphon muelleri muelleri	5.39	-16.89
Temperate	western Mediterranean	Benthic	Bathyal	Arthropoda	Malacostraca	Bathymedon longirostris	7.31	-19.22
Temperate	western Mediterranean	Benthic	Bathyal	Mollusca	Cephalopoda	Bathypolypus sponsalis	7.2	-16.2
Temperate	western Mediterranean	Benthic	Bathyal	Mollusca	Cephalopoda	Bathypolypus sponsalis	9.18	-18.46
Temperate	western Mediterranean	Benthic	Bathyal	Mollusca	Cephalopoda	Bathypolypus sponsalis	9.61	-18.39
Temperate	western Mediterranean	Demersal	Bathyal	Chordata	Actinopterygii	Bathypterois dubius	10.97	-18.05
Temperate	western Mediterranean	Demersal	Bathyal	Chordata	Actinopterygii	Bathypterois dubius	11.2	-17.3
Temperate	western Mediterranean	Demersal	Bathyal	Chordata	Actinopterygii	Bathypterois dubius	11.58	-17.99
Temperate	western Mediterranean	Pelagic	Mesopelagic	Chordata	Actinopterygii	Benthosema glaciale	8.5	-20.8
Temperate	western Mediterranean	Pelagic	Mesopelagic	Chordata	Actinopterygii	Benthosema glaciale	9.01	-21.56
Temperate	western Mediterranean	Pelagic	Mesopelagic	Chordata	Actinopterygii	Benthosema glaciale	8.5	-19.59
Temperate	western Mediterranean	Pelagic	Mesopelagic	Chordata	Actinopterygii	Benthosema glaciale	9.01	-19.75
Temperate	western Mediterranean	Benthic	Bathyal	Annelida	Polychaeta	Bonellia viridis	9.18	-16.21
Temperate	western Mediterranean	Pelagic	Mesopelagic	Arthropoda	Malacostraca	Boreomysis arctica	6.33	-19.81
Temperate	western Mediterranean	Pelagic	Mesopelagic	Arthropoda	Malacostraca	Boreomysis arctica	6.59	-19.15
Temperate	western Mediterranean	Pelagic	Mesopelagic	Arthropoda	Malacostraca	Boreomysis arctica	6.64	-19.89
Temperate	western Mediterranean	Benthic	Bathyal	Arthropoda	Malacostraca	Boreomysis arctica	6.53	-19.96
Temperate	western Mediterranean	Benthic	Bathyal	Arthropoda	Malacostraca	Boreomysis megalops	6.25	-19.71
Temperate	western Mediterranean	Benthic	Bathyal	Arthropoda	Malacostraca	Bruzelia typica	7.58	-18.59
Temperate	western Mediterranean	Benthic	Bathyal	Arthropoda	Malacostraca	Bruzelia typica	8.54	-18.69
Temperate	western Mediterranean	Benthic	Bathyal	Echinodermata	Echinoidea	Bryssopsis lyrifera	9.09	-17.9
Temperate	western Mediterranean	Pelagic	Mesopelagic	Arthropoda	Malacostraca	Calanoidea unid	3.7	-21.73
Temperate	western Mediterranean	Pelagic	Mesopelagic	Arthropoda	Malacostraca	Calanus helgolandicus	5.65	-20.38
Temperate	western Mediterranean	Benthic	Bathyal	Arthropoda	Malacostraca	Calocaris macandreae	5.17	-21.9
Temperate	western Mediterranean	Benthic	Bathyal	Arthropoda	Malacostraca	Calocaris macandreae	6.21	-19.2
Temperate	western Mediterranean	Benthic	Bathyal	Arthropoda	Malacostraca	Calocaris macandreae	7.15	-18.74
Temperate	western Mediterranean	Benthic	Bathyal	Arthropoda	Malacostraca	Calocaris macandreae	4.74	-20.95
Temperate	western Mediterranean	Benthic	Bathyal	Arthropoda	Malacostraca	Calocaris macandreae	5.66	-17.12
Temperate	western Mediterranean	Benthic	Bathyal	Arthropoda	Malacostraca	Campylaspis sulcata	9.55	-21.28
Temperate	western Mediterranean	Benthic	Bathyal	Arthropoda	Malacostraca	Campylaspis verrucosa	8.4	-18.54
Temperate	western Mediterranean	Pelagic	Mesopelagic	Arthropoda	Malacostraca	Candacia sp.	6.58	-20.39
Temperate	western Mediterranean	Pelagic	Mesopelagic	Arthropoda	Malacostraca	Candacia tenuimana	9	-18.82
Temperate	western Mediterranean	Benthic	Bathyal	Annelida	Polychaeta	Capitellidae sp.	7.34	-16.43
Temperate	western Mediterranean	Demersal	Bathyal	Chordata	Actinopterygii	Capros aper	8.94	-19.83
Temperate	western Mediterranean	Demersal	Bathyal	Chordata	Actinopterygii	Capros aper	8.3	-19.93
Temperate	western Mediterranean	Demersal	Bathyal	Chordata	Actinopterygii	Cataetyx laticeps	12.75	-18.3
Temperate	western Mediterranean	Pelagic	Mesopelagic	Mollusca	Gastropoda	Cavolinia inflexa	5.36	-21.76
Temperate	western Mediterranean	Demersal	Bathyal	Chordata	Elasmobranchi	Centroscymnus coelolepis	11.35	-16.87
Temperate	western Mediterranean	Demersal	Bathyal	Chordata	Elasmobranchi	Centroscymnus coelolepis	11.69	-17.82
Temperate	western Mediterranean	Pelagic	Mesopelagic	Chordata	Actinopterygii	Ceratoscopelus maderensis	7.66	-19.74
Temperate	western Mediterranean	Pelagic	Mesopelagic	Chordata	Actinopterygii	Ceratoscopelus maderensis	8.16	-21.06
Temperate	western Mediterranean	Pelagic	Mesopelagic	Chordata	Actinopterygii	Ceratoscopelus maderensis	8.59	-19.79
Temperate	western Mediterranean	Pelagic	Mesopelagic	Chordata	Actinopterygii	Ceratoscopelus maderensis	8.08	-19.25
Temperate	western Mediterranean	Pelagic	Mesopelagic	Chordata	Actinopterygii	Ceratoscopelus maderensis	8.35	-20.14
Temperate	western Mediterranean	Benthic	Bathyal	Nemertea	Anopla	Cerebratulus sp.	8.49	-16.59
Temperate	western Mediterranean	Benthic	Bathyal	Arthropoda	Malacostraca	Chaceon mediterraneus	11.66	-16.81
Temperate	western Mediterranean	Benthic	Bathyal	Arthropoda	Malacostraca	Chaceon mediterraneus	10.21	-17.84
Temperate	western Mediterranean	Pelagic	Mesopelagic	Chaetognatha	Sagittoidea	Chaetognatha sp.	5.59	-18.74
Temperate	western Mediterranean	Pelagic	Mesopelagic	Chordata	Actinopterygii	Chauliodus sloani	7.12	-20.7
Temperate	western Mediterranean	Pelagic	Bathypelagic	Chordata	Actinopterygii	Chauliodus sloani	8.31	-18.39
Temperate	western Mediterranean	Pelagic	Mesopelagic	Cnidaria	Hydrozoa	Chelophyes appendi	5.17	-21.43
Temperate	western Mediterranean	Benthic	Bathyal	Annelida	Polychaeta	Chirimia biceps	8.94	-17.58
Temperate	western Mediterranean	Demersal	Bathyal	Arthropoda	Malacostraca	Chlorotocus crassicornis	7.09	-18.97
Temperate	western Mediterranean	Pelagic	Mesopelagic	Arthropoda	Malacostraca	Copepoda sp.	4.55	-20.68
Temperate	western Mediterranean	Benthic	Bathyal	Arthropoda	Malacostraca	Copepods	6.4	-20.68
Temperate	western Mediterranean	Demersal	Bathyal	Chordata	Actinopterygii	Coryphaenoides guentheri	11.11	-16.87
Temperate	western Mediterranean	Demersal	Bathyal	Chordata	Actinopterygii	Coryphaenoides guentheri	10.74	-17.21
Temperate	western Mediterranean	Demersal	Bathyal	Chordata	Actinopterygii	Coryphaenoides mediterraneus	10.97	-16.56
Temperate	western Mediterranean	Demersal	Bathyal	Chordata	Actinopterygii	Coryphaenoides mediterraneus	11.27	-17.32
Temperate	western Mediterranean	Benthic	Bathyal	Arthropoda	Malacostraca	Cumacea sp.	7.54	-18.99
Temperate	western Mediterranean	Benthic	Bathyal	Arthropoda	Malacostraca	Cyclaspis longicaudata	3.54	-16.69
Temperate	western Mediterranean	Pelagic	Mesopelagic	Chordata	Actinopterygii	Cyclothone braueri	7.11	-19.63
Temperate	western Mediterranean	Pelagic	Mesopelagic	Chordata	Actinopterygii	Cyclothone braueri	6.92	-19.4
Temperate	western Mediterranean	Pelagic	Mesopelagic	Chordata	Actinopterygii	Cyclothone braueri	6.85	-20.17
Temperate	western Mediterranean	Pelagic	Mesopelagic	Chordata	Actinopterygii	Cyclothone braueri	6.91	-19.64
Temperate	western Mediterranean	Pelagic	Mesopelagic	Chordata	Actinopterygii	Cyclothone braueri	6.92	-19.41
Temperate	western Mediterranean	Pelagic	Mesopelagic	Chordata	Actinopterygii	Cyclothone braueri	4.03	-19.38
Temperate	western Mediterranean	Pelagic	Mesopelagic	Chordata	Actinopterygii	Cyclothone braueri	6.09	-20.55
Temperate	western Mediterranean	Pelagic	Mesopelagic	Chordata	Actinopterygii	Cyclothone braueri	6.81	-19.54
Temperate	western Mediterranean	Pelagic	Mesopelagic	Chordata	Actinopterygii	Cyclothone pygmaea	2.8	-20.08
Temperate	western Mediterranean	Pelagic	Mesopelagic	Chordata	Actinopterygii	Cyclothone pygmeus	6.61	-20.17
Temperate	western Mediterranean	Pelagic	Mesopelagic	Mollusca	Gastropoda	Cymbulia peroni	3.73	-20.38
Temperate	western Mediterranean	Pelagic	Mesopelagic	Mollusca	Gastropoda	Cymbulia peroni	3.91	-20.56
Temperate	western Mediterranean	Pelagic	Mesopelagic	Mollusca	Gastropoda	Cymbulia peroni	4.17	-21.2
Temperate	western Mediterranean	Pelagic	Mesopelagic	Mollusca	Gastropoda	Cymbulia peroni	5.77	-21.1
Temperate	western Mediterranean	Pelagic	Mesopelagic	Chordata	Actinopterygii	Diaphus holti	9.42	-21.24
Temperate	western Mediterranean	Pelagic	Mesopelagic	Chordata	Actinopterygii	Diaphus holti	8.94	-19.42
Temperate	western Mediterranean	Pelagic	Mesopelagic	Chordata	Actinopterygii	Diaphus holti	9.91	-20.93
Temperate	western Mediterranean	Pelagic	Mesopelagic	Chordata	Actinopterygii	Electrona risso	8.18	-19.54
Temperate	western Mediterranean	Pelagic	Mesopelagic	Chordata	Actinopterygii	Electrona risso	8.37	-20.56
Temperate	western Mediterranean	Pelagic	Mesopelagic	Chordata	Actinopterygii	Electrona risso	8.19	-19.55
Temperate	western Mediterranean	Pelagic	Mesopelagic	Chordata	Actinopterygii	Electrona risso	8.37	-20.19
Temperate	western Mediterranean	Benthic	Bathyal	Arthropoda	Malacostraca	Epimeria parasitica	6.38	-20.32
Temperate	western Mediterranean	Pelagic	Mesopelagic	Arthropoda	Malacostraca	Eucopia henseni	7.7	-16.9
Temperate	western Mediterranean	Pelagic	Mesopelagic	Arthropoda	Malacostraca	Eucopia unguiculata	6.87	-20.45
Temperate	western Mediterranean	Pelagic	Mesopelagic	Arthropoda	Malacostraca	Euphausia kroni	6.13	-20.49
Temperate	western Mediterranean	Pelagic	Mesopelagic	Arthropoda	Malacostraca	Euprimno macropus	3.65	-20.18
Temperate	western Mediterranean	Pelagic	Bathypelagic	Arthropoda	Malacostraca	Eusergestes arcticus	6.4	-20.71
Temperate	western Mediterranean	Pelagic	Mesopelagic	Arthropoda	Malacostraca	Eusergestes arcticus	6.68	-20.75
Temperate	western Mediterranean	Pelagic	Meso-Bathypelagic	Arthropoda	Malacostraca	Eusergestes arcticus	6.7	-18.9
Temperate	western Mediterranean	Pelagic	Mesopelagic	Arthropoda	Malacostraca	Eusergestes arcticus	6.72	-18.94
Temperate	western Mediterranean	Pelagic	Mesopelagic	Arthropoda	Malacostraca	Eusergestes arcticus	5.56	-20.36
Temperate	western Mediterranean	Demersal	Bathyal	Chordata	Elasmobranchi	Galeus melastomus	8.51	-18.31
Temperate	western Mediterranean	Demersal	Bathyal	Chordata	Elasmobranchi	Galeus melastomus	9.93	-18.09
Temperate	western Mediterranean	Demersal	Bathyal	Chordata	Elasmobranchi	Galeus melastomus	10.01	-17.91
Temperate	western Mediterranean	Demersal	Bathyal	Chordata	Elasmobranchii	Galeus melastomus	10.04	-16.93
Temperate	western Mediterranean	Pelagic	Mesopelagic	Mollusca	Cephalopoda	Galiteuthis armata	8.75	-19.51
Temperate	western Mediterranean	Benthic	Bathyal	Arthropoda	Malacostraca	Gennadas elegans	5.48	-20.89
Temperate	western Mediterranean	Benthic	Bathyal	Arthropoda	Malacostraca	Gennadas elegans	6.57	-17.88
Temperate	western Mediterranean	Benthic	Bathyal	Arthropoda	Malacostraca	Gennadas elegans	5.95	-20.37
Temperate	western Mediterranean	Benthic	Bathyal	Arthropoda	Malacostraca	Gennadas elegans	7.45	-20.18
Temperate	western Mediterranean	Benthic	Bathyal	Arthropoda	Malacostraca	Geryon longipes	9.8	-18.09
Temperate	western Mediterranean	Benthic	Bathyal	Arthropoda	Malacostraca	Geryon longipes	9.68	-17.72
Temperate	western Mediterranean	Benthic	Bathyal	Arthropoda	Malacostraca	Geryon longipes	9.1	-15.6
Temperate	western Mediterranean	Benthic	Bathyal	Arthropoda	Malacostraca	Geryon longipes	9.16	-15.8
Temperate	western Mediterranean	Benthic	Bathyal	Arthropoda	Malacostraca	Geryon longipes	9.22	-17.29
Temperate	western Mediterranean	Benthic	Bathyal	Arthropoda	Malacostraca	Geryon longipes	9.5	-16.6
Temperate	western Mediterranean	Demersal	Bathyal	Chordata	Actinopterygii	Glossanodon leioglossus	9.48	-19.49
Temperate	western Mediterranean	Benthic	Bathyal	Arthropoda	Malacostraca	Gnathia sp.	9.88	-19.53
Temperate	western Mediterranean	Benthic	Bathyal	Arthropoda	Malacostraca	Gnathia sp.	9.89	-19.17
Temperate	western Mediterranean	Benthic	Bathyal	Arthropoda	Malacostraca	Gnathia sp.	9.56	-19.88
Temperate	western Mediterranean	Benthic	Bathyal	Brachiopoda	Rhynchonellata	Gryphus vitreus	8.61	-14.47
Temperate	western Mediterranean	Benthic	Bathyal	Brachiopoda	Rhynchonellata	Gryphus vitreus	9.17	-15.46
Temperate	western Mediterranean	Benthic	Bathyal	Brachiopoda	Rhynchonellata	Gryphus vitreus	10.2	-12.98
Temperate	western Mediterranean	Benthic	Bathyal	Arthropoda	Malacostraca	Harpinia spp.	7.46	-20.48
Temperate	western Mediterranean	Demersal	Bathyal	Chordata	Actinopterygii	Helicolenus dactylopterus	10.38	-18.88
Temperate	western Mediterranean	Benthic	Bathyal	Arthropoda	Malacostraca	Hemilamprops normani	5.05	-21.67
Temperate	western Mediterranean	Pelagic	Mesopelagic	Mollusca	Cephalopoda	Heteroteuthis dispar	9.11	-19.65
Temperate	western Mediterranean	Pelagic	Mesopelagic	Mollusca	Cephalopoda	Heteroteuthis dispar	9.02	-19.93
Temperate	western Mediterranean	Pelagic	Meso-Bathypelagic	Mollusca	Cephalopoda	Heteroteuthis dispar	8	-16.7
Temperate	western Mediterranean	Pelagic	Meso-Bathypelagic	Mollusca	Cephalopoda	Heteroteuthis dispar	9	-17.4
Temperate	western Mediterranean	Pelagic	Mesopelagic	Mollusca	Cephalopoda	Histioteuthis bonnellii	10.02	-20.44
Temperate	western Mediterranean	Pelagic	Mesopelagic	Mollusca	Cephalopoda	Histioteuthis reversa	9.84	-20.08
Temperate	western Mediterranean	Pelagic	Mesopelagic	Mollusca	Cephalopoda	Histioteuthis reversa	10.45	-20.17
Temperate	western Mediterranean	Pelagic	Mesopelagic	Mollusca	Cephalopoda	Histioteuthis reversa	8.5	-18.3
Temperate	western Mediterranean	Pelagic	Mesopelagic	Mollusca	Cephalopoda	Histioteuthis reversa	8.2	-18
Temperate	western Mediterranean	Pelagic	Mesopelagic	Chordata	Actinopterygii	Hygophum benoiti	7.98	-19.35
Temperate	western Mediterranean	Pelagic	Mesopelagic	Chordata	Actinopterygii	Hygophum benoiti	7.53	-19.27
Temperate	western Mediterranean	Pelagic	Mesopelagic	Chordata	Actinopterygii	Hygophum benoiti	7.54	-19.08
Temperate	western Mediterranean	Pelagic	Mesopelagic	Chordata	Actinopterygii	Hygophum benoiti	7.99	-19.27
Temperate	western Mediterranean	Pelagic	Mesopelagic	Chordata	Actinopterygii	Hygophum hygomii	9.18	-18.94
Temperate	western Mediterranean	Pelagic	Mesopelagic	Chordata	Actinopterygii	Hygophum hygomii	9.08	-20.23
Temperate	western Mediterranean	Pelagic	Mesopelagic	Chordata	Actinopterygii	Hygophum hygomii	9.18	-18.94
Temperate	western Mediterranean	Pelagic	Mesopelagic	Chordata	Actinopterygii	Hygophum hygomii	9.08	-20.23
Temperate	western Mediterranean	Pelagic	Mesopelagic	Mollusca	Cephalopoda	Illex coindetii	9.15	-18.55
Temperate	western Mediterranean	Pelagic	Mesopelagic	Mollusca	Cephalopoda	Illex coindetii	9.14	-18.65
Temperate	western Mediterranean	Benthic	Bathyal	Annelida	Polychaeta	Labioleanira hyleni	8.85	-16.53
Temperate	western Mediterranean	Pelagic	Bathypelagic	Chordata	Actinopterygii	Lampanyctus crocodilus	7.59	-20.07
Temperate	western Mediterranean	Pelagic	Bathypelagic	Chordata	Actinopterygii	Lampanyctus crocodilus	8.46	-19.77
Temperate	western Mediterranean	Pelagic	Mesopelagic	Chordata	Actinopterygii	Lampanyctus crocodilus	9.17	-19.09
Temperate	western Mediterranean	Pelagic	Mesopelagic	Chordata	Actinopterygii	Lampanyctus crocodilus	9.85	-18.73
Temperate	western Mediterranean	Pelagic	Mesopelagic	Chordata	Actinopterygii	Lampanyctus crocodilus	7.89	-19.67
Temperate	western Mediterranean	Pelagic	Mesopelagic	Chordata	Actinopterygii	Lampanyctus crocodilus	7.84	-20.45
Temperate	western Mediterranean	Pelagic	Mesopelagic	Chordata	Actinopterygii	Lampanyctus crocodilus	9.55	-18.87
Temperate	western Mediterranean	Pelagic	Mesopelagic	Chordata	Actinopterygii	Lampanyctus crocodilus	7.86	-20.07
Temperate	western Mediterranean	Pelagic	Mesopelagic	Chordata	Actinopterygii	Lampanyctus crocodilus	9.66	-18.83
Temperate	western Mediterranean	Pelagic	Mesopelagic	Chordata	Actinopterygii	Lampanyctus crocodilus-juv	5.02	-19.79
Temperate	western Mediterranean	Pelagic	Mesopelagic	Chordata	Actinopterygii	Lampanyctus crocodilus-L	7.62	-17.17
Temperate	western Mediterranean	Pelagic	Mesopelagic	Chordata	Actinopterygii	Lampanyctus pusillus	8.24	-20.06
Temperate	western Mediterranean	Pelagic	Mesopelagic	Chordata	Actinopterygii	Lampanyctus pusillus	9.15	-20.51
Temperate	western Mediterranean	Pelagic	Mesopelagic	Chordata	Actinopterygii	Lampanyctus pusillus	8.7	-19.7
Temperate	western Mediterranean	Pelagic	Mesopelagic	Cnidaria	Hydrozoa	Lensia sp.	5.37	-18.71
Temperate	western Mediterranean	Benthic	Bathyal	Arthropoda	Malacostraca	Lepechinella manco	2.84	-20.45
Temperate	western Mediterranean	Benthic	Bathyal	Arthropoda	Malacostraca	Lepechinella manco	3.08	-20.67
Temperate	western Mediterranean	Pelagic	Bathypelagic	Chordata	Actinopterygii	Lepidion lepidion	11.2	-17.56
Temperate	western Mediterranean	Pelagic	Bathypelagic	Chordata	Actinopterygii	Lepidion lepidion	11.65	-16.61
Temperate	western Mediterranean	Pelagic	Mesopelagic	Chordata	Actinopterygii	Lepidion lepidion	7.58	-20.37
Temperate	western Mediterranean	Pelagic	Mesopelagic	Chordata	Actinopterygii	Lepidion lepidion	11.32	-18.61
Temperate	western Mediterranean	Demersal	Bathyal	Chordata	Actinopterygii	Lepidorhombus boscii	9.3	-18.76
Temperate	western Mediterranean	Demersal	Bathyal	Chordata	Actinopterygii	Lepidorhombus boscii	9.9	-18.76
Temperate	western Mediterranean	Demersal	Bathyal	Chordata	Actinopterygii	Lepidorhombus whiffiagonis	9.41	-18.71
Temperate	western Mediterranean	Pelagic	Mesopelagic	Chordata	Actinopterygii	Lobianchia dofleini	10.25	-20.23
Temperate	western Mediterranean	Pelagic	Mesopelagic	Chordata	Actinopterygii	Lobianchia dofleini	10.42	-19.58
Temperate	western Mediterranean	Pelagic	Mesopelagic	Chordata	Actinopterygii	Lobianchia dofleini	10.09	-20.03
Temperate	western Mediterranean	Pelagic	Mesopelagic	Mollusca	Cephalopoda	Loligo forbesii	9.53	-19.34
Temperate	western Mediterranean	Pelagic	Mesopelagic	Mollusca	Cephalopoda	Loligo forbesii	10.9	-18.76
Temperate	western Mediterranean	Demersal	Bathyal	Chordata	Actinopterygii	Lophius budegassa	10.95	-18.4
Temperate	western Mediterranean	Benthic	Bathyal	Arthropoda	Malacostraca	Lophogaster typicus	7.57	-19.65
Temperate	western Mediterranean	Benthic	Bathyal	Arthropoda	Malacostraca	Lophogaster typicus	4.65	-20.92
Temperate	western Mediterranean	Benthic	Bathyal	Annelida	Polychaeta	Lumbrinereis sp.	6.33	-18.32
Temperate	western Mediterranean	Benthic	Bathyal	Arthropoda	Malacostraca	Macropipus tuberculatus	9.29	-18.8
Temperate	western Mediterranean	Benthic	Bathyal	Annelida	Polychaeta	Maldanidae sp.	9.09	-16.17
Temperate	western Mediterranean	Pelagic	Mesopelagic	Chordata	Actinopterygii	Maurolicus muelleri	9	-20.16
Temperate	western Mediterranean	Pelagic	Mesopelagic	Chordata	Actinopterygii	Maurolicus muelleri	7.79	-19.66
Temperate	western Mediterranean	Pelagic	Mesopelagic	Chordata	Actinopterygii	Maurolicus muelleri	9.01	-19.3
Temperate	western Mediterranean	Pelagic	Mesopelagic	Chordata	Actinopterygii	Maurolicus muelleri	7.8	-19.67
Temperate	western Mediterranean	Benthic	Bathyal	Arthropoda	Malacostraca	Mediterexis mimonectes	6.41	-20.36
Temperate	western Mediterranean	Pelagic	Mesopelagic	Arthropoda	Malacostraca	Meganyctiphanes norvegica	6.45	-19.49
Temperate	western Mediterranean	Pelagic	Mesopelagic	Arthropoda	Malacostraca	Meganyctiphanes norvegica	6.91	-19.68
Temperate	western Mediterranean	Pelagic	Mesopelagic	Arthropoda	Malacostraca	Meganyctiphanes norvegica	6.24	-20.49
Temperate	western Mediterranean	Pelagic	Bathypelagic	Arthropoda	Malacostraca	Meganyctiphanes norvegica	5.19	-20.53
Temperate	western Mediterranean	Pelagic	Mesopelagic	Arthropoda	Malacostraca	Meganyctiphanes norvegica	6.57	-20.08
Temperate	western Mediterranean	Pelagic	Mesopelagic	Arthropoda	Malacostraca	Meganyctiphanes norvegica	6.34	-20.71
Temperate	western Mediterranean	Demersal	Bathyal	Chordata	Actinopterygii	Merluccius merluccius	9.49	-19.07
Temperate	western Mediterranean	Demersal	Bathyal	Chordata	Actinopterygii	Merluccius merluccius	10.92	-18.55
Temperate	western Mediterranean	Demersal	Bathyal	Chordata	Actinopterygii	Merluccius merluccius	11.89	-17.96
Temperate	western Mediterranean	Benthic	Bathyal	Echinodermata	Holothuroidea	Mesothuria intestinalis	9.63	-16.61
Temperate	western Mediterranean	Benthic	Bathyal	Echinodermata	Holothuroidea	Mesothuria intestinalis	9.84	-15.92
Temperate	western Mediterranean	Pelagic	Mesopelagic	Chordata	Actinopterygii	Micromesistius poutassou	9.91	-18.88
Temperate	western Mediterranean	Pelagic	Mesopelagic	Chordata	Actinopterygii	Micromesistius poutassou	9.47	-18.94
Temperate	western Mediterranean	Pelagic	Mesopelagic	Chordata	Actinopterygii	Micromesistius poutassou	10.63	-18.28
Temperate	western Mediterranean	Benthic	Bathyal	Echinodermata	Holothuroidea	Molpadia musculus	12.11	-16.88
Temperate	western Mediterranean	Benthic	Bathyal	Arthropoda	Malacostraca	Monodaeus couchii	8.54	-17.18
Temperate	western Mediterranean	Benthic	Bathyal	Arthropoda	Malacostraca	Monodaeus couchii	7.6	-15.6
Temperate	western Mediterranean	Benthic	Bathyal	Arthropoda	Malacostraca	Monodaeus couchii	7.57	-15.58
Temperate	western Mediterranean	Pelagic	Bathypelagic	Chordata	Actinopterygii	Mora moro	11.78	-17.27
Temperate	western Mediterranean	Pelagic	Mesopelagic	Chordata	Actinopterygii	Mora moro	8.9	-19.62
Temperate	western Mediterranean	Pelagic	Mesopelagic	Chordata	Actinopterygii	Mora moro	11.14	-18.25
Temperate	western Mediterranean	Benthic	Bathyal	Arthropoda	Malacostraca	Munida tenuimana	8.78	-18.25
Temperate	western Mediterranean	Benthic	Bathyal	Arthropoda	Malacostraca	Munida tenuimana	7.4	-15
Temperate	western Mediterranean	Benthic	Bathyal	Arthropoda	Malacostraca	Munida tenuimana	7.4	-15.6
Temperate	western Mediterranean	Benthic	Bathyal	Arthropoda	Malacostraca	Munida tenuimana	6.9	-15.1
Temperate	western Mediterranean	Benthic	Bathyal	Arthropoda	Malacostraca	Munida tenuimana	7.3	-14.3
Temperate	western Mediterranean	Benthic	Bathyal	Arthropoda	Malacostraca	Munida tenuimana	7.5	-14.6
Temperate	western Mediterranean	Benthic	Bathyal	Arthropoda	Malacostraca	Munnopsurus atlanticus	7.58	-21.07
Temperate	western Mediterranean	Benthic	Bathyal	Arthropoda	Malacostraca	Munnopsurus atlanticus	7.75	-20.38
Temperate	western Mediterranean	Pelagic	Mesopelagic	Chordata	Actinopterygii	Myctophum punctatum	7.66	-18.85
Temperate	western Mediterranean	Pelagic	Mesopelagic	Chordata	Actinopterygii	Myctophum punctatum	8.2	-20.27
Temperate	western Mediterranean	Pelagic	Mesopelagic	Chordata	Actinopterygii	Myctophum punctatum	7.67	-18.78
Temperate	western Mediterranean	Pelagic	Mesopelagic	Chordata	Actinopterygii	Myctophum punctatum	8.2	-19.9
Temperate	western Mediterranean	Pelagic	Mesopelagic	Chordata	Actinopterygii	Myctophum punctatum	6.6	-19.63
Temperate	western Mediterranean	Benthic	Bathyal	Arthropoda	Malacostraca	Mysideis parva	8.21	-19.78
Temperate	western Mediterranean	Benthic	Bathyal	Arthropoda	Malacostraca	Natatolana borealis	8.1	-19.8
Temperate	western Mediterranean	Demersal	Bathyal	Arthropoda	Malacostraca	Nematocarcinus exilis	9.7	-17.11
Temperate	western Mediterranean	Demersal	Bathyal	Arthropoda	Malacostraca	Nematocarcinus exilis	9.14	-17.1
Temperate	western Mediterranean	Demersal	Bathyal	Arthropoda	Malacostraca	Nematocarcinus Nexi exilis	7.2	-15.3
Temperate	western Mediterranean	Demersal	Bathyal	Arthropoda	Malacostraca	Nematocarcinus Nexi exilis	7.7	-14.9
Temperate	western Mediterranean	Pelagic	Mesopelagic	Arthropoda	Malacostraca	Nematoscelis megalops	6.29	-20
Temperate	western Mediterranean	Pelagic	Mesopelagic	Arthropoda	Malacostraca	Nematoscelis megalops	6.57	-20.19
Temperate	western Mediterranean	Pelagic	Mesopelagic	Arthropoda	Malacostraca	Nematoscelis megalops	7.6	-19.95
Temperate	western Mediterranean	Benthic	Bathyal	Nemertea		Nemertina sp.	7.62	-15.27
Temperate	western Mediterranean	Benthic	Bathyal	Annelida	Polychaeta	Neolanira tetragonal	8.81	-16.17
Temperate	western Mediterranean	Demersal	Bathyal	Mollusca	Cephalopoda	Neorossia caroli	9	-18.36
Temperate	western Mediterranean	Pelagic	Mesopelagic	Arthropoda	Malacostraca	Neoscolecithrix sp.	7.36	-20.48
Temperate	western Mediterranean	Benthic	Bathyal	Arthropoda	Malacostraca	Nephrops norvegicus	7.4	-16.9
Temperate	western Mediterranean	Benthic	Bathyal	Arthropoda	Malacostraca	Nephrops norvegicus	7.53	-17.19
Temperate	western Mediterranean	Benthic	Bathyal	Arthropoda	Malacostraca	Nephrops norvegicus	7	-16.1
Temperate	western Mediterranean	Benthic	Bathyal	Arthropoda	Malacostraca	Nephrops norvegicus	6.1	-16.6
Temperate	western Mediterranean	Benthic	Bathyal	Annelida	Polychaeta	Nephtys hombergi	8.61	-17.09
Temperate	western Mediterranean	Benthic	Bathyal	Annelida	Polychaeta	Nephtys hystricis	9.15	-16.89
Temperate	western Mediterranean	Benthic	Bathyal	Annelida	Polychaeta	Nephtys incise	9.81	-16.44
Temperate	western Mediterranean	Benthic	Bathyal	Annelida	Polychaeta	Nephtys paradoxa	8.38	-15.85
Temperate	western Mediterranean	Benthic	Bathyal	Annelida	Polychaeta	Nephtys sp.	8.98	-15.95
Temperate	western Mediterranean	Benthic	Bathyal	Chordata	Actinopterygii	Nettastoma melanurum	11.7	-18.45
Temperate	western Mediterranean	Demersal	Bathyal	Chordata	Actinopterygii	Nezumia aequalis	11.56	-18.43
Temperate	western Mediterranean	Demersal	Bathyal	Chordata	Actinopterygii	Nezumia aequalis	12.95	-17.72
Temperate	western Mediterranean	Demersal	Bathyal	Chordata	Actinopterygii	Nezumia sclerorhynchus	12.22	-16.54
Temperate	western Mediterranean	Benthic	Bathyal	Arthropoda	Malacostraca	Nicippe tumida	8.24	-20.28
Temperate	western Mediterranean	Benthic	Bathyal	Arthropoda	Malacostraca	Nicippe tumida	9.57	-19.65
Temperate	western Mediterranean	Pelagic	Mesopelagic	Chordata	Actinopterygii	Notolepis rissoi	7.94	-19.92
Temperate	western Mediterranean	Pelagic	Mesopelagic	Chordata	Actinopterygii	Notoscopelus elongatus	9.05	-21.05
Temperate	western Mediterranean	Pelagic	Mesopelagic	Chordata	Actinopterygii	Notoscopelus elongatus	8.92	-20.42
Temperate	western Mediterranean	Pelagic	Mesopelagic	Chordata	Actinopterygii	Notoscopelus elongatus	9.8	-19.07
Temperate	western Mediterranean	Pelagic	Mesopelagic	Chordata	Actinopterygii	Notoscopelus elongatus	8.51	-20.4
Temperate	western Mediterranean	Demersal	Bathyal	Mollusca	Cephalopoda	Octopus salutii	9.28	-18.77
Temperate	western Mediterranean	Benthic	Bathyal	Annelida	Polychaeta	Oenonidae sp.	10.33	-17.66
Temperate	western Mediterranean	Benthic	Bathyal	Mollusca	Cephalopoda	Opisthoteuthis calypso	9.11	-18.34
Temperate	western Mediterranean	Benthic	Bathyal	Mollusca	Cephalopoda	Opisthoteuthis calypso	7.67	-18.38
Temperate	western Mediterranean	Benthic	Bathyal	Mollusca	Cephalopoda	Opisthoteuthis calypso	8.8	-16.4
Temperate	western Mediterranean	Benthic	Bathyal	Mollusca	Cephalopoda	Opisthoteuthis calypso	6.6	-17.1
Temperate	western Mediterranean	Pelagic	Mesopelagic	Arthropoda	Ostracoda	Ostracoda sp.	3.19	-21.26
Temperate	western Mediterranean	Benthic	Bathyal	Arthropoda	Malacostraca	Pagurus alatus	7.1	-17.61
Temperate	western Mediterranean	Demersal	Bathyal	Arthropoda	Malacostraca	Pandalina profunda	7.98	-18.22
Temperate	western Mediterranean	Demersal	Bathyal	Arthropoda	Malacostraca	Pandalina profunda	8.08	-18.35
Temperate	western Mediterranean	Demersal	Bathyal	Arthropoda	Malacostraca	Parapenaeus longirostris	8.46	-18.25
Temperate	western Mediterranean	Benthic	Bathyal	Arthropoda	Malacostraca	Paromola cuvieri	9.7	-14.9
Temperate	western Mediterranean	Benthic	Bathyal	Arthropoda	Malacostraca	Paromola cuvieri	9.82	-15.07
Temperate	western Mediterranean	Demersal	Bathyal	Arthropoda	Malacostraca	Pasiphaea multidentata	7.65	-18.7
Temperate	western Mediterranean	Demersal	Bathyal	Arthropoda	Malacostraca	Pasiphaea multidentata	7.39	-18.82
Temperate	western Mediterranean	Demersal	Bathyal	Arthropoda	Malacostraca	Pasiphaea multidentata	7.97	-19.19
Temperate	western Mediterranean	Demersal	Bathyal	Arthropoda	Malacostraca	Pasiphaea multidentata	7	-18.4
Temperate	western Mediterranean	Demersal	Bathyal	Arthropoda	Malacostraca	Pasiphaea multidentata	7.02	-18.36
Temperate	western Mediterranean	Demersal	Bathyal	Arthropoda	Malacostraca	Pasiphaea multidentata	7.45	-19.97
Temperate	western Mediterranean	Demersal	Bathyal	Arthropoda	Malacostraca	Pasiphaea multidentata	7.4	-16.4
Temperate	western Mediterranean	Demersal	Bathyal	Arthropoda	Malacostraca	Pasiphaea multidentata	8.3	-16.4
Temperate	western Mediterranean	Demersal	Bathyal	Arthropoda	Malacostraca	Pasiphaea multidentata	8.1	-16.9
Temperate	western Mediterranean	Demersal	Bathyal	Arthropoda	Malacostraca	Pasiphaea multidentata	7.5	-16.6
Temperate	western Mediterranean	Demersal	Bathyal	Arthropoda	Malacostraca	Pasiphaea sivado	7.36	-19.85
Temperate	western Mediterranean	Pelagic	Bathypelagic	Cnidaria	Scyphozoa	Pelagia noctiluca	5.32	-19.14
Temperate	western Mediterranean	Pelagic	Mesopelagic	Cnidaria	Scyphozoa	Periphylla periphylla	6.49	-20.62
Temperate	western Mediterranean	Demersal	Bathyal	Arthropoda	Malacostraca	Philocheras echinulatus	9.049	-18.05
Temperate	western Mediterranean	Demersal	Bathyal	Arthropoda	Malacostraca	Philocheras echinulatus	11.8	-16.61
Temperate	western Mediterranean	Pelagic	Mesopelagic	Arthropoda	Malacostraca	Phronima sedentaria	6.68	-19.54
Temperate	western Mediterranean	Pelagic	Mesopelagic	Arthropoda	Malacostraca	Phronima sedentaria	6.26	-21.18
Temperate	western Mediterranean	Pelagic	Mesopelagic	Arthropoda	Malacostraca	Phronima sedentaria	5.81	-20.23
Temperate	western Mediterranean	Pelagic	Mesopelagic	Arthropoda	Malacostraca	Phrosina semilunata	5.68	-19.97
Temperate	western Mediterranean	Pelagic	Mesopelagic	Arthropoda	Malacostraca	Phrosina semilunata	5.94	-19.33
Temperate	western Mediterranean	Pelagic	Mesopelagic	Arthropoda	Malacostraca	Phrosina semilunata	3.96	-21.14
Temperate	western Mediterranean	Demersal	Bathyal	Chordata	Actinopterygii	Phycis blennoides	11.12	-18.84
Temperate	western Mediterranean	Demersal	Bathyal	Chordata	Actinopterygii	Phycis blennoides	11.57	-18.24
Temperate	western Mediterranean	Benthic	Bathyal	Arthropoda	Malacostraca	Platysimpus typicus	3.91	-18.95
Temperate	western Mediterranean	Demersal	Bathyal	Arthropoda	Malacostraca	Plesionika acanthonotus	7.78	-17.99
Temperate	western Mediterranean	Demersal	Bathyal	Arthropoda	Malacostraca	Plesionika acanthonotus	8.1	-15
Temperate	western Mediterranean	Demersal	Bathyal	Arthropoda	Malacostraca	Plesionika acanthonotus	7.1	-15.8
Temperate	western Mediterranean	Demersal	Bathyal	Arthropoda	Malacostraca	Plesionika acantonothus	7	-16.6
Temperate	western Mediterranean	Demersal	Bathyal	Arthropoda	Malacostraca	Plesionika antigai	7.71	-18.91
Temperate	western Mediterranean	Demersal	Bathyal	Arthropoda	Malacostraca	Plesionika heterocarpus	7.96	-18.46
Temperate	western Mediterranean	Demersal	Bathyal	Arthropoda	Malacostraca	Plesionika heterocarpus	7.49	-18.39
Temperate	western Mediterranean	Demersal	Bathyal	Arthropoda	Malacostraca	Plesionika martia	8.01	-18.47
Temperate	western Mediterranean	Demersal	Bathyal	Arthropoda	Malacostraca	Plesionika martia	7.78	-18.34
Temperate	western Mediterranean	Demersal	Bathyal	Arthropoda	Malacostraca	Plesionika martia	7.7	-16.9
Temperate	western Mediterranean	Demersal	Bathyal	Arthropoda	Malacostraca	Plesionika martia	6.7	-16.2
Temperate	western Mediterranean	Demersal	Bathyal	Arthropoda	Malacostraca	Plesionika martia	7	-15.9
Temperate	western Mediterranean	Benthic	Bathyal	Arthropoda	Malacostraca	Polycheles typhlops	8.7	-15.8
Temperate	western Mediterranean	Benthic	Bathyal	Arthropoda	Malacostraca	Polycheles typhlops	9	-15.9
Temperate	western Mediterranean	Benthic	Bathyal	Arthropoda	Malacostraca	Polycheles typhlops	9.6	-15.7
Temperate	western Mediterranean	Benthic	Bathyal	Annelida	Polychaeta	Polynoidae sp.	9.16	-17.69
Temperate	western Mediterranean	Demersal	Bathyal	Arthropoda	Malacostraca	Pontophilus norvegicus	9	-14.9
Temperate	western Mediterranean	Demersal	Bathyal	Arthropoda	Malacostraca	Pontophilus norvegicus	9.4	-13.5
Temperate	western Mediterranean	Demersal	Bathyal	Arthropoda	Malacostraca	Pontophilus norvegicus	9	-13.8
Temperate	western Mediterranean	Demersal	Bathyal	Arthropoda	Malacostraca	Pontophilus norvegicus	10.3	-13.8
Temperate	western Mediterranean	Demersal	Bathyal	Arthropoda	Malacostraca	Pontophilus norvegicus	10.5	-12.8
Temperate	western Mediterranean	Benthic	Bathyal	Arthropoda	Malacostraca	Procampylaspis armata	7.55	-19.05
Temperate	western Mediterranean	Demersal	Bathyal	Arthropoda	Malacostraca	Processa canaliculata	8.39	-18.9
Temperate	western Mediterranean	Demersal	Bathyal	Mollusca	Cephalopoda	Pteroctopus tetracirrhus	8.36	-18.28
Temperate	western Mediterranean	Demersal	Bathyal	Mollusca	Cephalopoda	Pteroctopus tetracirrhus	9.24	-17.87
Temperate	western Mediterranean	Pelagic	Mesopelagic	Chordata	Thaliacea	Pyrosoma atlanticum	3.24	-21.5
Temperate	western Mediterranean	Pelagic	Mesopelagic	Chordata	Thaliacea	Pyrosoma atlanticum	4.01	-21.75
Temperate	western Mediterranean	Pelagic	Mesopelagic	Chordata	Thaliacea	Pyrosoma atlanticum	3.45	-21.94
Temperate	western Mediterranean	Demersal	Bathyal	Chordata	Elasmobranchi	Raja clavata	9.43	-17.84
Temperate	western Mediterranean	Benthic	Bathyal	Arthropoda	Malacostraca	Rhachotropis caeca	9.11	-19.38
Temperate	western Mediterranean	Benthic	Bathyal	Arthropoda	Malacostraca	Rhachotropis caeca	10.8	-19.3
Temperate	western Mediterranean	Benthic	Bathyal	Arthropoda	Malacostraca	Rhachotropis grimaldi	8.78	-20.73
Temperate	western Mediterranean	Benthic	Bathyal	Arthropoda	Malacostraca	Rhachotropis grimaldii	9.06	-19.12
Temperate	western Mediterranean	Benthic	Bathyal	Arthropoda	Malacostraca	Rhachotropis integricauda	7.08	-19.97
Temperate	western Mediterranean	Benthic	Bathyal	Arthropoda	Malacostraca	Rhachotropis rostrata	9.24	-20.17
Temperate	western Mediterranean	Benthic	Bathyal	Arthropoda	Malacostraca	Rhachotropis rostrata	10.17	-19.83
Temperate	western Mediterranean	Demersal	Bathyal	Arthropoda	Malacostraca	Richardina sp.	11.29	-17.93
Temperate	western Mediterranean	Pelagic	Bathypelagic	Arthropoda	Malacostraca	Robustosergia robusta	7.16	-19.85
Temperate	western Mediterranean	Pelagic	Meso-Bathypelagic	Arthropoda	Malacostraca	Robustosergia robusta	6.4	-18.2
Temperate	western Mediterranean	Pelagic	Mesopelagic	Arthropoda	Malacostraca	Robustosergia robusta	6.57	-18.54
Temperate	western Mediterranean	Pelagic	Mesopelagic	Arthropoda	Malacostraca	Robustosergia robusta	6.05	-20.83
Temperate	western Mediterranean	Pelagic	Meso-Bathypelagic	Arthropoda	Malacostraca	Robustosergia robusta	7.3	-19.8
Temperate	western Mediterranean	Pelagic	Meso-Bathypelagic	Arthropoda	Malacostraca	Robustosergia robusta	6.7	-19.6
Temperate	western Mediterranean	Pelagic	Meso-Bathypelagic	Arthropoda	Malacostraca	Robustosergia robusta	6.2	-18.2
Temperate	western Mediterranean	Pelagic	Meso-Bathypelagic	Arthropoda	Malacostraca	Robustosergia robusta	6.6	-18.2
Temperate	western Mediterranean	Pelagic	Meso-Bathypelagic	Arthropoda	Malacostraca	Robustosergia robusta	7	-17
Temperate	western Mediterranean	Demersal	Bathyal	Mollusca	Cephalopoda	Rondeletiola minor	8.31	-19.54
Temperate	western Mediterranean	Demersal	Bathyal	Mollusca	Cephalopoda	Rossia macrosoma	8.27	-19.26
Temperate	western Mediterranean	Pelagic	Mesopelagic	Chordata	Thaliacea	Salpa maxima	3.59	-21.45
Temperate	western Mediterranean	Pelagic	Mesopelagic	Chordata	Thaliacea	Salpa maxima	4.09	-21.43
Temperate	western Mediterranean	Pelagic	Mesopelagic	Chordata	Thaliacea	Salpa maxima	2.56	-22.08
Temperate	western Mediterranean	Demersal	Bathyal	Mollusca	Cephalopoda	Scaeurgus unicirrhus	9.24	-19.91
Temperate	western Mediterranean	Benthic	Bathyal	Arthropoda	Hexanauplia	Scalpellum scalpellum	6.87	-19.15
Temperate	western Mediterranean	Benthic	Bathyal	Arthropoda	Malacostraca	Scopelocheirus hopei	8.2	-21.15
Temperate	western Mediterranean	Demersal	Bathyal	Mollusca	Cephalopoda	Sepietta oweniana	9.25	-19.73
Temperate	western Mediterranean	Benthic	Bathyal	Sipuncula	Sipunculidea	Sipunculus norvegicus	9.57	-14.51
Temperate	western Mediterranean	Benthic	Bathyal	Arthropoda	Malacostraca	Solenocera membranacea	8.38	-18.6
Temperate	western Mediterranean	Pelagic	Mesopelagic	Cnidaria	Scyphozoa	Solmissius sp.	6.29	-17.6
Temperate	western Mediterranean	Benthic	Bathyal	Arthropoda	Malacostraca	Stegocephaloides christianiensis	8.28	-20.84
Temperate	western Mediterranean	Benthic	Bathyal	Arthropoda	Malacostraca	Stegocephaloides christianiensis	6.26	-18.09
Temperate	western Mediterranean	Benthic	Bathyal	Arthropoda	Malacostraca	Stereomastis sculpta	10.94	-17.2
Temperate	western Mediterranean	Benthic	Bathyal	Arthropoda	Malacostraca	Stereomastis sculpta	10.47	-17.01
Temperate	western Mediterranean	Benthic	Bathyal	Arthropoda	Malacostraca	Stereomastis sculpta	9.6	-14.6
Temperate	western Mediterranean	Benthic	Bathyal	Arthropoda	Malacostraca	Stereomastis sculpta	9.2	-14.8
Temperate	western Mediterranean	Pelagic	Mesopelagic	Chordata	Actinopterygii	Stomias boa	9.11	-17.97
Temperate	western Mediterranean	Pelagic	Mesopelagic	Chordata	Actinopterygii	Stomias boa	9.23	-19.17
Temperate	western Mediterranean	Pelagic	Mesopelagic	Chordata	Actinopterygii	Stomias boa	8.53	-19.51
Temperate	western Mediterranean	Pelagic	Mesopelagic	Chordata	Actinopterygii	Stomias boa	9.18	-18.58
Temperate	western Mediterranean	Pelagic	Mesopelagic	Chordata	Actinopterygii	Stomias boa	8.53	-19.51
Temperate	western Mediterranean	Pelagic	Mesopelagic	Chordata	Actinopterygii	Stomias boa	9.18	-18.64
Temperate	western Mediterranean	Pelagic	Mesopelagic	Chordata	Actinopterygii	Symbolophorus veranyi	8.11	-20.02
Temperate	western Mediterranean	Pelagic	Mesopelagic	Chordata	Actinopterygii	Symbolophorus veranyi	8.1	-19.1
Temperate	western Mediterranean	Pelagic	Mesopelagic	Chordata	Actinopterygii	Symbolophorus veranyi	8.14	-20.2
Temperate	western Mediterranean	Pelagic	Mesopelagic	Chordata	Actinopterygii	Symbolophorus veranyi	7.52	-20.23
Temperate	western Mediterranean	Benthic	Bathyal	Arthropoda	Malacostraca	Syrrhoe affinis	6.64	-20.01
Temperate	western Mediterranean	Benthic	Bathyal	Arthropoda	Malacostraca	Syrrhoe affinis	6.41	-20.6
Temperate	western Mediterranean	Pelagic	Mesopelagic	Mollusca	Cephalopoda	Todarodes sagittatus	8.76	-19.17
Temperate	western Mediterranean	Pelagic	Mesopelagic	Mollusca	Cephalopoda	Todarodes sagittatus	9.58	-19.02
Temperate	western Mediterranean	Pelagic	Mesopelagic	Mollusca	Cephalopoda	Todarodes sagittatus	9.04	-19.5
Temperate	western Mediterranean	Pelagic	Mesopelagic	Annelida	Polychaeta	Tomopteris sp.	9.78	-19.5
Temperate	western Mediterranean	Pelagic	Mesopelagic	Chordata	Actinopterygii	Trachurus mediterraneus	8.01	-19.11
Temperate	western Mediterranean	Pelagic	Mesopelagic	Chordata	Actinopterygii	Trachurus trachurus	6.52	-19.75
Temperate	western Mediterranean	Demersal	Bathyal	Chordata	Actinopterygii	Trachyrhynchus scabrus	10.25	-16.86
Temperate	western Mediterranean	Benthic	Bathyal	Arthropoda	Malacostraca	Tryphosites alleni	6.56	-19.86
Temperate	western Mediterranean	Benthic	Bathyal	Arthropoda	Malacostraca	Tryphosites alleni	7.01	-18.06
Temperate	western Mediterranean	Benthic	Bathyal	Arthropoda	Malacostraca	Tryphosites longipes	5.76	-20.04
Temperate	western Mediterranean	Pelagic	Mesopelagic	Arthropoda	Malacostraca	Vibilia armata	2.53	-21.67
Temperate	western Mediterranean	Pelagic	Mesopelagic	Arthropoda	Malacostraca	Vibilia armata	4.16	-21.1
Temperate	western Mediterranean	Pelagic	Mesopelagic	Chordata	Actinopterygii	Vinciguerria attenuata	9.43	-19.23
Temperate	western Mediterranean	Pelagic	Mesopelagic	Chordata	Actinopterygii	Vinciguerria attenuata	7.76	-19.67
Temperate	western Mediterranean	Pelagic	Mesopelagic	Chordata	Actinopterygii	Vinciguerria attenuata	8.59	-19.45
Temperate	western Mediterranean	Benthic	Bathyal	Arthropoda	Malacostraca	Westwoodilla rectirostris	7.61	-18.94
Tropical	Arabian Sea	Benthic	Bathyal	Cnidaria	Anthozoa	Actinauge sp.	15.9	-15.4
Tropical	Arabian Sea	Benthic	Bathyal	Cnidaria	Anthozoa	Actinauge sp.	16.5	-15
Tropical	Arabian Sea	Benthic	Bathyal	Cnidaria	Anthozoa	Actinoscyphia sp.	15.9	-15.4
Tropical	Arabian Sea	Benthic	Bathyal	Cnidaria	Anthozoa	Actinoscyphia sp.	15.8	-16.1
Tropical	Arabian Sea	Benthic	Bathyal	Cnidaria	Anthozoa	Actinoscyphia sp.	15	-15.7
Tropical	Arabian Sea	Benthic	Bathyal	Cnidaria	Anthozoa	Actinoscyphia sp.	15.8	-15.4
Tropical	Arabian Sea	Benthic	Bathyal	Echinodermata	Ophiuroidea	Amphiura sp.	13.9	-16.4
Tropical	Arabian Sea	Benthic	Bathyal	Echinodermata	Ophiuroidea	Amphiura sp.	12.4	-15.8
Tropical	Arabian Sea	Benthic	Bathyal	Echinodermata	Asteroidea	Astropecten sp.	13.9	-16.8
Tropical	Arabian Sea	Benthic	Bathyal	Echinodermata	Asteroidea	Astropecten sp.	12	-16.5
Tropical	Arabian Sea	Benthic	Bathyal	Echinodermata	Echinoidea	Echinoptilum sp.	15	-19.1
Tropical	Arabian Sea	Benthic	Bathyal	Echinodermata	Echinoidea	Echinoptilum sp.	15.4	-18.3
Tropical	Arabian Sea	Benthic	Bathyal	Annelida	Polychaeta	Hyalinoecia sp.	14.1	-17.9
Tropical	Arabian Sea	Benthic	Bathyal	Annelida	Polychaeta	Hyalinoecia sp.	13.8	-17.3
Tropical	Arabian Sea	Benthic	Bathyal	Arthropoda	Malacostraca	Munidopsis aff scobina	15.1	-17
Tropical	Arabian Sea	Benthic	Bathyal	Arthropoda	Malacostraca	Munidopsis aff scobina	15.7	-18.1
Tropical	Arabian Sea	Benthic	Bathyal	Echinodermata	Ophiuroidea	Ophiura euryplax	12.1	-18.8
Tropical	Arabian Sea	Benthic	Bathyal	Echinodermata	Ophiuroidea	Ophiura euryplax	9.7	-19.6
Tropical	Arabian Sea	Benthic	Bathyal	Cnidaria	Anthozoa	Pennatula aff. grandis	15.7	-16.5
Tropical	Arabian Sea	Benthic	Bathyal	Cnidaria	Anthozoa	Pennatula aff. grandis	15.9	-17.4
Tropical	Arabian Sea	Benthic	Bathyal	Echinodermata	Echinoidea	Phormosoma placenta	13.5	-17.6
Tropical	Arabian Sea	Benthic	Bathyal	Echinodermata	Echinoidea	Phormosoma placenta	12.4	-18.5
Tropical	Arabian Sea	Benthic	Bathyal	Arthropoda	Malacostraca	Pontocaris sp.	15	-15.3
Tropical	Arabian Sea	Benthic	Bathyal	Arthropoda	Malacostraca	Solenocera sp.	14	-17
Tropical	Arabian Sea	Benthic	Bathyal	Arthropoda	Malacostraca	Solenocera sp.	13.2	-16.6
Tropical	Arabian Sea	Benthic	Bathyal	Arthropoda	Malacostraca	Solenocera sp.	13.8	-17.1
Tropical	Exuma Sound, Bahamas	Demersal	Bathyal	Chordata	Elasmobranchi	Centrophorus spp.	10.6	-16.1
Tropical	Exuma Sound, Bahamas	Demersal	Bathyal	Chordata	Elasmobranchi	Heptranchias perlo	12.4	-16.1
Tropical	Exuma Sound, Bahamas	Demersal	Bathyal	Chordata	Elasmobranchi	Heptranchias perlo	13.2	-16.9
Tropical	Exuma Sound, Bahamas	Demersal	Bathyal	Chordata	Elasmobranchi	Hexanchus nakamurai	11.2	-13.8
Tropical	Exuma Sound, Bahamas	Demersal	Bathyal	Chordata	Elasmobranchi	Mustelus canis-insularis	9.3	-11.5
Tropical	Exuma Sound, Bahamas	Demersal	Bathyal	Chordata	Elasmobranchi	Scyliorhinus meadi	8	-14.1
Tropical	Exuma Sound, Bahamas	Demersal	Bathyal	Chordata	Elasmobranchi	Squalus cubensis	10	-14
