# Supplementary material for: Reviews and syntheses: Insights into deep-sea food webs and global environmental gradients revealed by stable isotopes (δ 15 N, δ 13 C) and fatty acids trophic biomarkers
Source: Copernicus journal article supplement (doi:10.5194/bg-2019-80), 2019-03-12
Supplement: Supplementary file 2 [file Table S2.xlsx]

## Sheet: FA dataset
Table S2. Dataset applied to analyze trends in the FA composition of deep-sea animals. The FA 20:4ω6, 20:5ω3, and 22:6ω3 are expressed as proportions (%). Data were collected from Pétursdóttir et al. (2008a, 2008b), Würzberg et al. (2011a, 2011b, 2011c) for the polar latitudes; Lewis (1967), Howell et al. (2003), Hudson et al. (2004), Økland et al. (2005), Drazen et al. (2008a, 2008b), Stowasser …
Latitude	Ocean/Ocean region	Habitat	Collection depth	Phylum	Class	Species	20:4ω6	20:5ω3	22:6ω3
Polar	Northeast Atlantic	Benthic	Bathyal	Cnidaria	Anthozoa	Desmophyllum pertusum	14.2004	0.361991	1.18874
Polar	Northeast Atlantic	Benthic	Bathyal	Cnidaria	Anthozoa	Desmophyllum pertusum	7.22923	0.347227	0.968274
Polar	Northeast Atlantic	Benthic	Bathyal	Cnidaria	Anthozoa	Desmophyllum pertusum	12.4814	0.280972	0.889757
Polar	Northeast Atlantic	Benthic	Bathyal	Cnidaria	Anthozoa	Desmophyllum pertusum	14.3947	0.365471	0.983692
Polar	Northeast Atlantic	Benthic	Bathyal	Echinodermata	Asteroidea	Henricia pertusa	2.20441	1.02216	0.583809
Polar	Northeast Atlantic	Benthic	Bathyal	Echinodermata	Asteroidea	Henricia pertusa	5.63942	0.636591	0.527105
Polar	Northeast Atlantic	Benthic	Bathyal	Echinodermata	Asteroidea	Henricia pertusa	15.0079	1.35376	0.453214
Polar	Northeast Atlantic	Benthic	Bathyal	Porifera	Demospongiae	mix of large sponges	0.380484	0.143738	1.84913
Polar	Northeast Atlantic	Benthic	Bathyal	Porifera	Demospongiae	mix of large sponges	1.58364	2.72014	3.44303
Polar	Northeast Atlantic	Benthic	Bathyal	Porifera	Demospongiae	mix of large sponges	1.7189	0	3.13473
Polar	Northeast Atlantic	Benthic	Bathyal	Porifera	Demospongiae	mix of large sponges	0	3.80171	28.0441
Polar	Northeast Atlantic	Benthic	Bathyal	Porifera	Demospongiae	mix of large sponges	0	2.25673	5.78071
Polar	Northeast Atlantic	Benthic	Bathyal	Porifera	Demospongiae	mix of large sponges	0.35368	4.36924	1.63747
Polar	Northeast Atlantic	Benthic	Bathyal	Porifera	Demospongiae	mix of large sponges	0.408426	4.78099	1.75542
Polar	Northeast Atlantic	Benthic	Bathyal	Porifera	Demospongiae	mix of large sponges	0	0.17925	0.610812
Polar	Northeast Atlantic	Benthic	Bathyal	Porifera	Demospongiae	mix of large sponges	0	0	0.38971
Polar	Northeast Atlantic	Benthic	Bathyal	Porifera	Demospongiae	mix of large sponges	0	0	0.609825
Polar	Northeast Atlantic	Benthic	Bathyal	Porifera	Demospongiae	mix of large sponges	2.04481	7.98612	2.70404
Polar	Northeast Atlantic	Benthic	Bathyal	Porifera	Demospongiae	mix of large sponges	1.57225	1.64024	11.5658
Polar	Northeast Atlantic	Benthic	Bathyal	Porifera	Demospongiae	mix of large sponges	1.51687	1.92255	12.8609
Polar	Northeast Atlantic	Benthic	Bathyal	Porifera	Demospongiae	mix of large sponges	1.43456	1.51628	11.8729
Polar	Northeast Atlantic	Benthic	Bathyal	Porifera	Demospongiae	mix of large sponges	0	0	0.560747
Polar	Northeast Atlantic	Benthic	Bathyal	Porifera	Demospongiae	mix of large sponges	0	0	0
Polar	Northeast Atlantic	Benthic	Bathyal	Porifera	Demospongiae	mix of large sponges	1.7288	4.38493	2.74751
Polar	Northeast Atlantic	Benthic	Bathyal	Echinodermata	Holothuroidea	Parastichopus tremulus	11.0422	3.42028	3.91118
Polar	Weddell Sea	Benthic	Bathyal-Abyssal	Arthropoda	Malacostraca	Abyssorchomene spp.	1	11	7
Polar	Weddell Sea	Benthic	Bathyal-Abyssal	Arthropoda	Malacostraca	Abyssorchomene spp.	2	11	11
Polar	Weddell Sea	Benthic	Bathyal-Abyssal	Arthropoda	Malacostraca	Apseudes sp.	9	15	9
Polar	Weddell Sea	Benthic	Bathyal-Abyssal	Arthropoda	Malacostraca	Apseudomorpha sp.	4	8	7
Polar	Weddell Sea	Benthic	Bathyal-Abyssal	Arthropoda	Malacostraca	Betamorpha sp.	19	17	16
Polar	Weddell Sea	Benthic	Bathyal-Abyssal	Arthropoda	Malacostraca	Bodotriidae spp.	6	29	7
Polar	Weddell Sea	Benthic	Bathyal-Abyssal	Arthropoda	Malacostraca	Chaetarcturus cf. bovinus	6	26	12
Polar	Weddell Sea	Benthic	Bathyal-Abyssal	Arthropoda	Malacostraca	Chaulioniscus sp.	4	13	11
Polar	Weddell Sea	Benthic	Bathyal-Abyssal	Arthropoda	Malacostraca	Diastylidae sp.	4	24	4
Polar	Weddell Sea	Benthic	Bathyal-Abyssal	Arthropoda	Malacostraca	Eudorella sp.	3	28	11
Polar	Weddell Sea	Benthic	Bathyal-Abyssal	Arthropoda	Malacostraca	Eurycope sp.	10	17	15
Polar	Weddell Sea	Benthic	Bathyal-Abyssal	Arthropoda	Malacostraca	Eurythenes gryllus	3	14	17
Polar	Weddell Sea	Benthic	Bathyal-Abyssal	Arthropoda	Malacostraca	Haploniscus sp.	3	24	40
Polar	Weddell Sea	Benthic	Bathyal-Abyssal	Arthropoda	Malacostraca	Ilyarachna sp.	12	18	13
Polar	Weddell Sea	Benthic	Bathyal-Abyssal	Arthropoda	Malacostraca	Ischnomesus sp.	5	18	25
Polar	Weddell Sea	Benthic	Bathyal-Abyssal	Arthropoda	Malacostraca	Leuconidae sp 1	3	30	16
Polar	Weddell Sea	Benthic	Bathyal-Abyssal	Arthropoda	Malacostraca	Leuconidae sp 2	6	21	10
Polar	Weddell Sea	Benthic	Bathyal-Abyssal	Arthropoda	Malacostraca	Lysianassidae sp.	9	14	24
Polar	Weddell Sea	Benthic	Bathyal-Abyssal	Arthropoda	Malacostraca	Macrostylis sp 1	10	14	13
Polar	Weddell Sea	Benthic	Bathyal-Abyssal	Arthropoda	Malacostraca	Macrostylis sp 2	4	10	7
Polar	Weddell Sea	Benthic	Bathyal-Abyssal	Arthropoda	Malacostraca	Mastigoniscus sp.	5	15	13
Polar	Weddell Sea	Benthic	Bathyal-Abyssal	Arthropoda	Malacostraca	Nannastacidae sp.	2	19	3
Polar	Weddell Sea	Benthic	Bathyal-Abyssal	Arthropoda	Malacostraca	Neotanais sp.	16	15	7
Polar	Weddell Sea	Benthic	Bathyal-Abyssal	Arthropoda	Malacostraca	Notoxenus cf. spinifer	8	23	14
Polar	Weddell Sea	Benthic	Bathyal-Abyssal	Arthropoda	Malacostraca	Paranarthrura sp.	19	5	8
Polar	Weddell Sea	Benthic	Bathyal-Abyssal	Arthropoda	Malacostraca	Stenetrium weddellensis	4	17	10
Polar	Weddell Sea	Benthic	Bathyal-Abyssal	Arthropoda	Malacostraca	Syneurycope sp 1	6	19	16
Polar	Weddell Sea	Benthic	Bathyal-Abyssal	Arthropoda	Malacostraca	Syneurycope sp 2	8	18	20
Polar	Northeast Atlantic	Benthic	Bathyal	Echinodermata	Ophiuroidea	Ophiopholis aculeata	1.47728	9.44085	4.93034
Polar	Northeast Atlantic	Benthic	Bathyal	Echinodermata	Ophiuroidea	Ophiopholis aculeata	2.47734	7.55558	2.20661
Polar	Northeast Atlantic	Benthic	Bathyal	Echinodermata	Ophiuroidea	Ophiopholis aculeata	1.07823	7.22324	1.42442
Polar	Northeast Atlantic	Benthic	Bathyal	Echinodermata	Ophiuroidea	Ophiopholis aculeata	3.28088	0	1.11577
Polar	Weddell Sea	Benthic	Bathyal-Abyssal	Annelida	Polychaeta	Acrocirridae sp.	4	29	4
Polar	Weddell Sea	Benthic	Bathyal-Abyssal	Annelida	Polychaeta	Aglaophamus sp.	4	20	20
Polar	Weddell Sea	Benthic	Bathyal-Abyssal	Annelida	Polychaeta	Ammotrypanella cf. arctica	4	29	12
Polar	Weddell Sea	Benthic	Bathyal-Abyssal	Annelida	Polychaeta	Axiokebuita millsii	5	17	1
Polar	Weddell Sea	Benthic	Bathyal-Abyssal	Annelida	Polychaeta	Bathyglycinde sp.	1	13	7
Polar	Weddell Sea	Benthic	Bathyal-Abyssal	Annelida	Polychaeta	Brania rhopalophora	5	14	14
Polar	Weddell Sea	Benthic	Bathyal-Abyssal	Annelida	Polychaeta	Capitellidae sp.	5	33	2
Polar	Weddell Sea	Benthic	Bathyal-Abyssal	Annelida	Polychaeta	cf. Ophelina sp.	4	30	5
Polar	Weddell Sea	Benthic	Bathyal-Abyssal	Annelida	Polychaeta	Euphrosinidae sp.	20	17	5
Polar	Weddell Sea	Benthic	Bathyal-Abyssal	Annelida	Polychaeta	Eupistella grubei	1	14	11
Polar	Weddell Sea	Benthic	Bathyal-Abyssal	Annelida	Polychaeta	Eusyllis kerguelensis	9	28	13
Polar	Weddell Sea	Benthic	Bathyal-Abyssal	Annelida	Polychaeta	Eusyllis kerguelensis	10	23	14
Polar	Weddell Sea	Benthic	Bathyal-Abyssal	Annelida	Polychaeta	Fauveliopsidae sp.	5	15	11
Polar	Weddell Sea	Benthic	Bathyal-Abyssal	Annelida	Polychaeta	Flabelligeridae sp.	1	26	17
Polar	Weddell Sea	Benthic	Bathyal-Abyssal	Annelida	Polychaeta	Flabelligeridae sp.	2	3	5
Polar	Weddell Sea	Benthic	Bathyal-Abyssal	Annelida	Polychaeta	Kesun abyssorum	3	9	3
Polar	Weddell Sea	Benthic	Bathyal-Abyssal	Annelida	Polychaeta	Kesun abyssorum	11	15	5
Polar	Weddell Sea	Benthic	Bathyal-Abyssal	Annelida	Polychaeta	Maldanidae sp.	8	12	13
Polar	Weddell Sea	Benthic	Bathyal-Abyssal	Annelida	Polychaeta	Nephtyidae sp.	25	12	3
Polar	Weddell Sea	Benthic	Bathyal-Abyssal	Annelida	Polychaeta	Nephtyidae sp.	24	14	1
Polar	Weddell Sea	Benthic	Bathyal-Abyssal	Annelida	Polychaeta	Ophelina breviata	4	26	6
Polar	Weddell Sea	Benthic	Bathyal-Abyssal	Annelida	Polychaeta	Ophelina breviata	11	10	6
Polar	Weddell Sea	Benthic	Bathyal-Abyssal	Annelida	Polychaeta	Orbiniidae sp.	3	23	19
Polar	Weddell Sea	Benthic	Bathyal-Abyssal	Annelida	Polychaeta	Phyllodocidae sp.	2	27	20
Polar	Weddell Sea	Benthic	Bathyal-Abyssal	Annelida	Polychaeta	Pionosyllis epipharynx	7	25	13
Polar	Weddell Sea	Benthic	Bathyal-Abyssal	Annelida	Polychaeta	Polynoidae sp.	4	17	23
Polar	Weddell Sea	Benthic	Bathyal-Abyssal	Annelida	Polychaeta	Polynoidae sp.	3	19	22
Polar	Weddell Sea	Benthic	Bathyal-Abyssal	Annelida	Polychaeta	Polyodontidae sp.	4	16	20
Polar	Weddell Sea	Benthic	Bathyal-Abyssal	Annelida	Polychaeta	Polyodontidae sp.	3	14	17
Polar	Weddell Sea	Benthic	Bathyal-Abyssal	Annelida	Polychaeta	Scalibregmatidae sp.	6	16	3
Polar	Weddell Sea	Benthic	Bathyal-Abyssal	Annelida	Polychaeta	Sigalionidae sp.	2	19	21
Polar	Weddell Sea	Benthic	Bathyal-Abyssal	Annelida	Polychaeta	Spionidae sp.	2	26	11
Polar	Weddell Sea	Benthic	Bathyal-Abyssal	Annelida	Polychaeta	Spionidae sp.	3	21	13
Polar	Weddell Sea	Benthic	Bathyal-Abyssal	Annelida	Polychaeta	Spionidae sp.	9	39	3
Polar	Weddell Sea	Benthic	Bathyal-Abyssal	Annelida	Polychaeta	Travisia kerguelensis	12	11	3
Polar	Weddell Sea	Benthic	Bathyal-Abyssal	Annelida	Polychaeta	Travisia kerguelensis	11	10	3
Polar	Weddell Sea	Benthic	Bathyal-Abyssal	Annelida	Polychaeta	Travisia kerguelensis	3	20	7
Polar	Weddell Sea	Benthic	Bathyal-Abyssal	Annelida	Polychaeta	Trypanosyllis gigantea	4	21	17
Polar	Weddell Sea	Benthic	Bathyal-Abyssal	Annelida	Polychaeta	Trypanosyllis gigantea	9	22	1
Polar	Northeast Atlantic	Benthic	Bathyal	Chordata	Tunicata	Ascidia sp.	22.3068	0	17.6326
Polar	Northeast Atlantic	Benthic	Bathyal	Chordata	Tunicata	Ascidia sp.	16.6138	8.75193	14.1534
Polar	Northeast Atlantic	Benthic	Bathyal	Chordata	Tunicata	Ascidia sp.	4.00707	3.48816	5.70377
Polar	Northeast Atlantic	Benthic	Bathyal	Brachiopoda		Brachiopoda sp.	3.82597	5.03044	13.7337
Polar	Northeast Atlantic	Benthic	Bathyal	Brachiopoda		Brachiopoda sp.	2.47079	3.99497	8.6209
Polar	Northeast Atlantic	Benthic	Bathyal	Brachiopoda		Brachiopoda sp.	6.4678	2.75306	9.86699
Polar	Northeast Atlantic	Demersal	Bathyal	Chordata	Actinopterygii	Argentina sphyraena	1.1063	4.30375	21.9866
Polar	Northeast Atlantic	Demersal	Bathyal	Chordata	Actinopterygii	Argentina sphyraena	1.23527	4.99167	37.9038
Polar	Northeast Atlantic	Demersal	Bathyal	Chordata	Actinopterygii	Artediellus atlanticus	5.87298	6.3542	19.1882
Polar	Northeast Atlantic	Demersal	Bathyal	Chordata	Actinopterygii	Artediellus atlanticus	6.8367	11.6522	43.2989
Polar	Northeast Atlantic	Demersal	Bathyal	Chordata	Actinopterygii	Artediellus atlanticus	5.17695	6.03499	14.9169
Polar	Northeast Atlantic	Demersal	Bathyal	Chordata	Actinopterygii	Brosme brosme	2.1499	0	6.50764
Polar	Northeast Atlantic	Demersal	Bathyal	Chordata	Actinopterygii	Brosme brosme	3.65113	0	16.5072
Polar	Northeast Atlantic	Demersal	Bathyal	Chordata	Actinopterygii	Brosme brosme	3.57101	0.0562244	13.489
Polar	Northeast Atlantic	Demersal	Bathyal	Chordata	Actinopterygii	Brosme brosme	2.67182	0	8.62856
Polar	Northeast Atlantic	Demersal	Bathyal	Chordata	Actinopterygii	Brosme brosme	4.9653	0.0554432	12.4343
Polar	Northeast Atlantic	Demersal	Bathyal	Chordata	Actinopterygii	Brosme brosme	3.26268	0	6.99338
Polar	Northeast Atlantic	Demersal	Bathyal	Chordata	Actinopterygii	Brosme brosme	2.7577	0	11.7657
Polar	Northeast Atlantic	Demersal	Bathyal	Chordata	Actinopterygii	Brosme brosme	3.29374	0	16.064
Polar	Northeast Atlantic	Demersal	Bathyal	Chordata	Actinopterygii	Brosme brosme	3.61014	0	18.6835
Polar	Northeast Atlantic	Demersal	Bathyal	Chordata	Actinopterygii	Brosme brosme	3.94778	0.0468973	11.1256
Polar	Northeast Atlantic	Demersal	Bathyal	Chordata	Actinopterygii	Brosme brosme	3.33011	0	20.2119
Polar	Northeast Atlantic	Demersal	Bathyal	Chordata	Actinopterygii	Brosme brosme	2.85913	0.164781	13.3749
Polar	Northeast Atlantic	Demersal	Bathyal	Chordata	Actinopterygii	Chimaera monstrosa	4.06617	5.89111	36.2934
Polar	Northeast Atlantic	Demersal	Bathyal	Chordata	Actinopterygii	Chimaera monstrosa	4.53572	6.68321	33.5781
Polar	Northeast Atlantic	Demersal	Bathyal	Chordata	Actinopterygii	Hippoglossoides platessoides	8.49043	14.0577	32.9231
Polar	Northeast Atlantic	Demersal	Bathyal	Chordata	Actinopterygii	Hippoglossoides platessoides	7.88528	9.6977	18.4874
Polar	Northeast Atlantic	Demersal	Bathyal	Chordata	Actinopterygii	Hippoglossoides platessoides	7.04984	13.483	37.577
Polar	Northeast Atlantic	Demersal	Bathyal	Chordata	Actinopterygii	Phycis blennoides	8.90908	0	28.7917
Polar	Northeast Atlantic	Demersal	Bathyal	Chordata	Actinopterygii	Phycis blennoides	4.16845	9.54668	34.0048
Polar	Northeast Atlantic	Demersal	Bathyal	Chordata	Actinopterygii	Pollachius virens	2.45726	0.752033	0
Polar	Northeast Atlantic	Demersal	Bathyal	Chordata	Actinopterygii	Pollachius virens	2.71512	1.39797	2.47059
Polar	North Atlantic	Demersal	Bathyal	Chordata	Actinopterygii	Sebastes mentella	2.5	9.4	23.2
Polar	North Atlantic	Demersal	Bathyal	Chordata	Actinopterygii	Sebastes mentella	2.2	8.4	23.2
Polar	Northeast Atlantic	Demersal	Bathyal	Chordata	Actinopterygii	Sebastes viviparus	1.14243	9.17955	0
Polar	Northeast Atlantic	Demersal	Bathyal	Chordata	Actinopterygii	Sebastes viviparus	2.00677	7.24331	37.928
Polar	Northeast Atlantic	Demersal	Bathyal	Chordata	Actinopterygii	Sebastes viviparus	2.33905	7.39797	34.6772
Polar	Northeast Atlantic	Demersal	Bathyal	Chordata	Actinopterygii	Trisopterus esmarkii	1.47941	7.66825	34.7128
Polar	Northeast Atlantic	Demersal	Bathyal	Chordata	Actinopterygii	Trisopterus esmarkii	0.794183	8.7036	37.271
Polar	Weddell Sea	Demersal	Bathyal	Chordata	Actinopterygii	Artedidraco orianae	6	16.7	18.5
Polar	Weddell Sea	Demersal	Bathyal	Chordata	Actinopterygii	Bathydraco antarcticus	3.6	17.5	26.4
Polar	Weddell Sea	Demersal	Bathyal	Chordata	Actinopterygii	Bathydraco sp.	4.1	16.7	30.3
Polar	Weddell Sea	Demersal	Bathyal	Chordata	Actinopterygii	Chionodraco myersi	0	10	8.7
Polar	Weddell Sea	Demersal	Bathyal	Chordata	Actinopterygii	Cryodraco antarcticus	1.9	13.1	19
Polar	Weddell Sea	Demersal	Bathyal	Chordata	Actinopterygii	Cryodraco antarcticus	2.7	17	21.9
Polar	Weddell Sea	Demersal	Bathyal	Chordata	Actinopterygii	Macrouridae spp.	3.6	14.2	35.3
Polar	Weddell Sea	Demersal	Bathyal	Chordata	Actinopterygii	Macrouridae spp. juv	3.7	12.4	35.4
Polar	Weddell Sea	Demersal	Bathyal	Chordata	Actinopterygii	Macrouridae spp. juv	4.3	19.9	22
Polar	Weddell Sea	Demersal	Bathyal	Chordata	Actinopterygii	Trematotus bernachii	4	18.4	21
Polar	Weddell Sea	Demersal	Bathyal	Chordata	Actinopterygii	Trematotus bernachii juv	3.1	21.5	21.3
Polar	Weddell Sea	Demersal	Bathyal	Chordata	Actinopterygii	Trematotus bernachii juv	3.3	18.3	22.9
Polar	Weddell Sea	Demersal	Bathyal	Chordata	Actinopterygii	Trematotus scotti	5	19.1	22.7
Polar	Weddell Sea	Demersal	Bathyal	Chordata	Actinopterygii	Trematotus scotti juv	12.2	17.4	18.4
Polar	Northeast Atlantic	Demersal	Bathyal	Arthropoda	Hexanauplia	Calanus sp.	0.321802	2.99861	11.354
Polar	Northeast Atlantic	Demersal	Bathyal	Arthropoda	Hexanauplia	Calanus sp.	0.249175	2.07716	14.2542
Polar	Northeast Atlantic	Demersal	Bathyal	Arthropoda	Hexanauplia	Calanus sp.	0.173344	0.496419	12.6239
Polar	Northeast Atlantic	Demersal	Bathyal	Arthropoda	Hexanauplia	Calanus sp.	0.256475	2.0886	13.9364
Polar	Northeast Atlantic	Benthic	Bathyal	Arthropoda	Malacostraca	Lithodes maja	6.27224	7.05925	5.43722
Polar	Northeast Atlantic	Demersal	Bathyal	Arthropoda	Malacostraca	Munida rugosa	2.17085	17.4193	17.8008
Polar	Northeast Atlantic	Demersal	Bathyal	Arthropoda	Malacostraca	Munida rugosa	2.13095	18.0169	17.6133
Polar	North Atlantic	Pelagic	Meso-Bathypelagic	Chordata	Actinopterygii	Benthosema glaciale	0.8	12	5.7
Polar	North Atlantic	Pelagic	Meso-Bathypelagic	Chordata	Actinopterygii	Benthosema glaciale	0.2	1	0.9
Polar	North Atlantic	Pelagic	Meso-Bathypelagic	Chordata	Actinopterygii	Maurolicus muelleri	0.5	8.5	3.7
Polar	Northeast Atlantic	Pelagic	Mesopelagic	Chordata	Actinopterygii	Maurolicus muelleri	0.250493	30.4967	4.49932
Polar	Northeast Atlantic	Pelagic	Mesopelagic	Chordata	Actinopterygii	Maurolicus muelleri	0.168537	29.3988	5.00784
Polar	Northeast Atlantic	Pelagic	Mesopelagic	Chordata	Actinopterygii	Maurolicus muelleri	0.171344	28.3649	3.96927
Polar	Northeast Atlantic	Benthic	Bathyal	Mollusca	Cephalopoda	Sepiola atlantica	1.29096	17.0754	35.505
Polar	Northeast Atlantic	Benthic	Bathyal	Mollusca	Cephalopoda	Sepiola atlantica	2.2599	14.5066	34.0427
Polar	North Atlantic	Pelagic	Meso-Bathypelagic	Arthropoda	Hexanauplia	Calanus finmarchicus	1.1	11.4	1.2
Polar	Northeast Atlantic	Pelagic	Mesopelagic	Arthropoda	Malacostraca	Meganyctiphanes norvegica	1.0486	7.78532	23.1545
Polar	Northeast Atlantic	Pelagic	Mesopelagic	Arthropoda	Malacostraca	Meganyctiphanes norvegica	0.866555	9.3252	29.6619
Polar	Northeast Atlantic	Pelagic	Mesopelagic	Arthropoda	Malacostraca	Meganyctiphanes norvegica	0.696487	5.10521	23.8829
Polar	Northeast Atlantic	Pelagic	Mesopelagic	Arthropoda	Malacostraca	Pandalus borealis	2.5167	12.9958	21.5342
Polar	Northeast Atlantic	Pelagic	Mesopelagic	Arthropoda	Malacostraca	Pandalus borealis	3.68571	13.7955	18.1907
Polar	Northeast Atlantic	Pelagic	Mesopelagic	Arthropoda	Malacostraca	Pandalus borealis	0	11.8896	14.8921
Polar	Northeast Atlantic	Pelagic	Mesopelagic	Arthropoda	Malacostraca	Pandalus borealis	0	13.3607	14.9945
Polar	Northeast Atlantic	Pelagic	Mesopelagic	Arthropoda	Malacostraca	Pandalus borealis	2.29929	15.231	15.6004
Polar	Northeast Atlantic	Pelagic	Mesopelagic	Arthropoda	Malacostraca	Pandalus borealis	0	12.4105	14.789
Polar	Northeast Atlantic	Pelagic	Mesopelagic	Arthropoda	Malacostraca	Thysanoessa inermis	0.341519	15.264	6.26617
Polar	Northeast Atlantic	Pelagic	Mesopelagic	Arthropoda	Malacostraca	Thysanoessa inermis	0	18.5562	31.0924
Temperate	Northwest Atlantic	Benthic	Bathyal	Cnidaria	Anthozoa	Actinauge cristata	0	8	5
Temperate	Northeast Atlantic	Benthic	Bathyal	Cnidaria	Anthozoa	Actinauge sp.	1.52884	13.9521	10.9569
Temperate	Northwest Atlantic	Benthic	Bathyal	Cnidaria	Anthozoa	Actinoscyphia aurelia	8	16	1
Temperate	Northwest Atlantic	Benthic	Bathyal	Cnidaria	Anthozoa	Actinostola callosa	0	13	5
Temperate	Northeast Atlantic	Benthic	Bathyal	Cnidaria	Anthozoa	Anthomastus sp.	22.1646	3.76862	1.77061
Temperate	Northeast Atlantic	Benthic	Bathyal	Cnidaria	Anthozoa	Anthomastus sp.	18.445	6.9625	3.26667
Temperate	Northeast Atlantic	Benthic	Bathyal	Cnidaria	Anthozoa	Anthomastus sp.	11.6828	11.4954	6.08677
Temperate	Northeast Atlantic	Benthic	Bathyal	Cnidaria	Anthozoa	Anthomastus sp.	36.9248	0	4.64071
Temperate	Northwest Atlantic	Benthic	Bathyal	Cnidaria	Anthozoa	Anthomastus spp	13	9	2
Temperate	Northwest Atlantic	Benthic	Bathyal	Cnidaria	Anthozoa	Anthoptilum grandiflorum	3	21	3
Temperate	Northwest Atlantic	Benthic	Bathyal	Cnidaria	Anthozoa	Average value gorgonians (Acanthogorgia armata, Keratoisis grayi, Acanella arbuscula, Radicipes gracilis, Paramuricea spp.)	16	8	4
Temperate	Northwest Atlantic	Benthic	Bathyal	Cnidaria	Anthozoa	Average value sea pens (Pennatula sp., Funiculina quadrangularis, Pennatula grandis, Anthoptilum grandiflorum, Distichoptilum gracile, Halipteris finmarchica)	5	17	3
Temperate	Northwest Atlantic	Benthic	Bathyal	Cnidaria	Anthozoa	Average value soft corals (Nephtheidae sp., Anthomastus sp., Duva florida)	17	9	3
Temperate	eastern North Pacific	Benthic	Abyssal	Cnidaria	Anthozoa	Bathyphellia australis	3.1	14	11.5
Temperate	Northeast Atlantic	Benthic	Bathyal	Cnidaria	Anthozoa	Cirrhipathes sp.	5.49568	21.7749	1.6903
Temperate	Northeast Atlantic	Benthic	Bathyal	Cnidaria	Anthozoa	Cirrhipathes sp.	3.54016	23.3128	0.403255
Temperate	Northeast Atlantic	Benthic	Bathyal	Cnidaria	Anthozoa	Cirrhipathes sp.	8.04319	24.2132	0.529536
Temperate	Northeast Atlantic	Benthic	Bathyal	Cnidaria	Anthozoa	Desmophyllum pertusum	1.95194	10.9275	5.92876
Temperate	Northeast Atlantic	Benthic	Bathyal	Cnidaria	Anthozoa	Desmophyllum pertusum	4.27218	0	0.985857
Temperate	Northeast Atlantic	Benthic	Bathyal	Cnidaria	Anthozoa	Desmophyllum pertusum	1.33443	10.8779	7.22801
Temperate	Northwest Atlantic	Benthic	Bathyal	Cnidaria	Anthozoa	Flabellum alabastrum	10	9	1
Temperate	Northwest Atlantic	Benthic	Bathyal	Cnidaria	Anthozoa	Funiculina sp.	3	26	4
Temperate	Northeast Atlantic	Benthic	Bathyal	Cnidaria	Anthozoa	gorgonian spp.	10.0199	5.81148	3.80455
Temperate	Northeast Atlantic	Benthic	Bathyal	Cnidaria	Anthozoa	gorgonian spp.	14.737	6.43821	3.4403
Temperate	Northeast Atlantic	Benthic	Bathyal	Cnidaria	Anthozoa	gorgonian spp.	12.1219	4.06897	2.5095
Temperate	Northeast Atlantic	Benthic	Bathyal	Cnidaria	Anthozoa	Leiopathes sp.	1.42165	13.4705	0.566661
Temperate	Northeast Atlantic	Benthic	Bathyal	Cnidaria	Anthozoa	Leiopathes sp.	2.8604	14.4201	0.869073
Temperate	Northeast Atlantic	Benthic	Bathyal	Cnidaria	Anthozoa	Leiopathes sp.	2.71063	15.0229	0.452551
Temperate	Northeast Atlantic	Benthic	Bathyal	Cnidaria	Anthozoa	Madrepora oculata	3.95314	11.4738	6.33593
Temperate	Northeast Atlantic	Benthic	Bathyal	Cnidaria	Anthozoa	Madrepora oculata	9.4892	0.196589	4.5171
Temperate	Northeast Atlantic	Benthic	Bathyal	Cnidaria	Anthozoa	Madrepora oculata	2.58872	14.0659	6.50426
Temperate	Northwest Atlantic	Benthic	Bathyal	Cnidaria	Anthozoa	Paragorgia arborea	8	13	2
Temperate	Northwest Atlantic	Benthic	Bathyal	Cnidaria	Anthozoa	Pennatula aculeata	13	11	2
Temperate	Northwest Atlantic	Benthic	Bathyal	Cnidaria	Anthozoa	Pennatula grandis	1	18	2
Temperate	Northwest Atlantic	Benthic	Bathyal	Cnidaria	Anthozoa	Stauropathes arctica	1	11	2
Temperate	Northwest Atlantic	Benthic	Bathyal	Cnidaria	Anthozoa	Umbellula sp.	0	17	1
Temperate	Northeast Atlantic	Benthic	Bathyal	Chordata	Ascidiacea	Salpidae sp.	0	0	0.0283865
Temperate	Northeast Atlantic	Benthic	Bathyal	Chordata	Ascidiacea	Salpidae sp.	0.0130233	0	0.0532925
Temperate	Northeast Atlantic	Benthic	Bathyal	Chordata	Ascidiacea	Salpidae sp.	0.0218694	0.087771	0.222885
Temperate	Northeast Atlantic	Benthic	Bathyal	Echinodermata	Asteroidea	Asteroidea spp.	0.146363	0.000770333	0.00773683
Temperate	Northeast Atlantic	Benthic	Bathyal	Echinodermata	Asteroidea	Asteroidea spp.	0.218664	0	0.0134786
Temperate	Northeast Atlantic	Benthic	Bathyal	Echinodermata	Asteroidea	Asteroidea spp.	0.159471	0	0.00631378
Temperate	Northeast Atlantic	Benthic	Bathyal	Echinodermata	Asteroidea	Bathybiaster vexillifer	24	19	2
Temperate	Northeast Atlantic	Benthic	Bathyal	Echinodermata	Asteroidea	Brisinga endecacnemos	12	23	5
Temperate	Northeast Atlantic	Benthic	Bathyal	Echinodermata	Asteroidea	Brisingella coronata	11	27	9
Temperate	Northeast Atlantic	Benthic	Bathyal	Echinodermata	Asteroidea	Dytaster grandis grandis	23	22	1
Temperate	Northeast Atlantic	Benthic	Bathyal	Echinodermata	Asteroidea	Freyella elegans	14	24	6
Temperate	Northwest Atlantic	Benthic	Bathyal	Echinodermata	Asteroidea	Freyella microspina	17	13	2
Temperate	Northeast Atlantic	Benthic	Bathyal	Echinodermata	Asteroidea	Hymenaster membranaceus elegans	20	22	1
Temperate	Northeast Atlantic	Benthic	Bathyal	Echinodermata	Asteroidea	Hyphalaster inermis	23	15	0
Temperate	Northwest Atlantic	Benthic	Bathyal	Echinodermata	Asteroidea	Leptychaster arcticus	8	25	1
Temperate	Northwest Atlantic	Benthic	Bathyal	Echinodermata	Asteroidea	Mediaster bairdi	27	6	1
Temperate	Northwest Atlantic	Benthic	Bathyal	Echinodermata	Asteroidea	Myxaster sol	29	12	0
Temperate	Northwest Atlantic	Benthic	Bathyal	Echinodermata	Asteroidea	Psilaster andromeda	27	18	2
Temperate	Northeast Atlantic	Benthic	Bathyal	Echinodermata	Asteroidea	Styracaster chuni	24	11	1
Temperate	Northwest Atlantic	Benthic	Bathyal	Echinodermata	Asteroidea	Zoroaster fulgens	5	17	3
Temperate	Northeast Atlantic	Benthic	Bathyal	Echinodermata	Asteroidea	Zoroaster longicauda	15	25	3
Temperate	Northeast Atlantic	Benthic	Bathyal	Mollusca	Bivalvia	Hiatella arctica	7.74503	0	15.2116
Temperate	Northeast Atlantic	Benthic	Bathyal	Mollusca	Bivalvia	Hiatella arctica	11.9586	17.6297	15.0042
Temperate	Northeast Atlantic	Benthic	Bathyal	Porifera	Demospongiae	Aphrocallistes sp.	0.0963353	0.106361	0.0569546
Temperate	Northeast Atlantic	Benthic	Bathyal	Porifera	Demospongiae	Aphrocallistes sp.	0.0228572	0.0336433	0.573519
Temperate	Northeast Atlantic	Benthic	Bathyal	Porifera	Demospongiae	Aphrocallistes sp.	0.0210378	0.0378103	0.369948
Temperate	Northwest Atlantic	Benthic	Bathyal	Porifera	Demospongiae	Cliona sp.	0	6	2
Temperate	Northwest Atlantic	Benthic	Bathyal	Porifera	Demospongiae	Craniella cranium	0	0	1
Temperate	Northwest Atlantic	Benthic	Bathyal	Porifera	Demospongiae	Geodia sp.	0	0	6
Temperate	Northwest Atlantic	Benthic	Bathyal	Porifera	Demospongiae	Hamacantha (Vomerula) carteri	0	12	0
Temperate	Northwest Atlantic	Benthic	Bathyal	Porifera	Demospongiae	Iophon piceum	0	8	19
Temperate	Northwest Atlantic	Benthic	Bathyal	Porifera	Demospongiae	Phakellia spp.	0	5	1
Temperate	Northwest Atlantic	Benthic	Bathyal	Porifera	Demospongiae	Polymastia spp.	3	7	10
Temperate	Northeast Atlantic	Benthic	Bathyal	Porifera	Demospongiae	Spongosorites sp.	0	0.00433028	0.12144
Temperate	Northeast Atlantic	Benthic	Bathyal	Porifera	Demospongiae	Spongosorites sp.	0	0	0.0103411
Temperate	Northeast Atlantic	Benthic	Bathyal	Porifera	Demospongiae	Spongosorites sp.	0	0	0.0134156
Temperate	Northwest Atlantic	Benthic	Bathyal	Porifera	Demospongiae	Tentorium semisuberites	5	12	5
Temperate	Northwest Atlantic	Benthic	Bathyal	Porifera	Demospongiae	Thenea muricata	0	6	7
Temperate	Northeast Atlantic	Benthic	Bathyal	Echinodermata	Echinoidea	Cidaris sp.	0.236909	0.00643119	0
Temperate	Northeast Atlantic	Benthic	Bathyal	Echinodermata	Echinoidea	Cidaris sp.	0.00160273	0.0124447	0
Temperate	Northeast Atlantic	Benthic	Bathyal	Echinodermata	Echinoidea	Cidaris sp.	0.261654	0.0477089	0.0149739
Temperate	Northeast Atlantic	Benthic	Bathyal	Echinodermata	Echinoidea	Echinus sp.	0.228029	0.0928892	0.042568
Temperate	Northwest Atlantic	Benthic	Bathyal	Echinodermata	Echinoidea	Phormosoma placenta	14	11	2
Temperate	Pacific Ocean	Benthic	Abyssal	Nematoda	Enoplea	Metaphanoderma sp.	9.2	5.8	1.1
Temperate	Sea of Okhotsk	Benthic	Bathyal	Nematoda	Enoplea	Metoncholaimus sp.	5.8	4	3.1
Temperate	Sea of Okhotsk	Benthic	Bathyal	Nematoda	Enoplea	Metoncholaimus spp.	13.1	6.2	3.1
Temperate	Pacific Ocean	Benthic	Abyssal	Nematoda	Enoplea	Oncholaimus sp.	4	9.2	8
Temperate	Pacific Ocean	Benthic	Bathyal	Nematoda	Enoplea	Oncholaimus sp.	6.1	11.7	10.5
Temperate	Pacific Ocean	Benthic	Bathyal	Nematoda	Enoplea	Synonchinae spp.	4.9	17.2	11.7
Temperate	Northwest Atlantic	Benthic	Bathyal	Mollusca	Gastropoda	Buccinum sp.	4	25	4
Temperate	Northwest Atlantic	Benthic	Bathyal	Mollusca	Gastropoda	Colus islandicus	13	14	3
Temperate	Northwest Atlantic	Benthic	Bathyal	Mollusca	Gastropoda	Neptunea despecta	13	0	2
Temperate	Northwest Atlantic	Benthic	Bathyal	Porifera	Hexactinellida	Euplectella spp.	1	10	8
Temperate	Northeast Atlantic	Benthic	Bathyal	Porifera	Hexactinellida	Hexactinellida sp.	0.0590353	0.0841274	0.0346802
Temperate	Northwest Atlantic	Benthic	Bathyal	Arthropoda	Hexanauplia	Arcoscalpellum michelottianum	1	15	15
Temperate	eastern North Pacific	Benthic	Abyssal	Echinodermata	Holothuroidea	Abyssocucumis abyssorum	6.8	13.5	5.4
Temperate	eastern North Pacific	Benthic	Abyssal	Echinodermata	Holothuroidea	Oneirophanta mutabilis	2.2	2.9	1.5
Temperate	eastern North Pacific	Benthic	Abyssal	Echinodermata	Holothuroidea	Peniagone vitrea	8.5	17.8	8.3
Temperate	eastern North Pacific	Benthic	Abyssal	Echinodermata	Holothuroidea	Protankyra brychia	12.1	16.6	7.2
Temperate	Northeast Atlantic	Benthic	Bathyal	Echinodermata	Holothuroidea	Psolus sp.	0.2353	0.135455	0.0574153
Temperate	Northeast Atlantic	Benthic	Abyssal	Echinodermata	Holoturoidea	Amperima rosea	12	27	12
Temperate	Northeast Atlantic	Benthic	Abyssal	Echinodermata	Holoturoidea	Amperima rosea	13	6	3
Temperate	Northeast Atlantic	Benthic	Abyssal	Echinodermata	Holoturoidea	Amperima rosea	14	23	9
Temperate	Northeast Atlantic	Benthic	Bathyal	Echinodermata	Holoturoidea	Bathyplotes natans	14	22	15
Temperate	Northeast Atlantic	Benthic	Bathyal	Echinodermata	Holoturoidea	Bathyplotes natans	4	0	4
Temperate	Northeast Atlantic	Benthic	Bathyal	Echinodermata	Holoturoidea	Bathyplotes natans	19	21	11
Temperate	Northeast Atlantic	Benthic	Bathyal	Echinodermata	Holoturoidea	Benthogone rosea	32	18	5
Temperate	Northeast Atlantic	Benthic	Bathyal	Echinodermata	Holoturoidea	Benthogone rosea	16	9	3
Temperate	Northeast Atlantic	Benthic	Abyssal	Echinodermata	Holoturoidea	Deima validum	30	27	4
Temperate	Northeast Atlantic	Benthic	Abyssal	Echinodermata	Holoturoidea	Deima validum	26	23	5
Temperate	Northeast Atlantic	Benthic	Abyssal	Echinodermata	Holoturoidea	Deima validum	20	23	5
Temperate	Northeast Atlantic	Benthic	Bathyal	Echinodermata	Holoturoidea	Laetmogone violacea	22	2	1
Temperate	Northeast Atlantic	Benthic	Bathyal	Echinodermata	Holoturoidea	Laetmogone violacea	22	12	6
Temperate	Northeast Atlantic	Benthic	Bathyal-Abyssal	Echinodermata	Holoturoidea	Oneirophanta mutabilis	15	13	4
Temperate	Northeast Atlantic	Benthic	Bathyal-Abyssal	Echinodermata	Holoturoidea	Oneirophanta mutabilis	10	12	8
Temperate	Northeast Atlantic	Benthic	Abyssal	Echinodermata	Holoturoidea	Paroriza pallens	29	10	3
Temperate	Northeast Atlantic	Benthic	Bathyal	Echinodermata	Holoturoidea	Paroriza pallens	31	8	1
Temperate	Northeast Atlantic	Benthic	Abyssal	Echinodermata	Holoturoidea	Paroriza prouhoi	22	32	6
Temperate	Northeast Atlantic	Benthic	Abyssal	Echinodermata	Holoturoidea	Paroriza prouhoi	26	17	4
Temperate	Northeast Atlantic	Benthic	Abyssal	Echinodermata	Holoturoidea	Psychropotes longicauda	39	20	6
Temperate	Northeast Atlantic	Benthic	Abyssal	Echinodermata	Holoturoidea	Psychropotes longicauda	15	16	7
Temperate	Northeast Atlantic	Benthic	Bathyal	Cnidaria	Hydrozoa	Hydrozoa spp.	6.23786	5.11185	7.2888
Temperate	Northeast Atlantic	Benthic	Bathyal	Cnidaria	Hydrozoa	Hydrozoa spp.	2.45721	3.16906	3.54031
Temperate	Northeast Atlantic	Benthic	Bathyal	Cnidaria	Hydrozoa	Hydrozoa spp.	1.41535	1.91274	1.40525
Temperate	eastern North Pacific	Benthic	Abyssal	Arthropoda	Malacostraca	Caridean shrimp	1.4	7.2	3.3
Temperate	eastern North Pacific	Benthic	Abyssal	Arthropoda	Malacostraca	Lysianassid amphipod sp 1	1.9	6.3	7.9
Temperate	eastern North Pacific	Benthic	Abyssal	Arthropoda	Malacostraca	Lysianassid amphipod sp 2	0.9	2.7	3.7
Temperate	Northeast Atlantic	Benthic	Bathyal	Arthropoda	Malacostraca	Munida sp.	13.4578	0	16.1579
Temperate	Northeast Atlantic	Benthic	Bathyal	Arthropoda	Malacostraca	Munida sp.	14.8755	0	16.7493
Temperate	Northeast Atlantic	Benthic	Bathyal	Arthropoda	Malacostraca	Munida sp.	13.9814	0	15.1023
Temperate	Northeast Atlantic	Benthic	Bathyal	Arthropoda	Malacostraca	Munida sp.	0.109711	0	0.116975
Temperate	Northeast Atlantic	Benthic	Bathyal	Arthropoda	Malacostraca	Munida sp.	0.15321	0	0.14938
Temperate	Northeast Atlantic	Benthic	Bathyal	Arthropoda	Malacostraca	Munida sp.	0.0424546	0	0.173084
Temperate	eastern North Pacific	Benthic	Abyssal	Arthropoda	Malacostraca	Munidopsis sp.	4.1	19.6	12.1
Temperate	Northwest Atlantic	Benthic	Bathyal	Arthropoda	Malacostraca	Stereomastis sculpta	8	11	15
Temperate	Northeast Atlantic	Benthic	Bathyal	Arthropoda	Maxillopoda	Cirripedia spp.	0.92479	0	11.795
Temperate	Northeast Atlantic	Benthic	Bathyal	Arthropoda	Maxillopoda	Cirripedia spp.	0.427514	0	9.13793
Temperate	Northeast Atlantic	Benthic	Bathyal	Arthropoda	Maxillopoda	Cirripedia spp.	0.474139	13.9228	9.68275
Temperate	Northwest Atlantic	Benthic	Bathyal	Echinodermata	Ophiuroidea	Gorgonocephalus sp.	1	19	2
Temperate	eastern North Pacific	Benthic	Abyssal	Echinodermata	Ophiuroidea	Ophiacantha sp.	2.8	9.4	1
Temperate	eastern North Pacific	Benthic	Abyssal	Echinodermata	Ophiuroidea	Ophiura bathybia	2.7	11.3	2.1
Temperate	Northeast Atlantic	Benthic	Bathyal	Echinodermata	Ophiuroidea	Ophiuroidea spp.	0.0166134	0.119375	0.0330413
Temperate	Northeast Atlantic	Benthic	Bathyal	Echinodermata	Ophiuroidea	Ophiuroidea spp.	0.0390285	0.137161	0.0280109
Temperate	Northeast Atlantic	Benthic	Bathyal	Echinodermata	Ophiuroidea	Ophiuroidea spp.	0.175631	0	0.0178413
Temperate	Northeast Atlantic	Benthic	Bathyal	Echinodermata	Ophiuroidea	Ophiuroidea spp.	0.157151	0.0728708	0.0148694
Temperate	Northeast Atlantic	Benthic	Bathyal	Echinodermata	Ophiuroidea	Ophiuroidea spp.	0.148051	0.0840164	0.0148761
Temperate	Northeast Atlantic	Benthic	Bathyal	Annelida	Polychaeta	Eunice norvegica	0.0373272	0.161942	0.0729263
Temperate	Northeast Atlantic	Benthic	Bathyal	Annelida	Polychaeta	Eunice norvegica	0.047518	0.187694	0.0643308
Temperate	Northeast Atlantic	Benthic	Bathyal	Annelida	Polychaeta	Hesionidae sp.	0.00450477	0	0.158505
Temperate	Northeast Atlantic	Benthic	Bathyal	Annelida	Polychaeta	Hesionidae sp.	0.00629483	0.119818	0.14076
Temperate	Northeast Atlantic	Benthic	Bathyal	Annelida	Polychaeta	Hesionidae sp.	0.0109862	0.0797161	0.226862
Temperate	eastern North Pacific	Benthic	Abyssal	Annelida	Polychaeta	Laetmonice sp.	0.2	8.8	4.2
Temperate	Northwest Atlantic	Benthic	Bathyal	Annelida	Polychaeta	Nereididae sp.	1	11	13
Temperate	eastern North Pacific	Benthic	Abyssal	Annelida	Polychaeta	Paradiopatra sp.	1	12.3	3.6
Temperate	Northwest Atlantic	Benthic	Bathyal	Annelida	Polychaeta	Polychaeta sp 1	1	13	11
Temperate	Northwest Atlantic	Benthic	Bathyal	Annelida	Polychaeta	Polychaeta sp 2	1	8	11
Temperate	Northwest Atlantic	Benthic	Bathyal	Annelida	Polychaeta	Polychaeta sp 3	1	10	6
Temperate	Northwest Atlantic	Benthic	Bathyal	Annelida	Polychaeta	Polynoidae sp 1	3	14	12
Temperate	Northwest Atlantic	Benthic	Bathyal	Annelida	Polychaeta	Polynoidae sp 2	1	18	14
Temperate	eastern North Pacific	Benthic	Abyssal	Annelida	Polychaeta	Travisia sp.	2.5	2.2	0.2
Temperate	Northwest Atlantic	Benthic	Bathyal	Sipuncula	Sipunculidea	Sipunculidea sp 1	11	11	2
Temperate	Northwest Atlantic	Benthic	Bathyal	Sipuncula	Sipunculidea	Sipunculidea sp 2	4	2	0
Temperate	Northeast Atlantic	Demersal	Bathyal-Abyssal	Chordata	Actinopterygii	Antimora rostrata	3.5	7.3	42
Temperate	Northeast Atlantic	Demersal	Bathyal	Chordata	Actinopterygii	Cataetyx alleni	0.0264563	0.0607926	0.274055
Temperate	Northeast Atlantic	Demersal	Bathyal	Chordata	Actinopterygii	Cataetyx alleni	0.0347462	0.0534848	0.374068
Temperate	Northeast Atlantic	Demersal	Bathyal	Chordata	Actinopterygii	Coelorinchus abditilux	0.0665447	0.0849316	0.428839
Temperate	eastern North Pacific	Demersal	Abyssal	Chordata	Actinopterygii	Coryphaenoides armatus	4.6	9.4	34.8
Temperate	Northeast Atlantic	Demersal	Bathyal-Abyssal	Chordata	Actinopterygii	Coryphaenoides armatus	3.7	7.1	43
Temperate	Northeast Atlantic	Demersal	Bathyal-Abyssal	Chordata	Actinopterygii	Coryphaenoides guentheri	5.3	8.6	37.4
Temperate	Northeast Atlantic	Pelagic	Bathy-Abyssopelagic	Chordata	Actinopterygii	Coryphaenoides rupestris	3.5	7	38.3
Temperate	Eastern Pacific	Demersal	Bathyal	Chordata	Actinopterygii	Coryphaenoides sp.	5	3	19
Temperate	eastern North Pacific	Demersal	Abyssal	Chordata	Actinopterygii	Coryphaenoides yaquinae	3.7	7.1	34.6
Temperate	Northeast Atlantic	Demersal	Bathyal	Chordata	Actinopterygii	Epigonus telescopus	0.00822067	0.232249	0.0859431
Temperate	Eastern Pacific	Demersal	Bathyal	Chordata	Actinopterygii	Eptatretus sp.	0	0.4	0.9
Temperate	Northeast Atlantic	Demersal	Bathyal	Chordata	Actinopterygii	Gaidropsarus vulgaris	0.0384417	0.0588473	0.315285
Temperate	Northeast Atlantic	Demersal	Bathyal	Chordata	Actinopterygii	Gaidropsarus vulgaris	0.0385123	0.0666509	0.274411
Temperate	Northeast Atlantic	Demersal	Bathyal	Chordata	Actinopterygii	Gaidropsarus vulgaris	0.0387031	0.0679316	0.361413
Temperate	Northeast Atlantic	Demersal	Bathyal	Chordata	Actinopterygii	Guttigadus latifrons	0.0267898	0.0882551	0.288102
Temperate	Northeast Atlantic	Demersal	Bathyal	Chordata	Actinopterygii	Guttigadus latifrons	0.0238867	0.060773	0.329503
Temperate	Northeast Atlantic	Demersal	Bathyal	Chordata	Actinopterygii	Lepidion eques	0.0161432	0	0.277286
Temperate	Northeast Atlantic	Demersal	Bathyal	Chordata	Actinopterygii	Lepidion eques	0.0271061	0.0391447	0.334878
Temperate	Northeast Atlantic	Demersal	Bathyal	Chordata	Actinopterygii	Lepidion eques	0.0288017	0.0469416	0.287336
Temperate	Northeast Atlantic	Demersal	Bathyal	Chordata	Actinopterygii	Lepidion eques	0.0492523	0.0714158	0.278688
Temperate	Northeast Atlantic	Demersal	Bathyal-Abyssal	Chordata	Actinopterygii	Lepidion eques	3.2	8	37.1
Temperate	Northeast Atlantic	Demersal	Bathyal	Chordata	Actinopterygii	Macrourus berglax	5.73	16.77	29.55
Temperate	Northeast Atlantic	Demersal	Bathyal	Chordata	Actinopterygii	Neocyttus helgae	0.0180724	0.0717084	0.105831
Temperate	Northeast Atlantic	Demersal	Bathyal	Mollusca	Cephalopoda	Bathypolypus bairdii	8.63232	15.8611	34.0937
Temperate	Northeast Atlantic	Demersal	Bathyal	Mollusca	Cephalopoda	Bathypolypus bairdii	7.15738	23.3807	27.1863
Temperate	Northeast Atlantic	Demersal	Bathyal	Chordata	Elasmobranchii	Centrophorus squamosus	6.24	2.51	39.67
Temperate	Northeast Atlantic	Demersal	Bathyal	Chordata	Elasmobranchii	Centroscyllium fabricii	6.97	4.73	38.67
Temperate	Northeast Atlantic	Demersal	Bathyal	Chordata	Elasmobranchii	Centroscymnus coelolepis	5.88	3	33.15
Temperate	Northeast Atlantic	Demersal	Bathyal	Arthropoda	Malacostraca	Amphipoda sp.	1.2581	6.61204	9.5528
Temperate	Northeast Atlantic	Demersal	Bathyal	Arthropoda	Malacostraca	Bathynectes sp.	6.96433	27.3583	15.419
Temperate	Northeast Atlantic	Demersal	Bathyal	Arthropoda	Malacostraca	Bathynectes sp.	7.12765	0	14.9823
Temperate	Northeast Atlantic	Demersal	Bathyal	Arthropoda	Malacostraca	Bathynectes sp.	3.28894	17.8307	17.2365
Temperate	Northeast Atlantic	Demersal	Bathyal	Arthropoda	Malacostraca	Caridea spp.	2.65691	14.789	14.643
Temperate	Eastern Pacific	Pelagic	Mesopelagic	Chordata	Actinopterygii	Argyropelecus sp.	2.6	3.8	13.5
Temperate	Eastern Pacific	Pelagic	Bathypelagic	Chordata	Actinopterygii	Avocettina sp.	0	4.6	13.4
Temperate	Eastern Pacific	Pelagic	Bathypelagic	Chordata	Actinopterygii	Bajacalifornia sp.	2.5	3.6	15
Temperate	Eastern Pacific	Pelagic	Mesopelagic	Chordata	Actinopterygii	Leuroglossus sp.	0	2.8	6.4
Temperate	Northeast Atlantic	Pelagic	Meso-Bathypelagic	Chordata	Actinopterygii	Mora moro	6	14.73	37.15
Temperate	Eastern Pacific	Pelagic	Mesopelagic	Chordata	Actinopterygii	Myctophum sp.	0.7	4.1	12.5
Temperate	Eastern Pacific	Pelagic	Bathypelagic	Chordata	Actinopterygii	Scopelengys sp.	1.8	2.8	12.8
Temperate	Eastern Pacific	Pelagic	Bathypelagic	Chordata	Actinopterygii	Serrivomer sp.	3.8	3.2	8.7
Temperate	Eastern Pacific	Pelagic	Bathypelagic	Chordata	Actinopterygii	Triphotorus sp.	0	3.6	6
Temperate	Eastern Pacific	Pelagic	Mesopelagic	Chordata	Actinopterygii	Vinciguerria sp.	1.3	7	26.5
Temperate	eastern North Pacific	Pelagic	Abyssopelagic	Mollusca	Cephalopoda	Dosidicus gigas	0.9	12.7	34.8
Temperate	Eastern Pacific	Pelagic	Bathypelagic	Arthropoda	Malacostraca	Acantephyra sp.	0.6	1.9	6.3
Temperate	Eastern Pacific	Pelagic	Bathypelagic	Arthropoda	Malacostraca	Acantephyra sp.	1.1	0.7	4.4
Temperate	Northwest Atlantic	Pelagic	Meso-bathypelagic	Arthropoda	Malacostraca	Acanthephyra pelagica	0	8	7
Temperate	Eastern Pacific	Pelagic	Bathypelagic	Arthropoda	Malacostraca	Gnatophausia sp.	4.8	5.9	6.3
Temperate	Northwest Atlantic	Pelagic	Meso-bathypelagic	Arthropoda	Malacostraca	Notostomus robustus	1	24	14
Temperate	Northwest Atlantic	Pelagic	Meso-bathypelagic	Arthropoda	Malacostraca	Pandalus borealis	1	20	17
Temperate	Eastern Pacific	Pelagic	Bathypelagic	Arthropoda	Malacostraca	Pasiphaea sp.	0	6.8	8.5
Temperate	Northwest Atlantic	Pelagic	Meso-bathypelagic	Arthropoda	Malacostraca	Pasiphaea tarda	1	16	19
Temperate	Northwest Atlantic	Pelagic	Meso-bathypelagic	Arthropoda	Malacostraca	Sabinea hystrix	2	17	16
Tropical	Arabian Sea	Benthic	Bathyal	Cnidaria	Anthozoa	Actinoscyphia sp.	13	15	14
Tropical	Arabian Sea	Benthic	Bathyal	Cnidaria	Anthozoa	Actinoscyphia sp.	0	6	2
Tropical	Arabian Sea	Benthic	Bathyal	Cnidaria	Anthozoa	Echinoptilum sp.	21	9	4
Tropical	Arabian Sea	Benthic	Bathyal	Echinodermata	Asteroidea	Astropecten sp.	17	4	1
Tropical	Arabian Sea	Benthic	Bathyal	Arthropoda	Malacostraca	Pontocaris sp./Solenocera sp.	4	2	17
Tropical	Arabian Sea	Benthic	Bathyal	Arthropoda	Malacostraca	Solenocera sp.	12	15	29
Tropical	Arabian Sea	Benthic	Bathyal	Annelida	Polychaeta	Hyalinoecia sp.	1	7	1
